# Supplementary material
Source: publisher figshare collection journal article supplement (https://acs.figshare.com/ndownloader/files/10246515)

# Supporting Information

## **Irradiation-Induced Palladium-Catalyzed Decarboxylative Heck Reaction of Aliphatic N-(Acyloxy)phthalimides at Room Temperature**

Guang-Zu Wang,<sup>†</sup> Rui Shang,<sup>\*,†,‡</sup> and Yao Fu<sup>\*,†</sup>

*<sup>†</sup>Hefei National Laboratory for Physical Sciences at the Microscale, CAS Key Laboratory of Urban Pollutant Conversion, Anhui Province Key Laboratory of Biomass Clean Energy, iChEM, Department of Chemistry, University of Science and Technology of China, Hefei 230026, China.*

*<sup>‡</sup>Department of Chemistry, School of Science, The University of Tokyo, 7-3-1 Hongo, Bunkyo-ku, Tokyo 113-0033, Japan*

[rui@chem.s.u-tokyo.ac.jp](mailto:rui@chem.s.u-tokyo.ac.jp); [fuyao@ustc.edu.cn](mailto:fuyao@ustc.edu.cn)

## **Table of Contents**

|                                                       |                |
|-------------------------------------------------------|----------------|
| <b>1. General Information</b>                         | <b>S3</b>      |
| <b>2. Preparation of Substrates</b>                   | <b>S4-S7</b>   |
| <b>3. Investigation of the Key Reaction Parameter</b> | <b>S7-S11</b>  |
| <b>4. Experimental Procedures and Spectral Data</b>   | <b>S12-S25</b> |
| <b>5. Intermolecular Kinetic Isotope Experiment</b>   | <b>S26-S27</b> |
| <b>6. UV-Vis. Experiment</b>                          | <b>S28</b>     |
| <b>7. NMR Spectra</b>                                 | <b>S29-S70</b> |

## 1. General Information

All reactions were carried out in oven-dried Schlenk tubes under argon atmosphere (purity $\geq$ 99.99%) unless otherwise mentioned. Commercial reagents were purchased from Adamas, TCI and Aldrich. Organic solutions were concentrated under reduced pressure on Buchi rotary evaporator. Flash column chromatographic purification of products was accomplished using forced-flow chromatography on Silica Gel (200-300 mesh).

$^1\text{H}$ -NMR,  $^{19}\text{F}$ -NMR and  $^{13}\text{C}$ -NMR spectra were recorded on a Bruker Avance 400 spectrometer at ambient temperature. Data for  $^1\text{H}$ -NMR are reported as follows: chemical shift (ppm, scale), multiplicity (s = singlet, d = doublet, t = triplet, q = quartet, m = multiplet and/or multiplet resonances, br = broad), coupling constant (Hz), and integration. Data for  $^{13}\text{C}$ -NMR are reported in terms of chemical shift (ppm, scale), multiplicity, and coupling constant (Hz). HRMS analysis was performed on Finnigan LCQ advantage Max Series MS System. ESI-mass data were acquired using a Thermo LTQ Orbitrap XL Instrument equipped with an ESI source and controlled by Xcalibur software. UV-Vis spectrum was measured by UV-3600.

## 2. Preparation of Substrates

### 2.1 Preparation of redox active esters

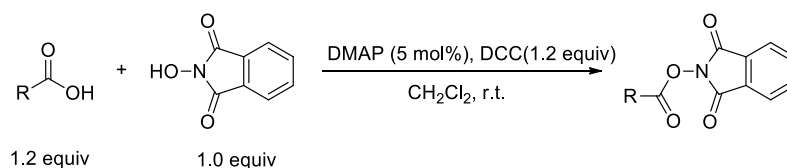

The corresponding alkyl carboxylic acids or N-protected amino acids (12 mmol, 1.2 equiv), N-hydroxyphthalimide (1.63 g, 10 mmol, 1.0 equiv), and 4-dimethylaminopyridine (61mg, 0.5 mmol, 5 mol%) were mixed in a flask with a magnetic stirring bar, 30 mL  $\text{CH}_2\text{Cl}_2$  was added. Then a solution of N,N'-dicyclohexylcarbodiimide (2.06 g, 12 mmol, 1.2 equiv) in  $\text{CH}_2\text{Cl}_2$  (10 mL) was added slowly at room temperature. The reaction mixture was maintained at room temperature with stirring for 0.5 - 3h. When the N-hydroxyphthalimide was

completely converted, the white precipitate was filtered off and the solution was concentrated on a rotary evaporator. The residue was purified by flash column chromatography to give corresponding redox active esters.

## 2.2 Preparation of vinyl arenes and vinyl heteroarenes

### General Procedure for preparation of vinyl arenes and vinyl heteroarenes:

Ph<sub>3</sub>PMeBr (4.29 g, 12.0 mmol) was added to an oven-dried transparent Schlenk tube (100 mL) equipped with a stirring bar. The tube was evacuated and filled with argon (three times). Anhydrous tetrahydrofuran (THF) (40.0 mL) was added to the tube under argon, and then n-BuLi (2.5 M, 4.8 mL, 12.0 mmol) was added dropwise to the solution at 0 °C. The mixture was stirred at 0 °C for 15 min, then a THF solution of aldehyde (10 mmol) was added at 0 °C. The reaction mixture was stirred at r.t. for 48 h. The resulting solution was quenched with aqueous solution of NH<sub>4</sub>Cl and the mixture was extracted with ethyl acetate (3 x 40 mL). The combined organic phases were dried over MgSO<sub>4</sub>, concentrated under vacuo. The residue was purified by column chromatography on silica gel.

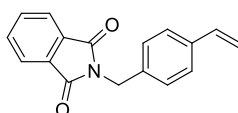

**2-(4-vinylbenzyl)isoindoline-1,3-dione (S-1):** 1-(chloromethyl)-4-vinylbenzene (10 mmol) was added to a solution of phthalimide (10 mmol) and K<sub>2</sub>CO<sub>3</sub> (1.2 equiv) in DMF (0.2 M) at room temperature and then stirred overnight. Next, the reaction mixture was diluted with Et<sub>2</sub>O, washed with water, saturated NaHCO<sub>3</sub>, and brine, dried over Na<sub>2</sub>SO<sub>4</sub>, and concentrated on a rotary evaporator. The residue was purified by flash column chromatography on silica gel (petroleum ether: ethyl acetate = 20 : 1). White solid. (2.31g, 88% )

<sup>1</sup>H NMR (400 MHz, CDCl<sub>3</sub>) δ 7.84 (d, *J* = 4.0 Hz, 2H), 7.71 (d, *J* = 4.0 Hz, 2H), 7.37 (dd, *J* = 18.3, 8.0 Hz, 4H), 6.67 (dd, *J* = 17.6, 10.8 Hz, 1H), 5.71 (d, *J* = 17.5 Hz, 1H), 5.22 (d, *J* = 11.1 Hz, 1H), 4.83 (s, 2H).

$^{13}\text{C}$  NMR (101 MHz,  $\text{CDCl}_3$ )  $\delta$  168.0, 137.2, 136.3, 135.8, 134.0, 132.1, 128.9, 126.5, 123.4, 114.2, 41.3.

HRMS (ESI) Calcd for  $\text{C}_{17}\text{H}_{14}\text{NO}_2^+$   $[\text{M}+\text{H}]^+$ : 264.1019, found: 264.1011.

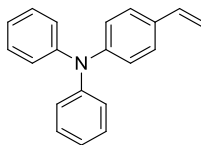

**N,N-diphenyl-4-vinylaniline (S-2):** The styrene was prepared according to General Procedure from the corresponding aldehyde, *4-(diphenylamino)benzaldehyde*. The product was purified by flash column chromatography on silica gel (petroleum ether). White solid. (2.47g, 91%)

$^1\text{H}$  NMR (400 MHz,  $\text{CDCl}_3$ )  $\delta$  7.29 – 7.26 (m, 6H), 7.15 – 6.97 (m, 8H), 6.66 (dd,  $J$  = 17.6, 11.0 Hz, 1H), 5.64 (d,  $J$  = 17.6 Hz, 1H), 5.15 (d,  $J$  = 10.9 Hz, 1H).

$^{13}\text{C}$  NMR (101 MHz,  $\text{CDCl}_3$ )  $\delta$  147.6, 147.5, 136.2, 131.9, 129.3, 127.1, 124.4, 123.6, 122.9, 112.2.

HRMS (ESI) Calcd for  $\text{C}_{20}\text{H}_{18}\text{N}^+$   $[\text{M}+\text{H}]^+$ : 272.1434, found: 272.1424.

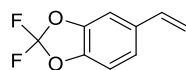

**2,2-difluoro-5-vinylbenzo[d][1,3]dioxole (S-3):** The styrene was prepared according to General Procedure from the corresponding aldehyde, *2,2-difluorobenzo[d][1,3]dioxole-5-carbaldehyde*. The product was purified by flash column chromatography on silica gel (petroleum ether). White solid. (85%, 1.58g)

$^1\text{H}$  NMR (400 MHz,  $\text{CDCl}_3$ )  $\delta$  7.04 (s, 1H), 6.96 (d,  $J$  = 8.3 Hz, 1H), 6.88 (d,  $J$  = 8.3 Hz, 1H), 6.55 (dd,  $J$  = 17.5, 10.9 Hz, 1H), 5.55 (d,  $J$  = 17.5 Hz, 1H), 5.15 (d,  $J$  = 10.9 Hz, 1H).

$^{13}\text{C}$  NMR (101 MHz,  $\text{CDCl}_3$ )  $\delta$  144.2, 143.3, 135.6, 134.2, 129.74 (t,  $J$  = 254.6 Hz), 122.4, 114.2, 109.3, 106.5.

HRMS (EI) Calcd for  $\text{C}_9\text{H}_6\text{F}_2\text{O}_2^+$   $[\text{M}]^+$ : 184.0336, found: 184.0332.

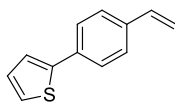

**2-(4-vinylphenyl)thiophene (S-4):** The styrene was prepared according to General Procedure from the corresponding aldehyde, *4-(thiophen-2-yl)benzaldehyde*. The product was purified by flash column chromatography on silica gel (petroleum ether). White solid. (81%, 1.51 g)

$^1\text{H}$  NMR (400 MHz,  $\text{CDCl}_3$ )  $\delta$  7.58 (d,  $J = 7.8$  Hz, 2H), 7.42 (d,  $J = 6.9$  Hz, 2H), 7.34 – 7.25 (m, 2H), 7.08 (s, 1H), 6.72 (dd,  $J = 19.3, 10.8$  Hz, 1H), 5.77 (d,  $J = 15.6$  Hz, 1H), 5.26 (d,  $J = 10.8$  Hz, 1H).

$^{13}\text{C}$  NMR (101 MHz,  $\text{CDCl}_3$ )  $\delta$  144.1, 136.7, 136.3, 133.8, 128.1, 126.7, 126.0, 124.8, 123.0, 113.9.

HRMS (EI) Calcd for  $\text{C}_{12}\text{H}_{10}\text{S}^+ [\text{M}]^+$ : 186.0503, found: 186.0506.

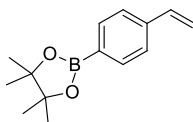

**4,4,5,5-tetramethyl-2-(4-vinylphenyl)-1,3,2-dioxaborolane (S-5):**

(4-vinylphenyl)boronic acid (20 mmol) was added to a solution of 2,3-dimethylbutane-2,3-diol (20 mmol) in  $\text{Et}_2\text{O}$  (0.2 M) with anhydrous  $\text{MgSO}_4$  (20 mmol) at room temperature and then stirred overnight. Next, the reaction mixture was filtered, concentrated on a rotary evaporator. The residue was purified by flash column chromatography on silica gel (petroleum ether: ethyl acetate = 20 : 1). White solid. (Ref: *Macromolecules*, **2005**, 38, 8987). (4.37 g, 95%)

$^1\text{H}$  NMR (400 MHz,  $\text{CDCl}_3$ )  $\delta$  7.91 – 7.72 (m, 2H), 7.41 (t,  $J = 6.8$  Hz, 2H), 6.82 – 6.65 (m, 1H), 5.81 (dd,  $J = 17.6, 4.9$  Hz, 1H), 5.28 (dd,  $J = 10.8, 4.1$  Hz, 1H), 1.34 (s, 12H).

$^{13}\text{C}$  NMR (101 MHz,  $\text{CDCl}_3$ )  $\delta$  140.2, 136.9, 135.0, 125.5, 114.9, 83.7, 24.9. The carbon directly attached to the boron atom was not detected due to quadrupolar broadening.

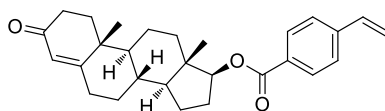

**(8R,9S,10R,13S,14S,17S)-10,13-dimethyl-3-oxo-2,3,6,7,8,9,10,11,12,13,14,15,16,17-tetradecahydro-1H-cyclopenta[a]phenanthren-17-yl (S-6):** 4-vinylbenzoic acid (20 mmol), was added to a solution of Testosterone (8R,9S,10R,13S,14S,17S)-17-hydroxy-10,13-dimethyl-6,7,8,9,10,11,12,13,14,15,16,17-dodecahydro-1H-cyclopenta[a]phenanthren-3(2H)-one (20 mmol), DMAP (20 mmol), DCC (20 mmol), in CH<sub>2</sub>Cl<sub>2</sub> (0.2 M) at room temperature and then stirred overnight. Next, the reaction mixture was filtered, concentrated on a rotary evaporator. The residue was purified by flash column chromatography on silica gel (petroleum ether: ethyl acetate = 20 : 1). White solid. (42%, 1.75g)

<sup>1</sup>H NMR (400 MHz, CDCl<sub>3</sub>) δ 7.98 (d, *J* = 8.0 Hz, 2H), 7.45 (d, *J* = 8.1 Hz, 2H), 6.74 (dd, *J* = 17.6, 10.9 Hz, 1H), 5.85 (d, *J* = 17.6 Hz, 1H), 5.73 (s, 1H), 5.37 (d, *J* = 10.9 Hz, 1H), 4.83 (t, *J* = 8.3 Hz, 1H), 2.47 – 2.22 (m, 5H), 2.01 (d, *J* = 12.7 Hz, 1H), 1.86 (d, *J* = 12.7 Hz, 2H), 1.72 – 1.56 (m, 5H), 1.49 – 1.35 (m, 2H), 1.29 – 0.99 (m, 7H), 0.97 (s, 3H).

<sup>13</sup>C NMR (101 MHz, CDCl<sub>3</sub>) δ 199.4, 170.9, 166.1, 141.7, 135.9, 129.7, 129.6, 126.0, 123.9, 116.4, 82.8, 53.6, 50.2, 42.8, 38.5, 36.6, 35.6, 35.3, 33.8, 32.7, 31.4, 27.6, 23.5, 20.5, 17.3, 12.2.

HRMS (ESI) Calcd for C<sub>28</sub>H<sub>35</sub>O<sub>3</sub><sup>+</sup> [M+H]<sup>+</sup>: 419.2581, found: 419.2566.

### 3. Investigation of the Key Reaction Parameter

#### 3.1 Screening of palladium salts <sup>a</sup>

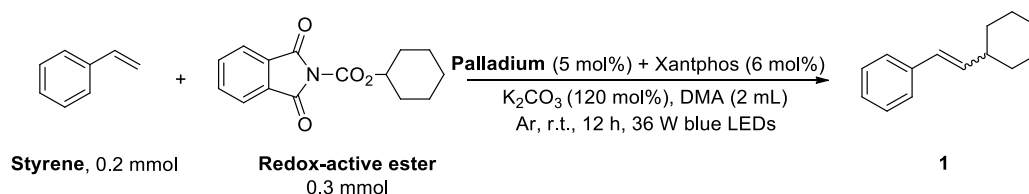

| entry | Pd.                                | yield <sup>b</sup> | <i>E/Z</i> <sup>b</sup> |
|-------|------------------------------------|--------------------|-------------------------|
| 1     | Pd <sub>2</sub> (dba) <sub>3</sub> | N.R                | /                       |
| 2     | Pd(PPh <sub>3</sub> ) <sub>4</sub> | 45%                | 98:2                    |
| 3     | PdCl <sub>2</sub>                  | N.R                | /                       |
| 4     | Pd(OAc) <sub>2</sub>               | Trace              | /                       |

|          |                                                      |            |             |
|----------|------------------------------------------------------|------------|-------------|
| <b>5</b> | <b>Pd(PPh<sub>3</sub>)<sub>2</sub>Cl<sub>2</sub></b> | <b>69%</b> | <b>99:1</b> |
| 6        | Pd(PhCN) <sub>2</sub> Cl <sub>2</sub>                | N.R        | /           |

<sup>a</sup>Reaction condition: styrene (0.2 mmol), redox-active ester (0.3 mmol), **palladium salt** (5 mol%), Xantphos (6 mol%), K<sub>2</sub>CO<sub>3</sub> (120 mol%) in DMA (2 mL), irradiation by 36W blue LEDs at room temperature for 12 h under argon atmosphere. <sup>b</sup>GC yield using biphenyl as an internal standard.

### 3.2 Screening of solvents <sup>a</sup>

| 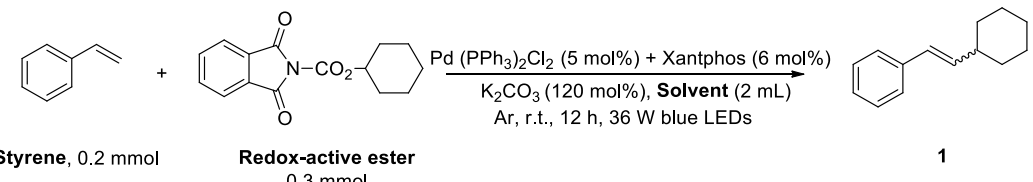 |                                       |                    |                  |
|------------------------------------------------------------------------------------|---------------------------------------|--------------------|------------------|
| <b>Styrene</b> , 0.2 mmol                                                          | <b>Redox-active ester</b><br>0.3 mmol |                    | <b>1</b>         |
| entry                                                                              | Solvent                               | yield <sup>b</sup> | E/Z <sup>b</sup> |
| 1                                                                                  | Toluene                               | Trace              | /                |
| 2                                                                                  | DCE                                   | N.R                | /                |
| 3                                                                                  | CH <sub>3</sub> CN                    | Trace              | /                |
| <b>4</b>                                                                           | <b>DMA</b>                            | <b>71%</b>         | <b>99:1</b>      |
| 5                                                                                  | DMF                                   | 55%                | 98:2             |
| 6                                                                                  | THF                                   | 16%                | /                |
| 7                                                                                  | Dioxane                               | Trace              | /                |

<sup>a</sup>Reaction condition: styrene (0.2 mmol), redox-active ester (0.3 mmol), Pd(PPh<sub>3</sub>)<sub>2</sub>Cl<sub>2</sub> (5 mol%), Xantphos (6 mol%), K<sub>2</sub>CO<sub>3</sub> (120 mol%) in **solvent** (2 mL), irradiation by 36W blue LEDs at room temperature for 12 h under argon atmosphere. <sup>b</sup>GC yield using biphenyl as an internal standard.

### 3.3 Screening of bases <sup>a</sup>

| 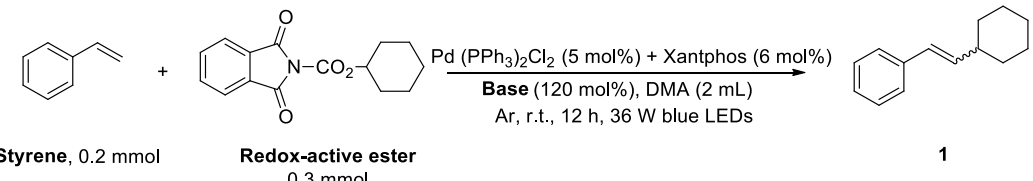 |                                       |                    |                  |
|--------------------------------------------------------------------------------------|---------------------------------------|--------------------|------------------|
| <b>Styrene</b> , 0.2 mmol                                                            | <b>Redox-active ester</b><br>0.3 mmol |                    | <b>1</b>         |
| entry                                                                                | Base                                  | yield <sup>b</sup> | E/Z <sup>b</sup> |
| 1                                                                                    | KOAc                                  | 30%                | /                |
| 2                                                                                    | Na <sub>2</sub> CO <sub>3</sub>       | 48%                | /                |
| <b>3</b>                                                                             | <b>K<sub>2</sub>CO<sub>3</sub></b>    | <b>70%</b>         | <b>99:1</b>      |
| 4                                                                                    | Cs <sub>2</sub> CO <sub>3</sub>       | 65%                | 99:1             |
| 5                                                                                    | NaHCO <sub>3</sub>                    | 16%                | /                |
| 6                                                                                    | K <sub>2</sub> HPO <sub>4</sub>       | 42%                | /                |

<sup>a</sup>Reaction condition: styrene (0.2 mmol), redox-active ester (0.3 mmol), Pd(PPh<sub>3</sub>)<sub>2</sub>Cl<sub>2</sub> (5 mol%), Xantphos (6 mol%), **base** (120 mol%) in DMA (2 mL), irradiation by 36W blue LEDs at room temperature for 12 h under argon atmosphere. <sup>b</sup>GC yield using biphenyl as an internal standard.

### 3.4 Optimization of the ratio of reactant <sup>a</sup>



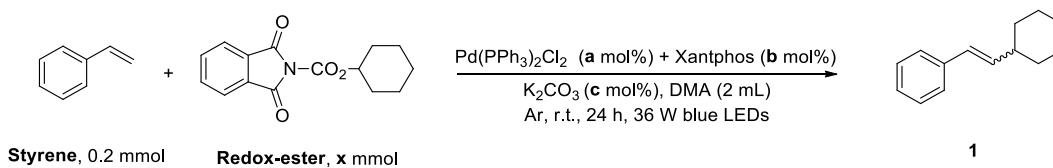

| entry                | a        | b        | c          | x           | yield <sup>b</sup> |
|----------------------|----------|----------|------------|-------------|--------------------|
| 1                    | 5        | 6        | 120        | 0.30        | 88%                |
| 2                    | 3        | 3.6      | 120        | 0.30        | 65%                |
| 3                    | 2        | 2.4      | 120        | 0.30        | 38%                |
| 4                    | 5        | 6        | 100        | 0.30        | 62%                |
| 5                    | 5        | 6        | 150        | 0.30        | 88%                |
| 6                    | 5        | 10       | 120        | 0.30        | 72%                |
| 7                    | 5        | 6        | 120        | 0.24        | 78%                |
| <b>8<sup>c</sup></b> | <b>5</b> | <b>6</b> | <b>120</b> | <b>0.30</b> | <b>96%</b>         |

<sup>a</sup>Reaction condition: styrene (0.2 mmol), redox-active ester (x mmol), Pd(PPh<sub>3</sub>)<sub>2</sub>Cl<sub>2</sub> (a mol%), Xantphos (b mol%), K<sub>2</sub>CO<sub>3</sub> (c mol%) in DMA (2 mL), irradiation by 36W blue LEDs at room temperature for 24 h under argon atmosphere. <sup>b</sup>GC yield using biphenyl as an internal standard. <sup>c</sup>with 1 equiv H<sub>2</sub>O

### 3.5 Screening of ligands <sup>a</sup>

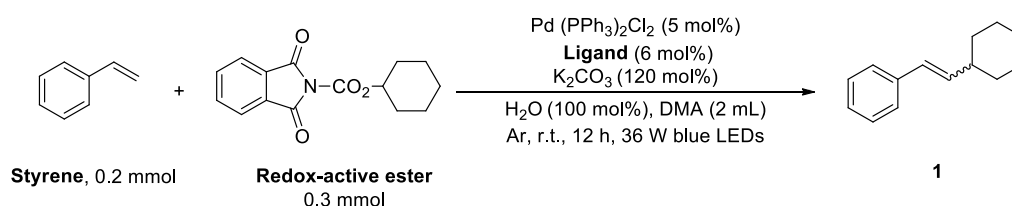

| entry    | Ligand           | yield <sup>b</sup> | <i>E/Z</i> <sup>b</sup> |
|----------|------------------|--------------------|-------------------------|
| <b>1</b> | <b>Xantphos</b>  | <b>96%</b>         | <b>99:1</b>             |
| 2        | Ni-xant-phos     | 72%                | 98:2                    |
| 3        | DPE-phos         | 81%                | 98:2                    |
| 4        | BINAP            | 18 %               | /                       |
| 5        | Tri-phos         | Trace              | /                       |
| 6        | Dtbpy            | 13%                | /                       |
| 7        | Dppbz            | 11%                | /                       |
| 8        | Dppen            | Trace              | /                       |
| 9        | DPPP             | Trace              | /                       |
| 10       | Dppf             | N.R                | /                       |
| 11       | X-phos (12 mol%) | 12%                | /                       |

<sup>a</sup>Reaction condition: styrene (0.2 mmol), redox-active ester (0.3 mmol), Pd(PPh<sub>3</sub>)<sub>2</sub>Cl<sub>2</sub> (5 mol%), ligand (6 mol%), K<sub>2</sub>CO<sub>3</sub> (120 mol%), H<sub>2</sub>O (100 mol%) in DMA (2 mL), irradiation by 36W blue LEDs at room temperature for 24 h under argon atmosphere. <sup>b</sup>GC yield using biphenyl as an internal standard.

### 3.6 Investigation of effect of monophosphine ligands <sup>a</sup>

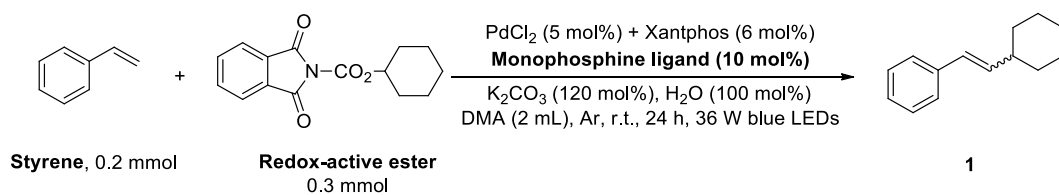

| entry | monophosphine ligand                                  | yield <sup>b</sup> | <i>E/Z</i> <sup>b</sup> |
|-------|-------------------------------------------------------|--------------------|-------------------------|
| 1     | PPh <sub>3</sub>                                      | 96%                | 99:1                    |
| 2     | P(3-OMe-Ph) <sub>3</sub>                              | 66%                | 98:2                    |
| 3     | P(4-OMe-Ph) <sub>3</sub>                              | 85%                | 98:2                    |
| 4     | P(2,4-Me-C <sub>6</sub> H <sub>4</sub> ) <sub>3</sub> | 72%                | 98:2                    |
| 5     | P(4-F-Ph) <sub>3</sub>                                | 83%                | 98:2                    |
| 6     | P(perfluorophenyl) <sub>3</sub>                       | 48%                | /                       |
| 7     | P(furan) <sub>3</sub>                                 | Trace              | /                       |
| 8     | PCy <sub>3</sub>                                      | 33%                | /                       |
| 9     | PPh <sub>3</sub> (20 mol%)                            | 95%                | 99:1                    |
| 10    | PPh <sub>3</sub> (5 mol%)                             | 55%                | 98:2                    |

<sup>a</sup>Reaction condition: styrene (0.2 mmol), redox-active ester (0.3 mmol), PdCl<sub>2</sub> (5 mol%), **monophosphine ligand** (10 mol%), Xantphos (6 mol%), K<sub>2</sub>CO<sub>3</sub> (120 mol%), H<sub>2</sub>O (100 mol%) in DMA (2 mL), irradiation by 36W blue LEDs at room temperature for 24 h under argon atmosphere. <sup>b</sup>GC yield using biphenyl as an internal standard.

### 3.7 Control experiments investigating the necessity of dual ligands<sup>a</sup>

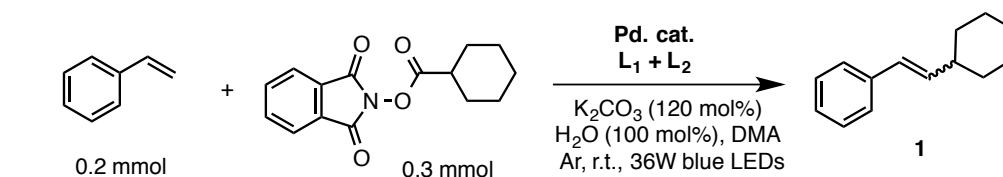

| entry | Pd. cat. (5 mol%)                                  | L <sub>1</sub>             | L <sub>2</sub>     | yield <sup>a</sup> |
|-------|----------------------------------------------------|----------------------------|--------------------|--------------------|
| 1     | Pd(PPh <sub>3</sub> ) <sub>2</sub> Cl <sub>2</sub> | /                          | Xantphos (6 mol%)  | 96%                |
| 2     | PdCl <sub>2</sub>                                  | /                          | Xantphos (6 mol%)  | Trace              |
| 3     | Pd(PPh <sub>3</sub> ) <sub>2</sub> Cl <sub>2</sub> | /                          | /                  | 15%                |
| 4     | PdCl <sub>2</sub>                                  | PPh <sub>3</sub> (20 mol%) | /                  | 33%                |
| 5     | PdCl <sub>2</sub>                                  | /                          | Xantphos (10 mol%) | 16%                |
| 6     | Pd(Xantphos)Cl <sub>2</sub>                        | /                          | /                  | Trace              |
| 7     | Pd(PPh <sub>3</sub> ) <sub>4</sub>                 | /                          | /                  | 21%                |
| 8     | /                                                  | PPh <sub>3</sub> (20 mol%) | /                  | N.R                |
| 9     | /                                                  | /                          | Xantphos (10 mol%) | N.R                |

<sup>a</sup>GC yields using biphenyl as an internal standard.

## 4. General Procedure and Spectral Data

### 4.1 General procedure A

Vinyl arene (1.0 equiv, 0.2 mmol) (if solid), redox active ester (1.5 equiv, 0.3 mmol) (if solid),  $\text{Pd}(\text{PPh}_3)_2\text{Cl}_2$  (5 mol%, 7 mg) and Xantphos (6 mol%, 6.9 mg),  $\text{K}_2\text{CO}_3$  (0.24 mmol, 33 mg) were placed in a transparent Schlenk tube equipped with a stirring bar. The tube was evacuated and filled with argon (three times). To these solids, vinyl arene (1.0 equiv, 0.2 mmol) (if liquid), redox active ester (1.5 equiv, 0.3 mmol) (if liquid), anhydrous DMA (2.0 mL), and  $\text{H}_2\text{O}$  (1 equiv) were added via a gastight syringe under argon atmosphere. The reaction mixture was stirred under the irradiation of a 36 W blue LEDs (distance app. 3.0 cm from the bulb) at room temperature for 24 h. After completion of the reaction, the mixture was quenched with saturated NaCl solution and extracted with ethyl acetate (3 x 10 mL). The organic layers were combined and concentrated under vacuo. The product was purified by flash column chromatography on silica gel with petroleum ether or a mixture of petroleum ether and ethyl acetate as eluent.

### 4.2 General procedure B

Vinyl arene (1.0 equiv, 0.2 mmol) (if solid), Redox active ester (2 equiv, 0.4 mmol) (if solid),  $\text{Pd}(\text{PPh}_3)_2\text{Cl}_2$  (5 mol%, 7 mg) and Xantphos (6 mol%, 6.9 mg),  $\text{K}_2\text{CO}_3$  (0.24 mmol, 33 mg) were placed in a transparent Schlenk tube equipped with a stirring bar. The tube was evacuated and filled with argon (three times). To these solids, vinyl arene (1.0 equiv, 0.2 mmol) (if liquid), redox active ester (1.5 equiv, 0.3 mmol) (if liquid), anhydrous DMA (2.0 mL), and  $\text{H}_2\text{O}$  (1 equiv) were added via a gastight syringe under argon atmosphere. The reaction mixture was stirred under the irradiation of a 36 W Blue LEDs (distance app. 3.0 cm from the bulb) at room temperature for 36 h. The mixture was quenched with saturated NaCl solution and extracted with ethyl acetate (3 x 10 mL). The organic layers were combined and concentrated under vacuo. The product was purified by flash column chromatography on silica gel with petroleum ether or a mixture of petroleum ether and ethyl acetate as eluent.

### 4.3 Spectral Data

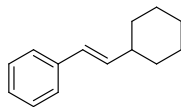

**(E)-(2-cyclohexylvinyl) benzene (1):** Following the general procedure A, obtained in 95% yield as a colorless liquid (35.4 mg, eluent: petroleum ether). (Ref: *Angew. Chem. Int. Ed.* **2014**, 53, 5974)

$^1\text{H}$  NMR (400 MHz,  $\text{CDCl}_3$ )  $\delta$  7.34 (d,  $J = 7.9$  Hz, 2H), 7.27 (t,  $J = 12.5$  Hz, 2H), 7.17 (t,  $J = 7.2$  Hz, 1H), 6.34 (d,  $J = 16.0$  Hz, 1H), 6.17 (dd,  $J = 16.0, 6.9$  Hz, 1H), 2.19 – 2.04 (m, 1H), 1.83 – 1.65 (m, 5H), 1.36 – 1.12 (m, 5H).

$^{13}\text{C}$  NMR (101 MHz,  $\text{CDCl}_3$ )  $\delta$  138.0, 136.8, 128.4, 127.2, 126.7, 125.9, 41.2, 32.9, 26.2, 26.1.

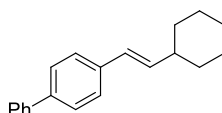

**(E)-4-(2-cyclohexylvinyl)-1,1'-biphenyl (2):** Following the general procedure A, obtained in 96% yield as a white solid (50.4 mg, eluent: petroleum ether). (Ref: *Org. Lett.*, **2016**, 18, 1)

$^1\text{H}$  NMR (400 MHz,  $\text{CDCl}_3$ )  $\delta$  7.58 (d,  $J = 7.7$  Hz, 2H), 7.52 (d,  $J = 8.1$  Hz, 2H), 7.43 – 7.40 (m, 4H), 7.31 (t,  $J = 7.2$  Hz, 1H), 6.37 (d,  $J = 16.0$  Hz, 1H), 6.22 (dd,  $J = 15.9, 6.9$  Hz, 1H), 2.23 – 2.09 (m, 1H), 1.87 – 1.60 (m, 5H), 1.38 – 1.14 (m, 5H).

$^{13}\text{C}$  NMR (101 MHz,  $\text{CDCl}_3$ )  $\delta$  140.9, 139.4, 137.1, 137.0, 128.7, 127.1, 127.0, 126.8, 126.7, 126.3, 41.2, 32.9, 26.1, 26.0.

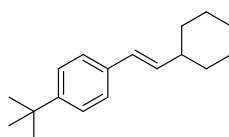

**(E)-1-(tert-butyl)-4-(2-cyclohexylvinyl)benzene (3):** Following the general procedure A, obtained in 94% yield as a colorless liquid (45.5 mg, eluent: petroleum ether). (Ref: *Org. Biomol. Chem.*, **2015**, 13, 6170)

$^1\text{H}$  NMR (400 MHz,  $\text{CDCl}_3$ )  $\delta$  7.32 – 7.27 (m, 4H), 6.32 (d,  $J$  = 15.9 Hz, 1H), 6.13 (dd,  $J$  = 16.0, 7.0 Hz, 1H), 2.19 – 2.05 (m, 1H), 1.80 – 1.65 (m, 5H), 1.36 – 1.13 (m, 14H).

$^{13}\text{C}$  NMR (101 MHz,  $\text{CDCl}_3$ )  $\delta$  149.7, 136.1, 135.3, 126.9, 125.6, 125.3, 41.2, 34.4, 33.0, 31.3, 26.2, 26.1.

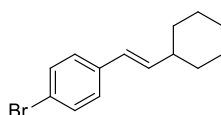

**(E)-1-bromo-4-(2-cyclohexylvinyl)benzene (4):** Following the general procedure A, obtained in 55% yield as a colorless liquid (29.0 mg, eluent: petroleum ether). (Ref: *J. Org. Chem.* **2013**, 9, 1718)

$^1\text{H}$  NMR (400 MHz,  $\text{CDCl}_3$ )  $\delta$  7.39 (d,  $J$  = 8.2 Hz, 2H), 7.20 (d,  $J$  = 8.2 Hz, 2H), 6.27 (d,  $J$  = 16.0 Hz, 1H), 6.16 (dd,  $J$  = 16.0, 6.7 Hz, 1H), 2.20 – 2.04 (m, 1H), 1.82 – 1.64 (m, 5H), 1.34 – 1.14 (m, 5H).

$^{13}\text{C}$  NMR (101 MHz,  $\text{CDCl}_3$ )  $\delta$  137.7, 137.0, 131.5, 127.5, 126.1, 120.3, 41.1, 32.8, 26.1, 26.0.

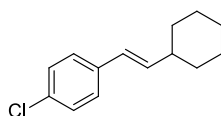

**(E)-1-chloro-4-(2-cyclohexylvinyl)benzene (5):** Following the general procedure A, obtained in 85% yield as a colorless liquid (37.4 mg, eluent: petroleum ether). (Ref: *J. Org. Chem.* **2013**, 9, 1718)

$^1\text{H}$  NMR (400 MHz,  $\text{CDCl}_3$ )  $\delta$  7.27 – 7.22 (m, 4H), 6.28 (d,  $J$  = 16.0 Hz, 1H), 6.14 (dd,  $J$  = 16.0, 6.8 Hz, 1H), 2.15 – 2.08 (m, 1H), 1.84 – 1.65 (m, 5H), 1.35 – 1.13 (m, 5H).

$^{13}\text{C}$  NMR (101 MHz,  $\text{CDCl}_3$ )  $\delta$  137.5, 136.5, 132.2, 128.5, 127.1, 126.1, 41.1, 32.8, 26.1, 26.0.

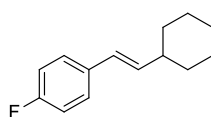

**(E)-1-(2-cyclohexylvinyl)-4-fluorobenzene (6):** Following the general procedure A, obtained in 78% yield as a colorless liquid (31.8 mg, eluent: petroleum ether). (Ref: *Org. Biomol. Chem.*, **2015**, *13*, 6170)

$^1\text{H}$  NMR (400 MHz,  $\text{CDCl}_3$ )  $\delta$  7.35 – 7.27 (m, 2H), 6.97 (t,  $J$  = 8.7 Hz, 2H), 6.30 (d,  $J$  = 16.0 Hz, 1H), 6.08 (dd,  $J$  = 16.0, 7.0 Hz, 1H), 2.17 – 2.04 (m, 1H), 1.85 – 1.64 (m, 5H), 1.35 – 1.14 (m, 5H).

$^{13}\text{C}$  NMR (101 MHz,  $\text{CDCl}_3$ )  $\delta$  161.82 (d,  $J$  = 245.4 Hz), 136.6, 134.2, 127.30 (d,  $J$  = 7.8 Hz), 126.0, 115.26 (d,  $J$  = 21.5 Hz), 41.1, 32.9, 26.1, 26.0.

$^{19}\text{F}$  NMR (376 MHz,  $\text{CDCl}_3$ )  $\delta$  -116.1.

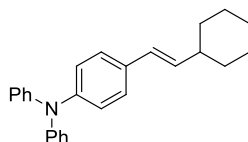

**(E)-4-(2-cyclohexylvinyl)-N, N-diphenylaniline (7):** Following the general procedure A, obtained in 85% yield as a white solid (60.0 mg, eluent: petroleum ether).

$^1\text{H}$  NMR (400 MHz,  $\text{CDCl}_3$ )  $\delta$  7.22 (dd,  $J$  = 11.2, 4.6 Hz, 6H), 7.07 (d,  $J$  = 8.2 Hz, 4H), 7.00 (dd,  $J$  = 7.7, 5.3 Hz, 4H), 6.29 (d,  $J$  = 16.0 Hz, 1H), 6.08 (dd,  $J$  = 16.0, 7.0 Hz, 1H), 2.14 – 2.07 (m, 1H), 1.80 – 1.65 (m, 5H), 1.35 – 1.14 (m, 5H).

$^{13}\text{C}$  NMR (101 MHz,  $\text{CDCl}_3$ )  $\delta$  147.8, 146.5, 135.6, 132.7, 129.2, 126.8, 126.6, 124.3, 124.0, 122.6, 41.2, 33.1, 26.2, 26.1.

HRMS (ESI) Calcd for  $\text{C}_{26}\text{H}_{28}\text{NO}^+$   $[\text{M}+\text{H}]^+$ : 354.2216, found: 354.2211.

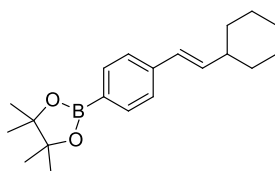

**(E)-2-(4-(2-cyclohexylvinyl)phenyl)-4,4,5,5-tetramethyl-1,3,2-dioxaborolane(8):**

Following the general procedure A, obtained in 96% yield as a colorless liquid (60.0 mg, eluent: petroleum ether:ethyl acetate = 20:1). (Ref: *Tetrahedron Lett.*, **2013**, *54*, 1211)

$^1\text{H}$  NMR (400 MHz,  $\text{CDCl}_3$ )  $\delta$  7.65 (d,  $J = 8.1$  Hz, 2H), 7.26 (d,  $J = 8.0$  Hz, 2H), 6.27 (d,  $J = 16.0$  Hz, 1H), 6.17 (dd,  $J = 16.0, 6.7$  Hz, 1H), 2.01 – 2.08 (m, 1H), 1.74 – 1.58 (m, 5H), 1.26 (s, 12H), 1.23 – 0.97 (m, 5H).

$^{13}\text{C}$  NMR (101 MHz,  $\text{CDCl}_3$ )  $\delta$  140.8, 137.9, 135.0, 127.2, 125.2, 83.6, 41.2, 32.8, 26.1, 26.0, 24.8. The carbon directly attached to the boron atom was not detected due to quadrupolar broadening.

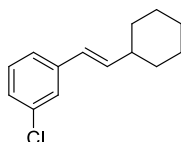

**(E)-1-chloro-3-(2-cyclohexylvinyl) benzene (9):** Following the general procedure A, obtained in 81% yield as a colorless liquid (35.6 mg, eluent: petroleum ether). (Ref: *Chem. Commun.*, **2015**, 51, 7546)

$^1\text{H}$  NMR (400 MHz,  $\text{CDCl}_3$ )  $\delta$  7.33 (s, 1H), 7.20 – 7.14 (m, 3H), 6.27 (d,  $J = 16.0$  Hz, 1H), 6.18 (dd,  $J = 16.0, 6.6$  Hz, 1H), 2.15 – 2.08 (m, 1H), 1.80 – 1.66 (m, 5H), 1.36 – 1.16 (m, 5H).

$^{13}\text{C}$  NMR (101 MHz,  $\text{CDCl}_3$ )  $\delta$  139.9, 138.4, 134.4, 129.6, 126.6, 126.0, 125.8, 124.2, 41.1, 32.8, 26.1, 26.0.

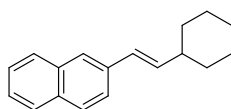

**(E)-2-(2-cyclohexylvinyl)naphthalene(10) :** Following the general procedure A, obtained in 85% yield as a white solid (40.1 mg, eluent: petroleum ether).

$^1\text{H}$  NMR (400 MHz,  $\text{CDCl}_3$ )  $\delta$  7.78 – 7.74 (m, 3H), 7.67 (s, 1H), 7.58 (dd,  $J = 8.5, 1.6$  Hz, 1H), 7.47 – 7.36 (m, 2H), 6.50 (d,  $J = 16.0$  Hz, 1H), 6.30 (dd,  $J = 16.0, 6.9$  Hz, 1H), 2.21 – 2.14 (m, 1H), 1.89 – 1.66 (m, 5H), 1.36 – 1.17 (m, 5H).

$^{13}\text{C}$  NMR (101 MHz,  $\text{CDCl}_3$ )  $\delta$  137.4, 135.5, 133.7, 132.6, 128.0, 127.9, 127.7, 127.3, 126.1, 125.5, 125.4, 123.6, 41.3, 33.0, 26.2, 26.1.

HRMS (EI) Calcd for  $\text{C}_{18}\text{H}_{20}^+$   $[\text{M}]^+$ : 236.1565, found: 236.1552.

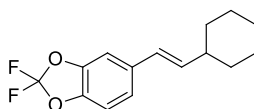

**(E)-5-(2-cyclohexylvinyl)-2,2-difluorobenzo[d][1,3]dioxole (11):** Following the general procedure A, obtained in 55% yield as a colorless liquid (29.3 mg, eluent: petroleum ether:ethyl acetate = 20:1).

$^1\text{H}$  NMR (400 MHz,  $\text{CDCl}_3$ )  $\delta$  7.08 (d,  $J = 1.5$  Hz, 1H), 6.97 (dt,  $J = 14.3, 4.9$  Hz, 2H), 6.28 (d,  $J = 16.0$  Hz, 1H), 6.07 (dd,  $J = 15.9, 6.9$  Hz, 1H), 2.17 – 2.07 (m, 1H), 1.83 – 1.66 (m, 5H), 1.36 – 1.13 (m, 5H).

$^{13}\text{C}$  NMR (101 MHz,  $\text{CDCl}_3$ )  $\delta$  144.2, 142.5, 137.3, 134.7, 131.63 (t,  $J = 254.6$  Hz), 126.0, 121.7, 109.2, 106.3, 41.1, 32.9, 26.1, 26.0.

$^{19}\text{F}$  NMR (376 MHz,  $\text{CDCl}_3$ )  $\delta$  -50.3.

HRMS (EI) Calcd for  $\text{C}_{15}\text{H}_{16}\text{F}_2\text{O}_2^+ [\text{M}]^+$ : 266.1118, found: 266.1105

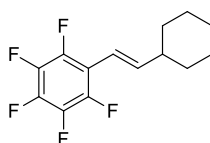

**(E)-1-(2-cyclohexylvinyl)-2,3,4,5,6-pentafluorobenzene (12):** Following the general procedure A, obtained in 75% yield as a colorless liquid (41.4 mg, eluent: petroleum ether).

$^1\text{H}$  NMR (400 MHz,  $\text{CDCl}_3$ )  $\delta$  6.50 (dd,  $J = 16.4, 7.2$  Hz, 1H), 6.22 (dd,  $J = 16.4, 1.1$  Hz, 1H), 2.22 – 2.11 (m, 1H), 1.85 – 1.66 (m, 5H), 1.38 – 1.16 (m, 5H).

$^{13}\text{C}$  NMR (101 MHz,  $\text{CDCl}_3$ )  $\delta$  146.58 (td,  $J = 7.4, 2.3$  Hz), 144.8 (dm,  $J = 249.0$  Hz), 139.3 (dm,  $J = 256.5$  Hz), 137.7 (dm,  $J = 251.3$  Hz), 112.80 (td,  $J = 14.0, 3.8$  Hz), 111.8, 42.5, 32.5, 26.0, 25.9.

$^{19}\text{F}$  NMR (376 MHz,  $\text{CDCl}_3$ )  $\delta$  -143.8 (dd,  $J = 21.8, 7.8$  Hz), -158.2 (t,  $J = 20.9$  Hz), -163.2 – -164.1 (m).

HRMS (ESI) Calcd for  $\text{C}_{14}\text{H}_{14}\text{F}_5^+ [\text{M}+\text{H}]^+$ : 277.1010, found: 277.1016.

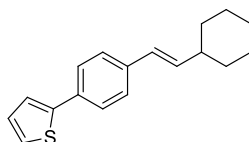



**(E)-2-(4-(2-cyclohexylvinyl)phenyl)thiophene (13):** Following the general procedure A, obtained in 90% yield as a white solid (49.8 mg, eluent: petroleum ether:ethyl acetate = 20:1).

$^1\text{H}$  NMR (400 MHz,  $\text{CDCl}_3$ )  $\delta$  7.53 (d,  $J$  = 8.3 Hz, 2H), 7.34 (d,  $J$  = 8.3 Hz, 2H), 7.28 (dd,  $J$  = 3.6, 1.1 Hz, 1H), 7.26 – 7.22 (m, 1H), 7.06 (dd,  $J$  = 5.1, 3.6 Hz, 1H), 6.33 (d,  $J$  = 16.0 Hz, 1H), 6.19 (dd,  $J$  = 16.0, 6.9 Hz, 1H), 2.17 – 2.09 (m, 1H), 1.84 – 1.66 (m, 5H), 1.36 – 1.13 (m, 5H).

$^{13}\text{C}$  NMR (101 MHz,  $\text{CDCl}_3$ )  $\delta$  144.4, 137.3, 137.1, 132.8, 128.0, 126.7, 126.4, 125.9, 124.5, 122.7, 41.2, 32.9, 26.2, 26.1.

HRMS (EI) Calcd for  $\text{C}_{18}\text{H}_{20}\text{S}^+ [\text{M}]^+$ : 268.1286, found: 268.1274.

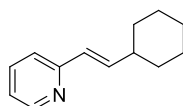

**(E)-2-(2-cyclohexylvinyl)pyridine (14):** Following the general procedure A, obtained in 85% yield as a colorless liquid (31.8 mg, eluent: petroleum ether:ethyl acetate = 20:1). (Ref: *Angew. Chem. Int. Ed.* **2014**, 53, 5974)

$^1\text{H}$  NMR (400 MHz,  $\text{CDCl}_3$ )  $\delta$  8.53 (d,  $J$  = 4.2 Hz, 1H), 7.60 (t,  $J$  = 7.7 Hz, 1H), 7.25 (d,  $J$  = 7.9 Hz, 1H), 7.14 – 7.03 (m, 1H), 6.70 (dd,  $J$  = 15.9, 6.9 Hz, 1H), 6.45 (d,  $J$  = 16.9 Hz, 1H), 2.23 – 2.15 (m, 1H), 1.87 – 1.65 (m, 5H), 1.36 – 1.16 (m, 5H).

$^{13}\text{C}$  NMR (101 MHz,  $\text{CDCl}_3$ )  $\delta$  156.3, 149.3, 141.5, 136.4, 127.3, 121.5, 121.1, 41.0, 32.6, 26.1, 26.0.

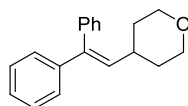

**4-(2,2-diphenylvinyl)tetrahydro-2H-pyran (15):** Following the general procedure A, obtained in 61% yield as a white solid (32.2 mg, eluent: petroleum ether:ethyl acetate = 20:1).

$^1\text{H}$  NMR (400 MHz,  $\text{CDCl}_3$ )  $\delta$  7.39 – 7.30 (m, 3H), 7.27 – 7.10 (m, 7H), 5.89 (d,  $J$  = 9.8 Hz, 1H), 3.91 (d,  $J$  = 11.3 Hz, 2H), 3.29 (td,  $J$  = 11.2, 4.0 Hz, 2H), 2.49 – 2.27 (m, 1H), 1.63 – 1.47 (m, 4H).

<sup>13</sup>C NMR (101 MHz, CDCl<sub>3</sub>) δ 137.5, 134.6, 128.5, 128.2, 127.1, 126.0, 67.7, 38.4, 32.6.

HRMS (ESI) Calcd for C<sub>19</sub>H<sub>21</sub>O<sup>+</sup> [M+H]<sup>+</sup>: 265.1587, found: 265.1581.

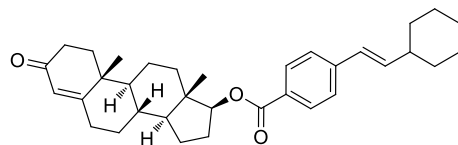

**(8R, 9S, 10R, 13S, 14S, 17S)-10, 13-dimethyl-3-oxo-2, 3, 6, 7, 8, 9, 10, 11, 12, 13, 14, 15, 16, 17-tetradecahydro-1H-cyclopenta[a]phenanthren-17-yl 4-((E)-2-cyclohexyl vinyl) benzoate (16):** Following the general procedure A, obtained in 82% yield as a white solid (82.0 mg, eluent: petroleum ether:ethyl acetate = 20:1).

<sup>1</sup>H NMR (400 MHz, CDCl<sub>3</sub>) δ 7.95 (d, *J* = 8.0 Hz, 2H), 7.39 (d, *J* = 8.0 Hz, 2H), 6.33 (dt, *J* = 16.0, 11.3 Hz, 2H), 5.74 (s, 1H), 4.84 (t, *J* = 8.3 Hz, 1H), 2.49 – 2.25 (m, 5H), 1.91 – 1.58 (m, 12H), 1.49 – 0.95 (m, 19H).

<sup>13</sup>C NMR (101 MHz, CDCl<sub>3</sub>) δ 199.5, 171.0, 166.4, 142.6, 139.7, 129.8, 128.7, 126.6, 125.8, 124.0, 82.8, 53.7, 50.3, 42.9, 41.3, 38.6, 36.7, 35.7, 35.5, 33.9, 32.8, 31.5, 29.7, 27.7, 26.1, 26.0, 23.6, 20.6, 17.4, 12.3.

HRMS (ESI) Calcd for C<sub>33</sub>H<sub>45</sub>O<sub>3</sub><sup>+</sup> [M+H]<sup>+</sup>: 501.3363, found: 501.3359.

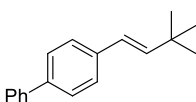

**(E)-4-(3,3-dimethylbut-1-en-1-yl)-1,1'-biphenyl (17):** Following the general procedure A, obtained in 94% yield as a white solid (44.4 mg, eluent: petroleum ether).

<sup>1</sup>H NMR (400 MHz, CDCl<sub>3</sub>) δ 7.59 (d, *J* = 7.7 Hz, 2H), 7.54 (d, *J* = 8.0 Hz, 2H), 7.44 – 7.41 (m, 4H), 7.32 (t, *J* = 7.2 Hz, 1H), 6.38 – 6.26 (m, 2H), 1.14 (s, 9H).

<sup>13</sup>C NMR (101 MHz, CDCl<sub>3</sub>) δ 142.0, 140.9, 139.5, 137.1, 128.7, 127.2, 127.1, 126.9, 126.4, 124.1, 33.4, 29.6.

HRMS (EI) Calcd for C<sub>18</sub>H<sub>20</sub><sup>+</sup> [M]<sup>+</sup>: 236.1565, found: 236.1560.

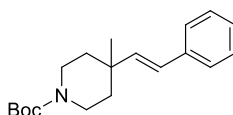

**(E)-tert-butyl 4-methyl-4-styrylpiperidine-1-carboxylate (18):** Following the general procedure A, obtained in 95% yield as a colorless liquid (57.2 mg, eluent: petroleum ether:ethyl acetate = 20:1).

$^1\text{H}$  NMR (400 MHz,  $\text{CDCl}_3$ )  $\delta$  7.43 – 7.15 (m, 5H), 6.35 (d,  $J$  = 16.4 Hz, 1H), 6.17 (d,  $J$  = 16.4 Hz, 1H), 3.58 – 3.30 (m, 4H), 1.68 (d,  $J$  = 4.2 Hz, 2H), 1.46 (s, 11H), 1.13 (s, 3H).

$^{13}\text{C}$  NMR (101 MHz,  $\text{CDCl}_3$ )  $\delta$  155.0, 138.5, 137.6, 128.5, 127.3, 127.3, 126.0, 79.3, 40.4, 36.9, 34.8, 28.5, 26.8.

HRMS (ESI) Calcd for  $\text{C}_{19}\text{H}_{28}\text{NO}_2^+$   $[\text{M}+\text{H}]^+$ : 302.2115, found: 302.2109.

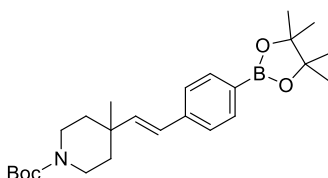

**(E)-2-(4-(3,3-dimethylbut-1-en-1-yl)phenyl)-4,4,5,5-tetramethyl-1,3,2-dioxaborolane (19):** 4,4,5,5-tetramethyl-2-(4-vinylphenyl)-1,3,2-dioxaborolane (1.0 equiv, 5 mmol), redox active ester (1.5 equiv, 7.5 mmol),  $\text{Pd}(\text{PPh}_3)_2\text{Cl}_2$  (5 mol%, 175 mg) and Xant-phos (6 mol%, 258 mg),  $\text{K}_2\text{CO}_3$  (6 mmol, 828 mg) were placed in a transparent Schlenk tube equipped with a stirring bar. The tube was evacuated and filled with argon (three times). To these solids, anhydrous DMA (50 mL) and  $\text{H}_2\text{O}$  (1 equiv) were added via a gastight syringe under argon atmosphere. The reaction mixture was stirred under the irradiation of a 36 W blue LEDs (distance app. 3.0 cm from the irradiation source) at room temperature for 48 h. The product was obtained in 78% yield as a white solid (1.67g, eluent: petroleum ether: ethyl acetate = 20:1). (Ref: *Macromolecules*, **2005**, 38, 8987)

$^1\text{H}$  NMR (400 MHz,  $\text{CDCl}_3$ )  $\delta$  7.75 (d,  $J$  = 7.7 Hz, 2H), 7.35 (d,  $J$  = 7.7 Hz, 2H), 6.35 (d,  $J$  = 16.4 Hz, 1H), 6.22 (d,  $J$  = 16.4 Hz, 1H), 3.41 (dt,  $J$  = 13.2, 11.4 Hz, 4H), 1.74 – 1.64 (m, 2H), 1.50 – 1.42 (m, 11H), 1.33 (s, 12H), 1.12 (s, 3H).

$^{13}\text{C}$  NMR (101 MHz,  $\text{CDCl}_3$ )  $\delta$  154.9, 140.4, 139.7, 135.1, 127.4, 125.3, 83.7, 79.3, 40.4, 36.9, 34.9, 28.5, 26.7, 24.8. The carbon directly attached to the boron atom was not detected due to quadrupolar broadening.

HRMS (ESI) Calcd for  $\text{C}_{25}\text{H}_{38}\text{BNO}_4\text{Na}^+$   $[\text{M}+\text{Na}]^+$ : 450.2786, found: 450.2782

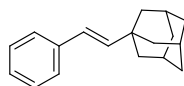

**(3r,5r,7r)-1-((E)-styryl)adamantane (20):** Following the general procedure A, obtained in 85% yield as a colorless liquid (40.5mg, eluent: petroleum ether). (Ref: *RSC Adv.*, **2013**, 3, 19264)

$^1\text{H}$  NMR (400 MHz,  $\text{CDCl}_3$ )  $\delta$  7.35 (d,  $J = 7.7$  Hz, 2H), 7.28 (t,  $J = 7.5$  Hz, 2H), 7.17 (t,  $J = 7.1$  Hz, 1H), 6.24 (d,  $J = 16.3$  Hz, 1H), 6.11 (d,  $J = 22.5$  Hz, 1H), 2.02 (s, 3H), 1.78 – 1.66 (m, 12H).

$^{13}\text{C}$  NMR (101 MHz,  $\text{CDCl}_3$ )  $\delta$  142.1, 138.2, 128.4, 126.7, 125.9, 124.5, 42.2, 36.9, 35.1, 28.5.

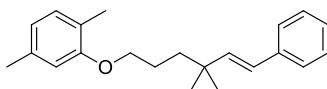

**(E)-2-((4,4-dimethyl-6-phenylhex-5-en-1-yl)oxy)-1,4-dimethylbenzene (21):**

Following the general procedure A, obtained in 91% yield as a colorless liquid (56.1mg, eluent: petroleum ether:ethyl acetate = 20:1).

$^1\text{H}$  NMR (400 MHz,  $\text{CDCl}_3$ )  $\delta$  7.34 – 7.16 (m, 4H), 7.14 – 7.06 (m, 1H), 6.91 (d,  $J = 7.0$  Hz, 1H), 6.61 – 6.46 (m, 2H), 6.24 (d,  $J = 16.3$  Hz, 1H), 6.11 (dd,  $J = 16.6, 6.5$  Hz, 1H), 3.82 (t,  $J = 6.1$  Hz, 2H), 2.20 (s, 3H), 2.10 (s, 3H), 1.74 – 1.61 (m, 2H), 1.53 – 1.43 (m, 2H), 1.06 (s, 6H).

$^{13}\text{C}$  NMR (101 MHz,  $\text{CDCl}_3$ )  $\delta$  156.0, 139.2, 136.9, 135.4, 129.2, 127.4, 125.8, 125.1, 125.0, 122.5, 119.5, 110.9, 67.3, 38.3, 35.1, 26.2, 23.9, 20.4, 14.8.

HRMS (ESI) Calcd for  $\text{C}_{22}\text{H}_{28}\text{ONa}^+$   $[\text{M}+\text{Na}]^+$ : 331.2032, found: 331.2025.

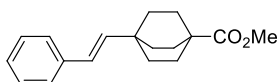

**(E)-methyl 4-styrylbicyclo[2.2.2]octane-1-carboxylate (22):** Following the general procedure A, obtained in 75% yield as a white solid (40.5 mg, eluent: petroleum ether:ethyl acetate = 20:1).

$^1\text{H}$  NMR (400 MHz,  $\text{CDCl}_3$ )  $\delta$  7.26 (d,  $J = 7.6$  Hz, 2H), 7.21 (t,  $J = 8.9$  Hz, 2H), 7.11 (t,  $J = 7.1$  Hz, 1H), 6.17 (d,  $J = 16.3$  Hz, 1H), 6.05 (d,  $J = 16.3$  Hz, 1H), 3.58 (s, 3H), 1.83 – 1.73 (m, 6H), 1.60 – 1.51 (m, 6H).

$^{13}\text{C}$  NMR (101 MHz,  $\text{CDCl}_3$ )  $\delta$  177.4, 138.1, 136.8, 127.5, 125.9, 124.9, 124.8, 50.7, 38.1, 32.3, 29.7, 27.3.

HRMS (ESI) Calcd for  $\text{C}_{18}\text{H}_{22}\text{NaO}_2^+$   $[\text{M}+\text{Na}]^+$ : 293.1512, found: 293.1508.

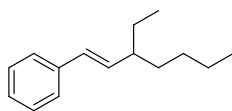

**(E)-(3-ethylhept-1-en-1-yl)benzene (23):** Following the general procedure A, obtained in 72% yield as a colorless liquid (29.1 mg, eluent: petroleum ether). (Ref: *RSC Adv.*, **2013**, 3, 19264)

$^1\text{H}$  NMR (400 MHz,  $\text{CDCl}_3$ )  $\delta$  7.36 (d,  $J = 7.4$  Hz, 2H), 7.29 (t,  $J = 7.5$  Hz, 2H), 7.18 (t,  $J = 7.2$  Hz, 1H), 6.32 (d,  $J = 15.8$  Hz, 1H), 5.95 (dd,  $J = 15.8, 9.0$  Hz, 1H), 2.08 – 1.95 (m, 1H), 1.54 – 1.43 (m, 2H), 1.37 – 1.21 (m, 6H), 0.90 – 0.82 (m,  $J = 7.4$  Hz, 6H).

$^{13}\text{C}$  NMR (101 MHz,  $\text{CDCl}_3$ )  $\delta$  138.0, 135.6, 129.6, 128.4, 126.7, 125.9, 45.2, 34.9, 29.6, 28.2, 22.9, 14.1, 11.9.

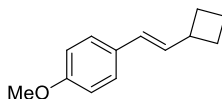

**(E)-4-(2-cyclobutylvinyl)-1,1'-biphenyl (24):** Following the general procedure A, obtained in 78% yield as a colorless liquid (29.3 mg, eluent: petroleum ether).

$^1\text{H}$  NMR (400 MHz,  $\text{CDCl}_3$ )  $\delta$  7.19 (d,  $J = 6.3$  Hz, 2H), 6.76 (d,  $J = 8.7$  Hz, 2H), 6.23 – 6.05 (m, 2H), 3.72 (s, 3H), 3.08 – 2.94 (m, 1H), 2.14 – 2.03 (m, 2H), 1.92 – 1.72 (m, 4H).

$^{13}\text{C}$  NMR (101 MHz,  $\text{CDCl}_3$ )  $\delta$  158.6, 133.2, 130.6, 127.0, 126.9, 113.9, 55.2, 38.8, 28.9, 18.5.

HRMS (ESI) Calcd for  $\text{C}_{13}\text{H}_{17}\text{O}^+$   $[\text{M}+\text{H}]^+$ : 189.1274, found: 189.1279.

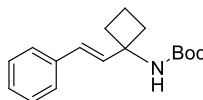

**(E)-tert-butyl (1-styrylcyclobutyl)carbamate (25):** Following the general procedure B, obtained in 55% yield as a white solid (30.0 mg, eluent: petroleum ether:ethyl acetate = 10:1).

$^1\text{H}$  NMR (400 MHz,  $\text{CDCl}_3$ )  $\delta$  7.39 (d,  $J$  = 7.7 Hz, 2H), 7.31 (t,  $J$  = 7.5 Hz, 2H), 7.22 (t,  $J$  = 7.3 Hz, 1H), 6.53 – 6.41 (m, 2H), 4.83 (s, 1H), 2.45 – 2.21 (m, 4H), 2.03 – 1.83 (m, 2H), 1.44 (s, 9H).

$^{13}\text{C}$  NMR (101 MHz,  $\text{CDCl}_3$ )  $\delta$  155.5, 137.1, 133.5, 128.5, 127.3, 126.8, 126.4, 79.4, 57.1, 33.5, 28.4, 15.0,

HRMS (ESI) Calcd for  $\text{C}_{17}\text{H}_{23}\text{NNaO}_2^+$   $[\text{M}+\text{Na}]^+$ : 296.1621, found: 296.1618.

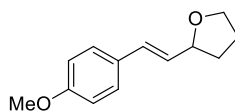

**(E)-2-(4-methoxystyryl)tetrahydrofuran (26):** Following the general procedure B, obtained in 61% yield as a colorless liquid (24.9 mg, eluent: petroleum ether:ethyl acetate = 20:1).

$^1\text{H}$  NMR (400 MHz,  $\text{CDCl}_3$ )  $\delta$  7.31 (d,  $J$  = 8.4 Hz, 2H), 6.84 (d,  $J$  = 8.4 Hz, 2H), 6.53 (d,  $J$  = 15.9 Hz, 1H), 6.07 (dd,  $J$  = 15.7, 6.9 Hz, 1H), 4.44 (q,  $J$  = 6.7 Hz, 1H), 3.96 (dd,  $J$  = 14.7, 7.4 Hz, 1H), 3.87 – 3.77 (m, 4H), 2.15 – 1.89 (m, 3H), 1.76 – 1.67 (m, 1H).

$^{13}\text{C}$  NMR (101 MHz,  $\text{CDCl}_3$ )  $\delta$  159.1, 130.2, 129.6, 128.2, 127.6, 113.9, 79.9, 68.1, 55.3, 32.4, 26.0.

HRMS (ESI) Calcd for  $\text{C}_{13}\text{H}_{17}\text{O}_2^+$   $[\text{M}+\text{H}]^+$ : 205.1223, found: 205.1226.

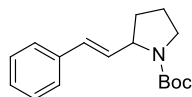

**(E)-tert-butyl 2-styrylpyrrolidine-1-carboxylate (27):** Following the general procedure B, obtained in 75% yield as a white solid (41.5 mg, eluent: petroleum ether:ethyl acetate = 20:1). (Ref: *J. Am. Chem. Soc.*, **2014**, *136*, 11602)

$^1\text{H}$  NMR (400 MHz,  $\text{CDCl}_3$ )  $\delta$  7.38 – 7.27 (m, 4H), 7.21 (t,  $J$  = 7.1 Hz, 1H), 6.40 (d,  $J$  = 15.8 Hz, 1H), 6.09 (dd,  $J$  = 15.7, 6.4 Hz, 1H), 4.43 (s, 1H), 3.52 – 3.38 (m, 2H), 2.13 – 2.08 (m, 1H), 1.96 – 1.76 (m, 3H), 1.43 (s, 9H).

$^{13}\text{C}$  NMR (101 MHz,  $\text{CDCl}_3$ )  $\delta$  154.7, 137.0, 130.7, 127.4, 128.1, 127.3, 126.2, 79.2, 59.0, 46.2, 32.5, 28.5, 23.0.

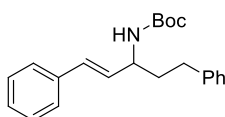

**(E)-tert-butyl (1,5-diphenylpent-1-en-3-yl)carbamate (28):** Following the general procedure B, obtained in 51% yield as a white solid (34.4 mg, eluent: petroleum ether:ethyl acetate = 10:1).

$^1\text{H}$  NMR (400 MHz,  $\text{CDCl}_3$ )  $\delta$  7.40 – 7.09 (m, 10H), 6.44 (d,  $J$  = 15.7 Hz, 1H), 6.03 (dd,  $J$  = 15.7, 6.1 Hz, 1H), 4.54 (s, 1H), 4.25 (s, 1H), 2.65 (t,  $J$  = 7.7 Hz, 2H), 1.86 (d,  $J$  = 7.1 Hz, 2H), 1.39 (s, 9H).

$^{13}\text{C}$  NMR (101 MHz,  $\text{CDCl}_3$ )  $\delta$  155.4, 141.6, 136.8, 130.3, 128.6, 128.5, 128.4, 127.5, 126.4, 125.9, 79.5, 52.3, 37.3, 32.3, 28.4.

HRMS (ESI) Calcd for  $\text{C}_{22}\text{H}_{27}\text{NNaO}_2^+$   $[\text{M}+\text{Na}]^+$ : 360.1934, found: 360.1933.

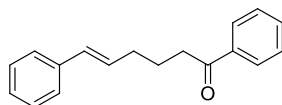

**(E)-1,6-diphenylhex-5-en-1-one (29):** Following the general procedure B, obtained in 54% yield as a colorless liquid (27 mg, eluent: petroleum ether:ethyl acetate = 20:1).

$^1\text{H}$  NMR (400 MHz,  $\text{CDCl}_3$ )  $\delta$  7.94 (t,  $J$  = 10.5 Hz, 2H), 7.55 (t,  $J$  = 7.4 Hz, 1H), 7.45 (t,  $J$  = 7.5 Hz, 2H), 7.36 – 7.24 (m, 4H), 7.19 (t,  $J$  = 7.1 Hz, 1H), 6.41 (d,  $J$  = 15.8 Hz, 1H), 6.22 (dt,  $J$  = 15.8, 6.9 Hz, 1H), 3.02 (t,  $J$  = 7.3 Hz, 2H), 2.32 (q,  $J$  = 7.7 Hz, 2H), 1.99 – 1.87 (m, 2H).

$^{13}\text{C}$  NMR (101 MHz,  $\text{CDCl}_3$ )  $\delta$  200.2, 137.6, 137.0, 132.9, 130.7, 129.9, 128.5, 128.4, 128.0, 126.9, 125.9, 37.7, 32.4, 23.7.

HRMS (ESI) Calcd for  $\text{C}_{18}\text{H}_{18}\text{ONa}^+$   $[\text{M}+\text{Na}]^+$ : 273.1250, found: 273.1249.

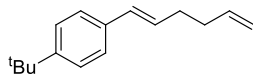

**(E)-1-(tert-butyl)-4-(hexa-1,5-dien-1-yl)benzene (30):** Following the general procedure B, obtained in 61% yield as a colorless liquid (26.1 mg, eluent: petroleum ether). (Ref: *Chem. Commun.* **2012**, 48, 8709)

$^1\text{H}$  NMR (400 MHz,  $\text{CDCl}_3$ )  $\delta$  7.36 – 7.24 (m, 4H), 6.38 (d,  $J$  = 15.8 Hz, 1H), 6.27 – 6.12 (m, 1H), 5.91 – 5.81 (m, 1H), 5.02 (dd,  $J$  = 27.3, 13.6 Hz, 2H), 2.33 – 2.16 (m, 4H), 1.31 (s, 9H).

$^{13}\text{C}$  NMR (101 MHz,  $\text{CDCl}_3$ )  $\delta$  149.9, 138.2, 135.0, 129.9, 129.4, 125.7, 125.4, 115.0, 34.5, 33.7, 32.5, 31.3.

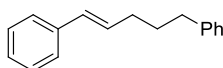

**(E)-pent-1-ene-1,5-diyl dibenzene (31):** Following the general procedure B, obtained in 65% yield as a colorless liquid (28.9 mg, eluent: petroleum ether). (Ref: *Org. Lett.*, **2014**, 16, 1904)

$^1\text{H}$  NMR (400 MHz,  $\text{CDCl}_3$ )  $\delta$  7.38 – 7.12 (m, 10H), 6.39 (d,  $J$  = 15.8 Hz, 1H), 6.23 (dt,  $J$  = 15.8, 6.8 Hz, 1H), 2.74 – 2.56 (m, 2H), 2.27 – 2.22 (m, 2H), 1.88 – 1.72 (m, 2H).

$^{13}\text{C}$  NMR (101 MHz,  $\text{CDCl}_3$ )  $\delta$  142.3, 137.8, 130.5, 130.2, 128.5, 128.3, 126.8, 125.9, 125.7, 35.4, 32.5, 31.0. (one carbon signal is overlapped)

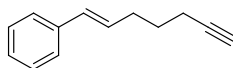

**(E)-hept-1-en-6-yn-1-ylbenzene (32):** Following the general procedure B, obtained in 55% yield as a colorless liquid (18.7 mg, eluent: petroleum ether).



$^1\text{H}$  NMR (400 MHz,  $\text{CDCl}_3$ )  $\delta$  7.35 (d,  $J = 7.5$  Hz, 2H), 7.30 (t,  $J = 7.5$  Hz, 2H), 7.20 (t,  $J = 7.1$  Hz, 1H), 6.43 (d,  $J = 15.9$  Hz, 1H), 6.25 – 6.13 (m, 1H), 2.34 (q,  $J = 7.2$  Hz, 2H), 2.25 (t,  $J = 7.1$  Hz, 2H), 1.98 (s, 1H), 1.72 (p,  $J = 7.1$  Hz, 2H).

$^{13}\text{C}$  NMR (101 MHz,  $\text{CDCl}_3$ )  $\delta$  137.7, 130.7, 129.6, 128.5, 127.0, 126.0, 84.3, 68.5, 31.9, 28.1, 17.9.

HRMS (EI) Calcd for  $\text{C}_{13}\text{H}_{14}^+$   $[\text{M}]^+$ : 170.1096, found: 170.1092.

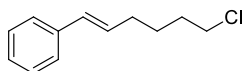

**(*E*)-(6-chlorohex-1-en-1-yl)benzene (33):** Following the general procedure B, obtained in 68% yield as a colorless liquid (26.4 mg, eluent: petroleum ether).

$^1\text{H}$  NMR (400 MHz,  $\text{CDCl}_3$ )  $\delta$  7.37 – 7.27 (m, 4H), 7.20 (t,  $J = 7.2$  Hz, 1H), 6.40 (d,  $J = 15.7$  Hz, 1H), 6.26 – 6.15 (m, 1H), 3.57 (t,  $J = 6.6$  Hz, 2H), 2.25 (q,  $J = 7.1$  Hz, 2H), 1.90 – 1.79 (m, 2H), 1.67 – 1.61 (m, 2H).

$^{13}\text{C}$  NMR (101 MHz,  $\text{CDCl}_3$ )  $\delta$  137.6, 130.4, 130.1, 128.5, 127.0, 126.0, 45.0, 32.2, 32.0, 26.6.

HRMS (ESI) Calcd for  $\text{C}_{12}\text{H}_{16}\text{Cl}^+$   $[\text{M}+\text{H}]^+$ : 195.0935, found: 195.0941.

## 5. Intermolecular kinetic isotope experiment

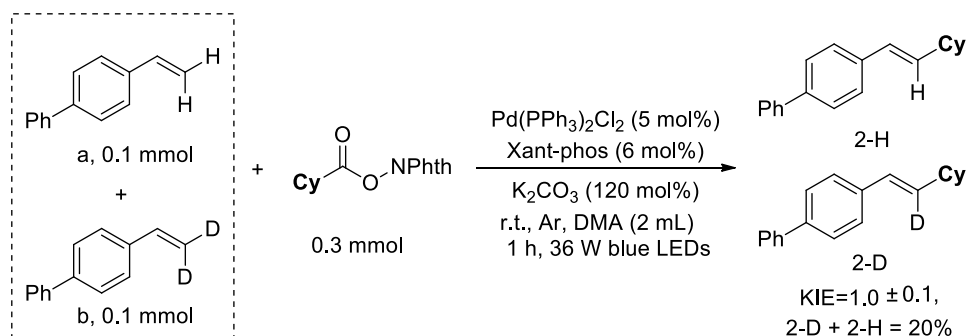

**a** (1.0 equiv, 0.1 mmol), **b** (1.0 equiv, 0.1 mmol), redox active ester (3 equiv, 0.3 mmol), Pd(PPh<sub>3</sub>)<sub>2</sub>Cl<sub>2</sub> (5 mol%, 3.5 mg), Xantphos (6 mol%, 3.5 mg), and K<sub>2</sub>CO<sub>3</sub> (0.24 mmol, 16.5mg) were placed in a transparent Schlenk tube equipped with a stirring bar. The tube was evacuated and filled with argon (three times). To these solids, anhydrous DMA (2.0 mL) were added via a gastight syringe under argon atmosphere. The reaction mixture was stirred under irradiation of 36 W blue LEDs (distance app. 3.0 cm from the LEDs) at room temperature for 1 h. The mixture was quenched with saturated NaCl solution and extracted with ethyl acetate (3 x 10 mL). The organic layers were combined and concentrated under vacuo. Yield and ratio of products were determined by <sup>1</sup>H-NMR using diphenylmethane as internal standard.

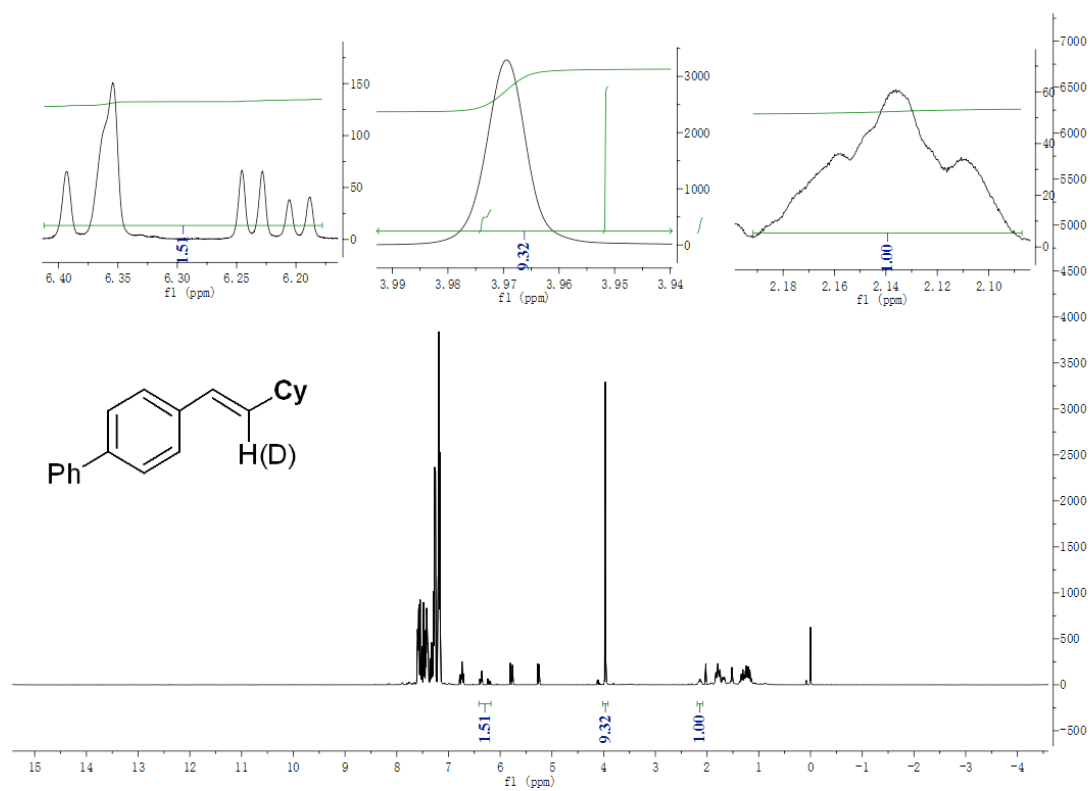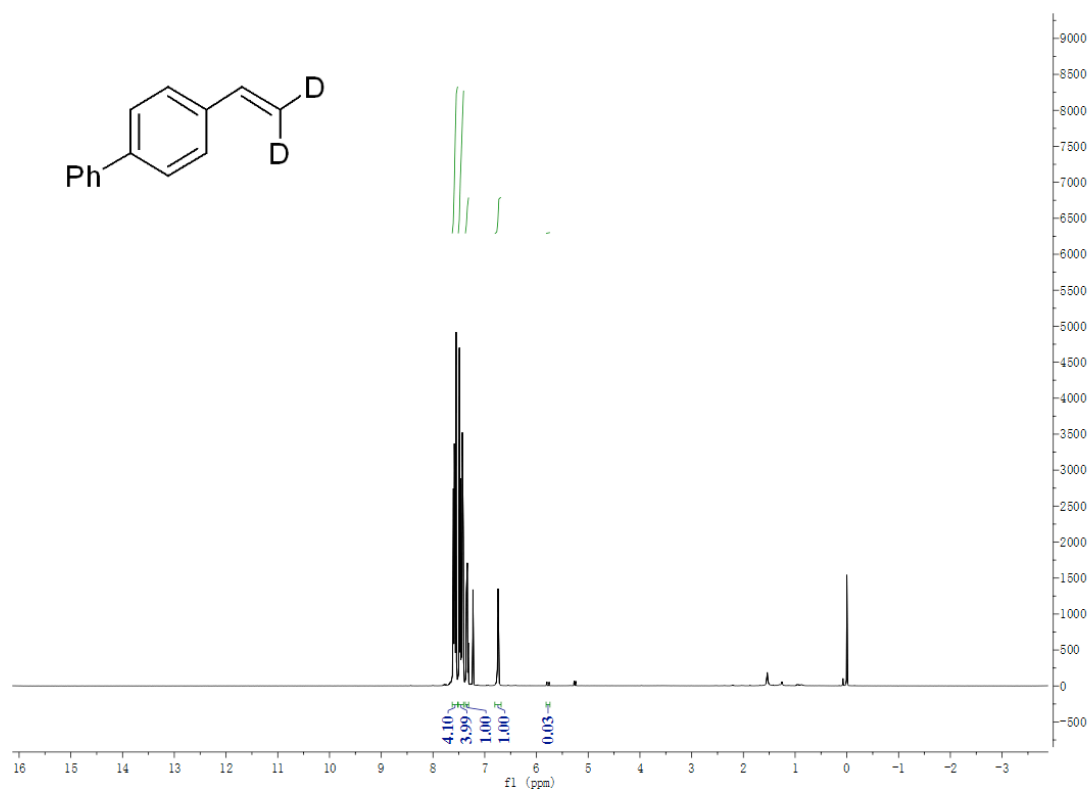

## 6. UV-Vis. Spectrum

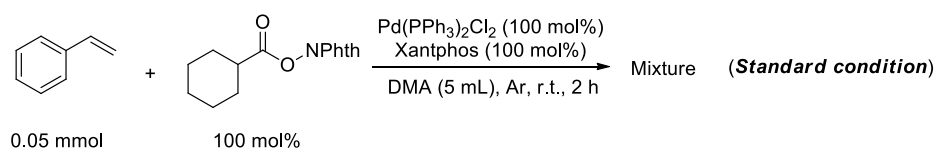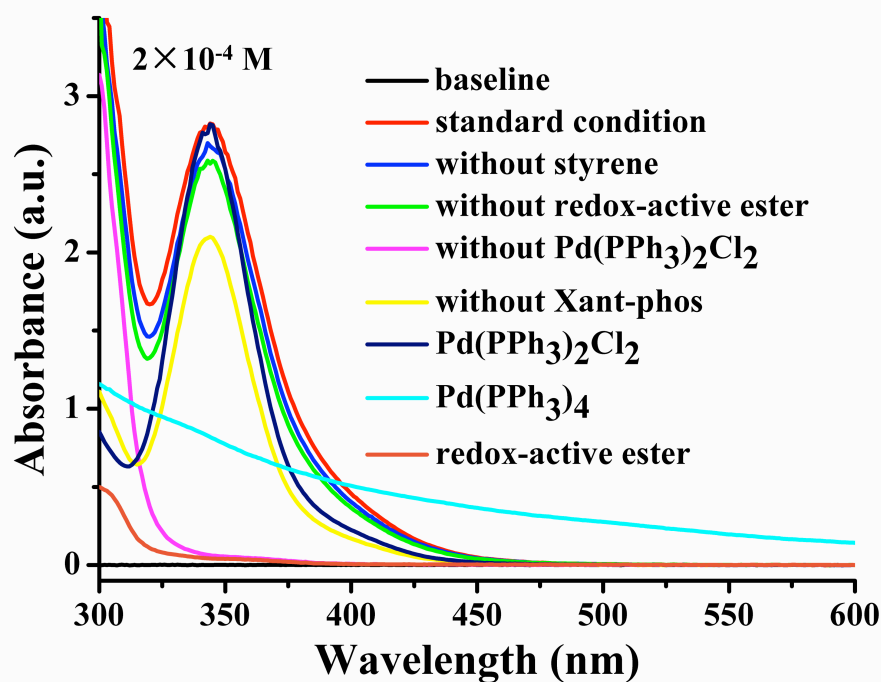

UV/Vis absorption measurements were conducted using a mixture of stoichiometric amount of palladium salt and ligand. UV-Vis absorption onset around 450 nm was observed when measuring the mixture of stoichiometric reaction, suggesting that the palladium complex is excited by the irradiation of blue-LEDs. The absorption is affected by the absence of Xantphos, but not affected by the absence of substrates. N-(acyloxy)phthalimide itself has no absorption in the wavelength range of blue LED irradiation.

## 7. NMR Spectra

### 2-(4-vinylbenzyl)isoindoline-1,3-dione (S-1)

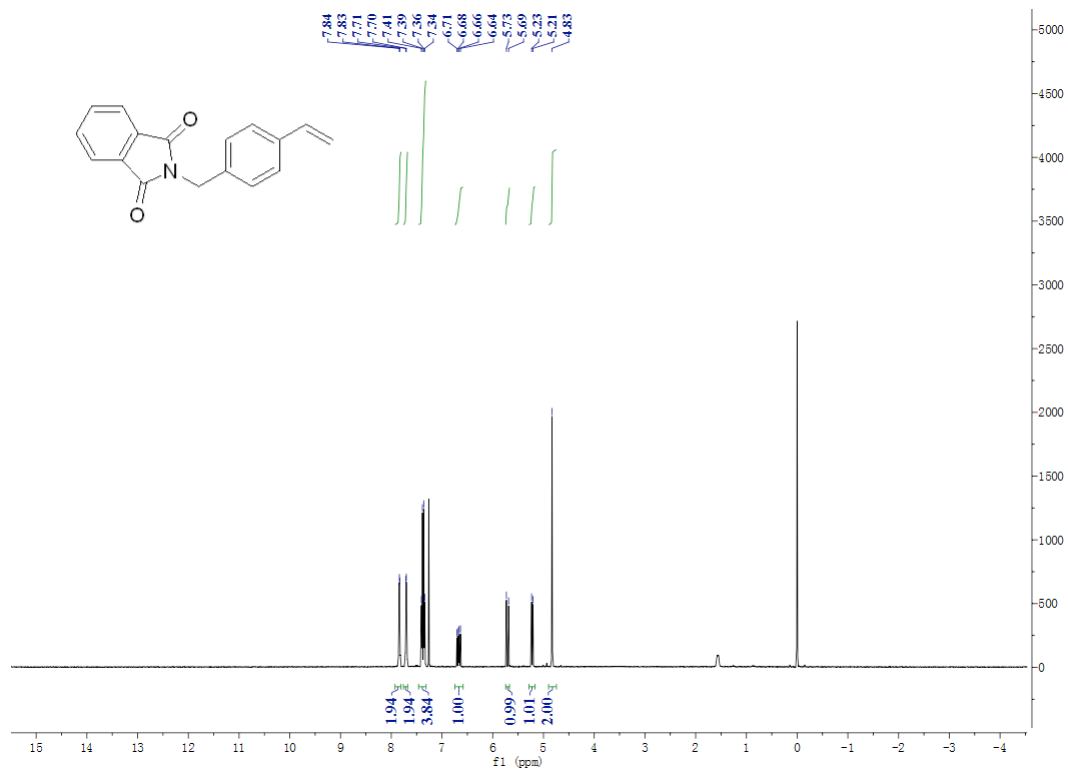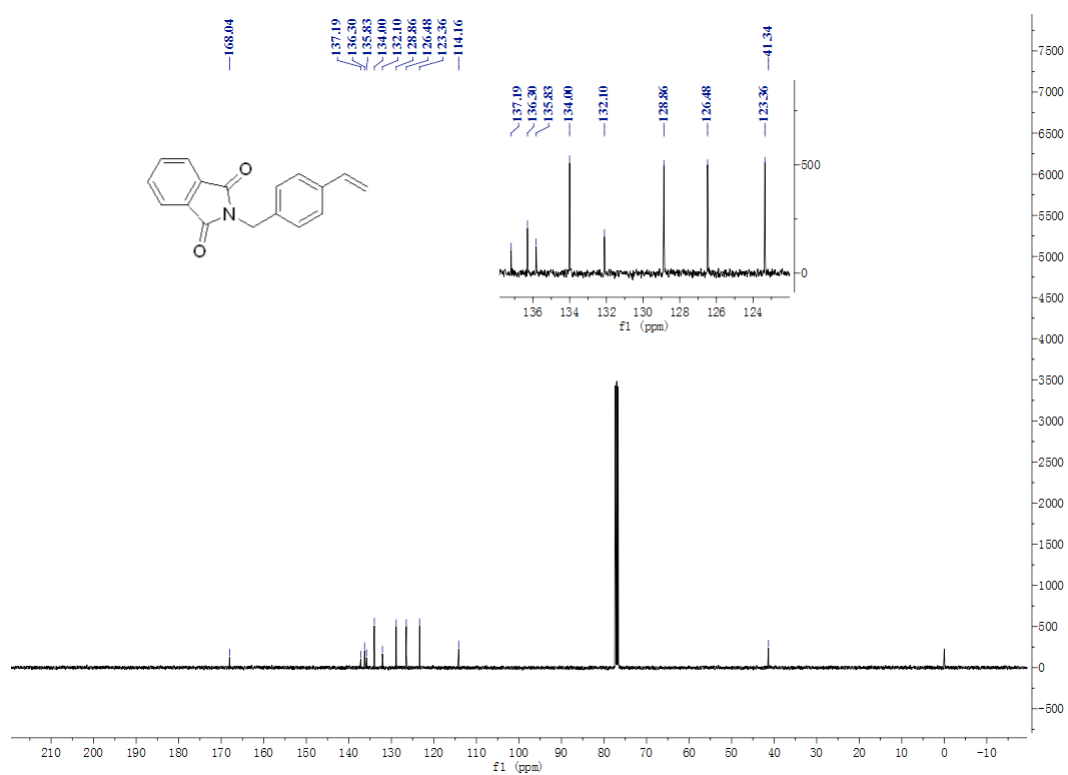

# **N,N-diphenyl-4-vinylaniline (S-2)**

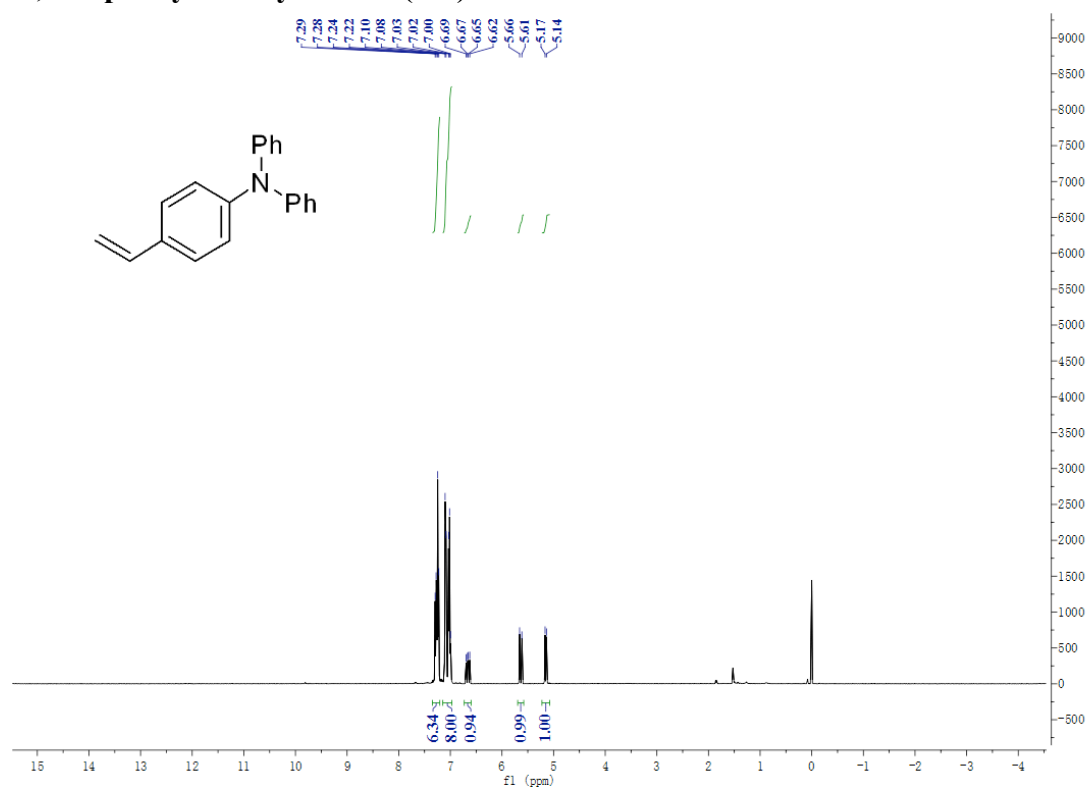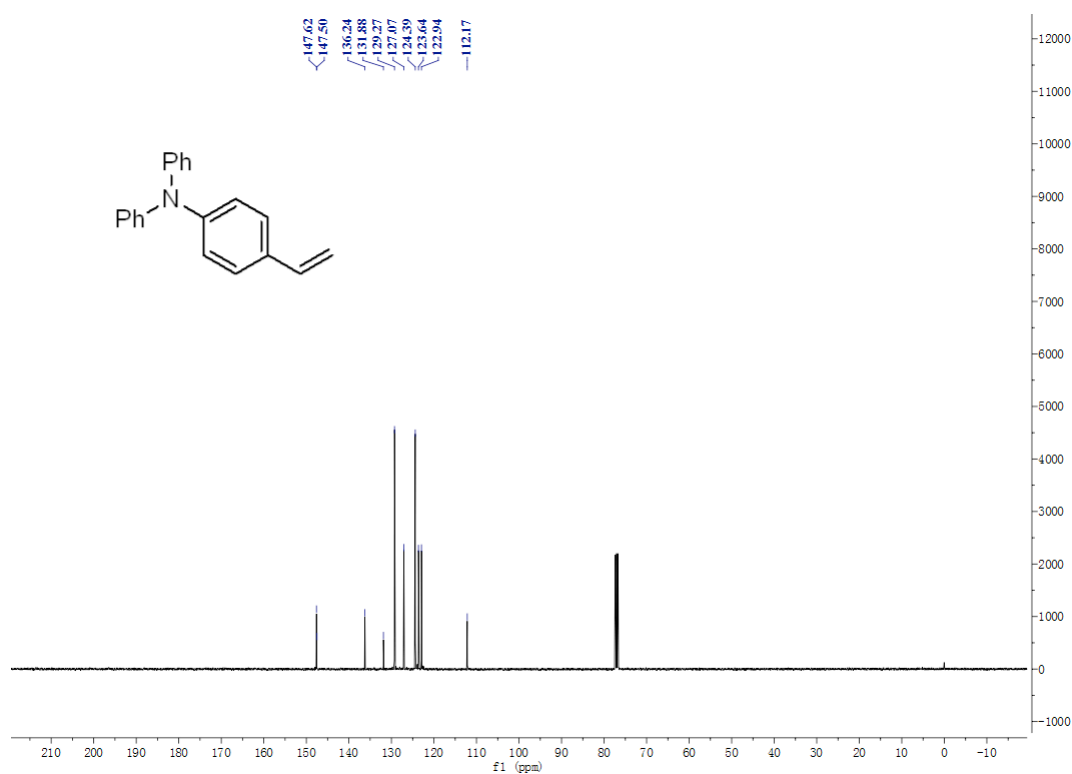

# 2,2-difluoro-5-vinylbenzo[d][1,3]dioxole (S-3)

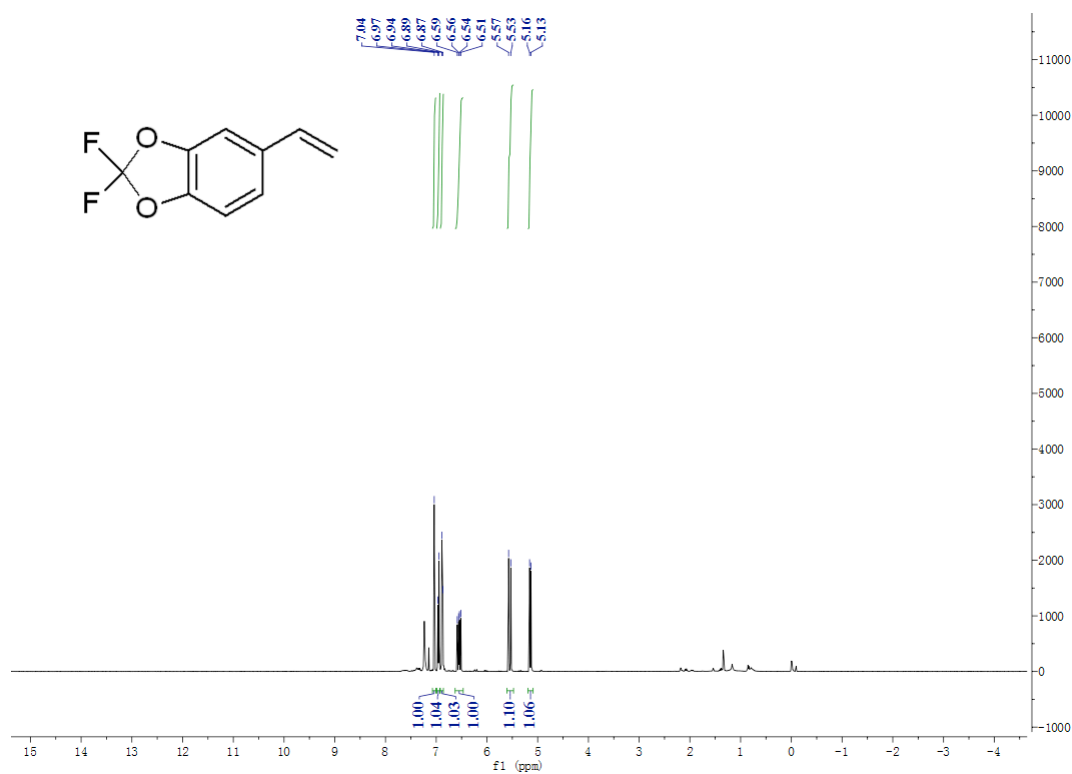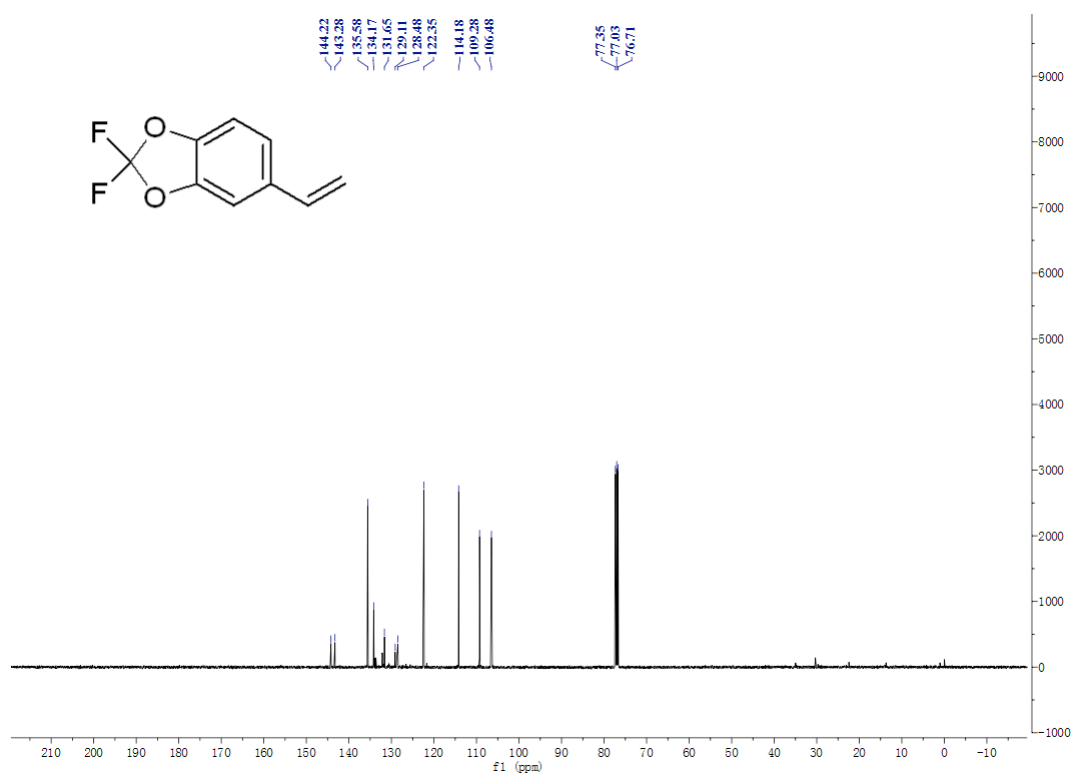

## 2-(4-vinylphenyl)thiophene (S-4)

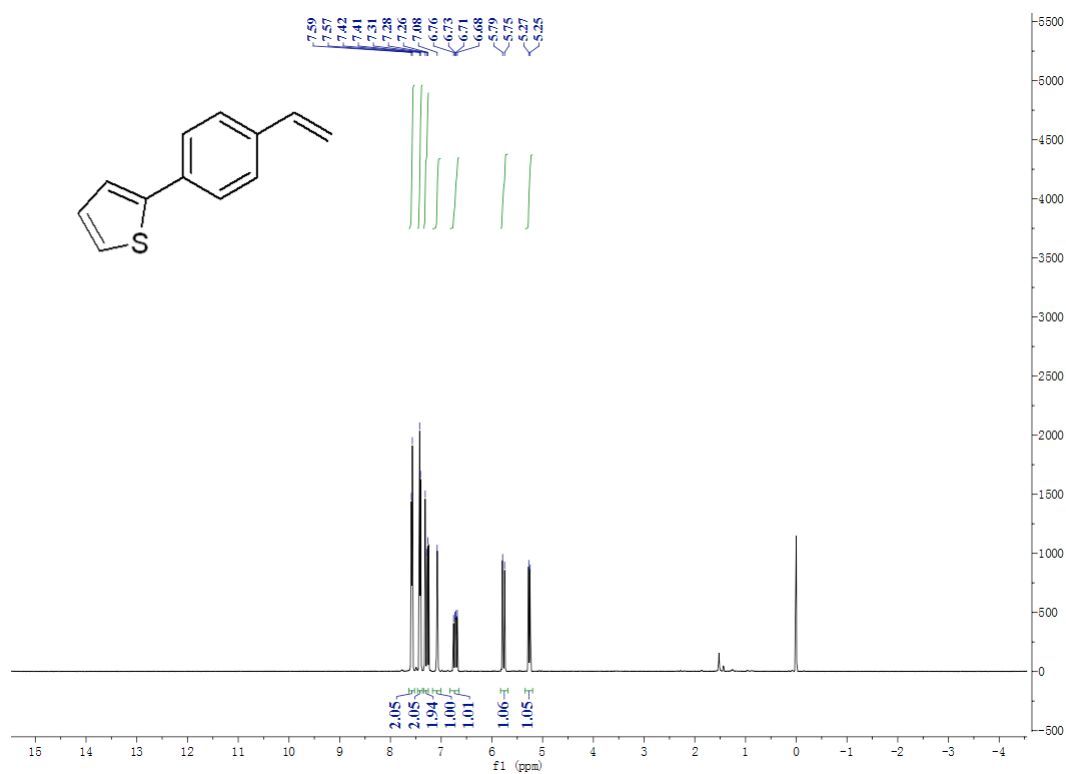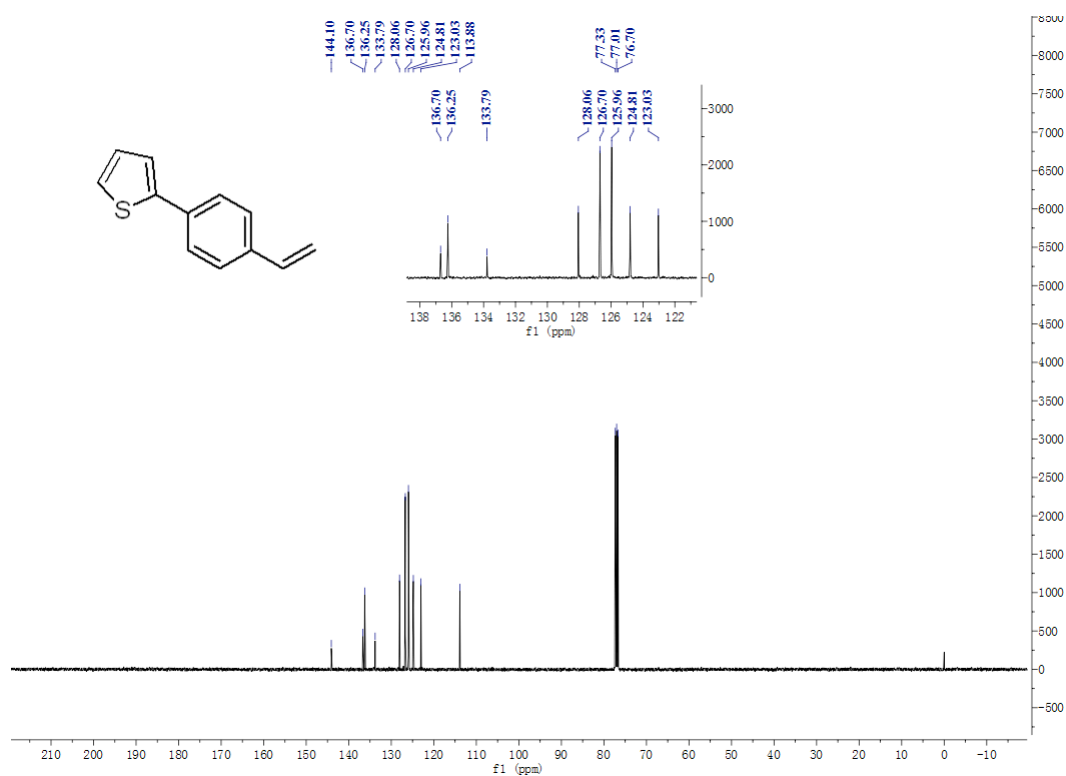



# 4,4,5,5-tetramethyl-2-(4-vinylphenyl)-1,3,2-dioxaborolane (S-5)

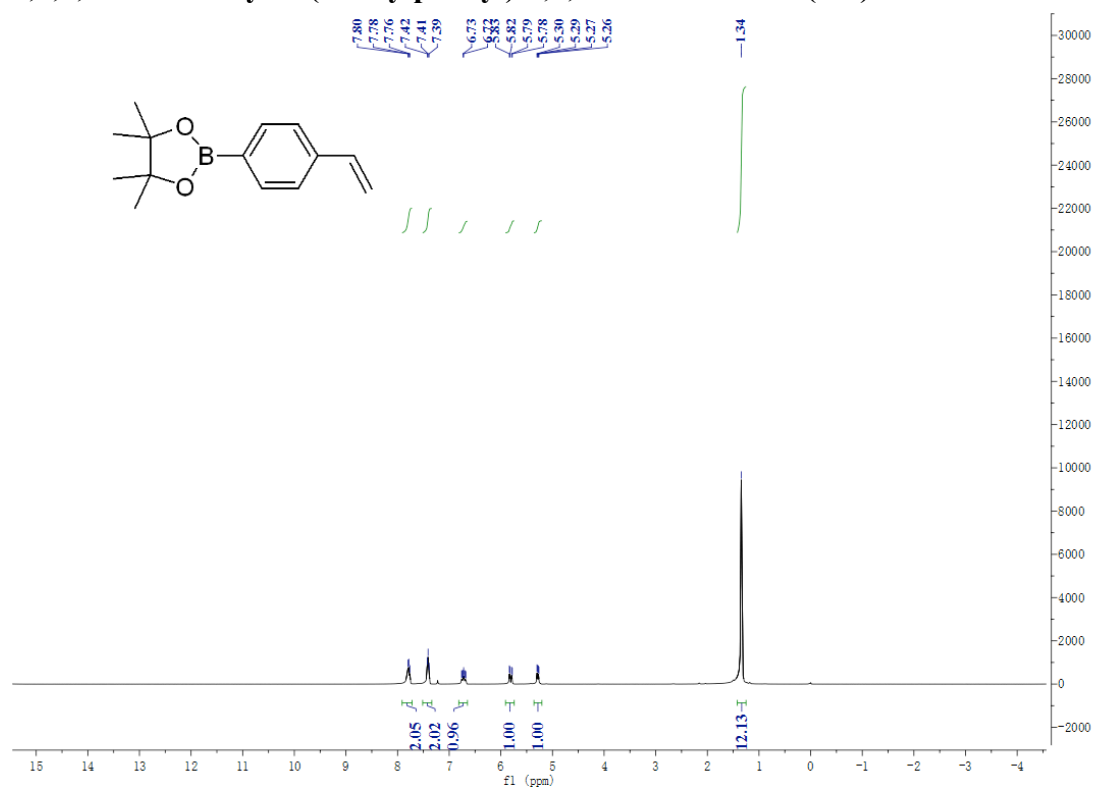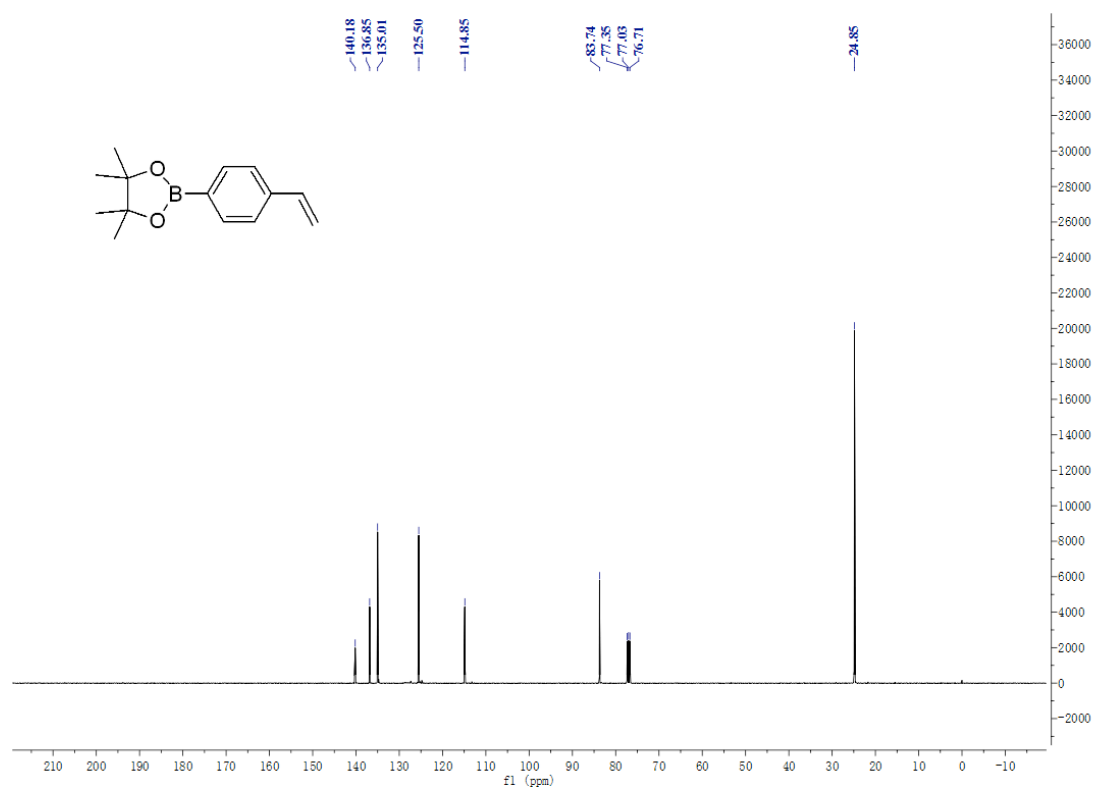

Chemical structure of 10-(3-allyloxyphenyl)-10,11,12,13-tetrahydronaphthalen-2-one is shown. The  $^1\text{H}$  NMR spectrum (400 MHz,  $\text{CDCl}_3$ ) displays peaks in the aromatic region (6.7-7.9 ppm) and the aliphatic region (1.5-2.4 ppm). Integration values are provided for several regions: 7.99, 7.97, 7.46, 7.44, 6.73, 5.87, 5.83, 5.73, 5.38, 5.35, 5.38, 5.35, 2.41, 2.40, 2.39, 2.37, 2.35, 2.33, 2.31, 2.03, 2.00, 1.88, 1.85, 1.72, 1.70, 1.69, 1.66, 1.64, 1.56, 1.55, 1.43, 1.41, 1.26, 1.24, 1.19, 1.14, 0.97. Integration values for the aliphatic region are 2.02, 1.98, 1.00, 1.00, 1.01, 1.00, 1.00, 1.00, 5.06, 1.22, 2.23, 5.07, 2.35, 7.08, 3.29.

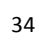

**(*E*)-(2-cyclohexylvinyl) benzene (1)**

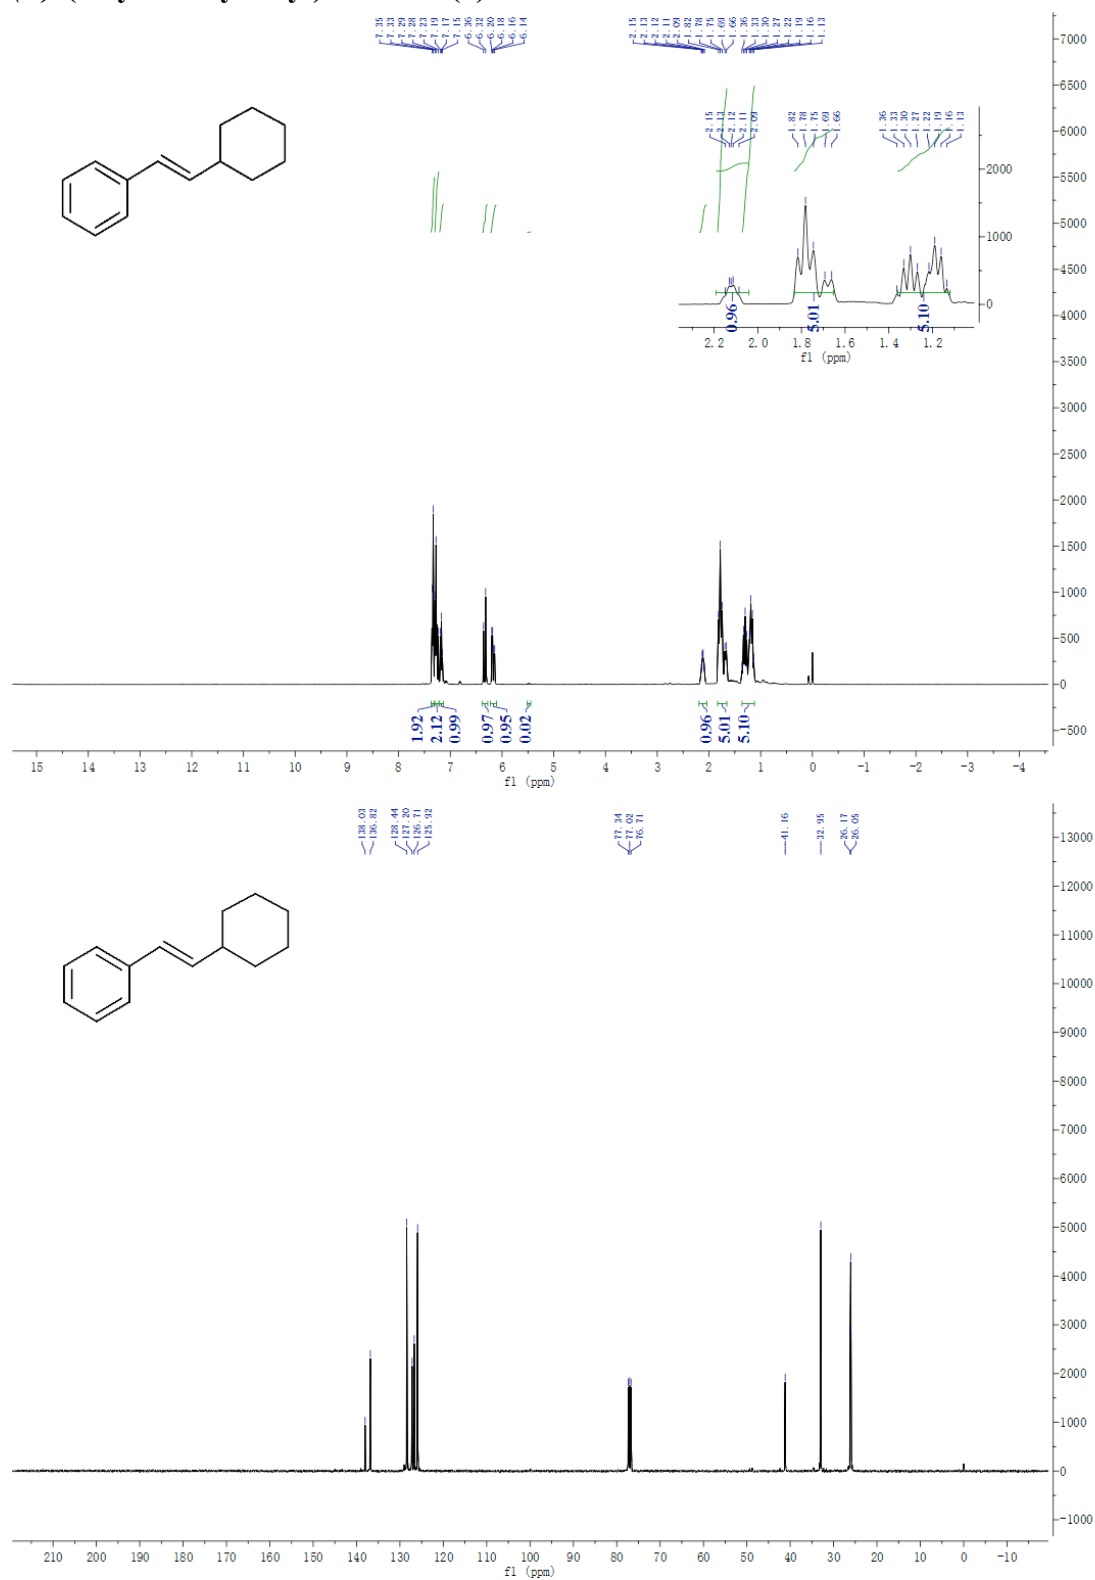

Chemical structure: C1=CC=C(C=C1)/C=C/C#CC2=CC=CC=C2

<sup>1</sup>H NMR spectrum (ppm):

- Aromatic region (7.2-7.7 ppm): Multiplet, integration 2.17, 1.89, 3.89, 1.07.
- Alkene region (6.2-6.4 ppm): Multiplet, integration 0.92, 0.90, 0.02.
- Aliphatic region (1.5-2.3 ppm): Multiplet, integration 1.00, 5.00, 5.16.

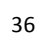

**(*E*)-1-(tert-butyl)-4-(2-cyclohexylvinyl)benzene (3)**

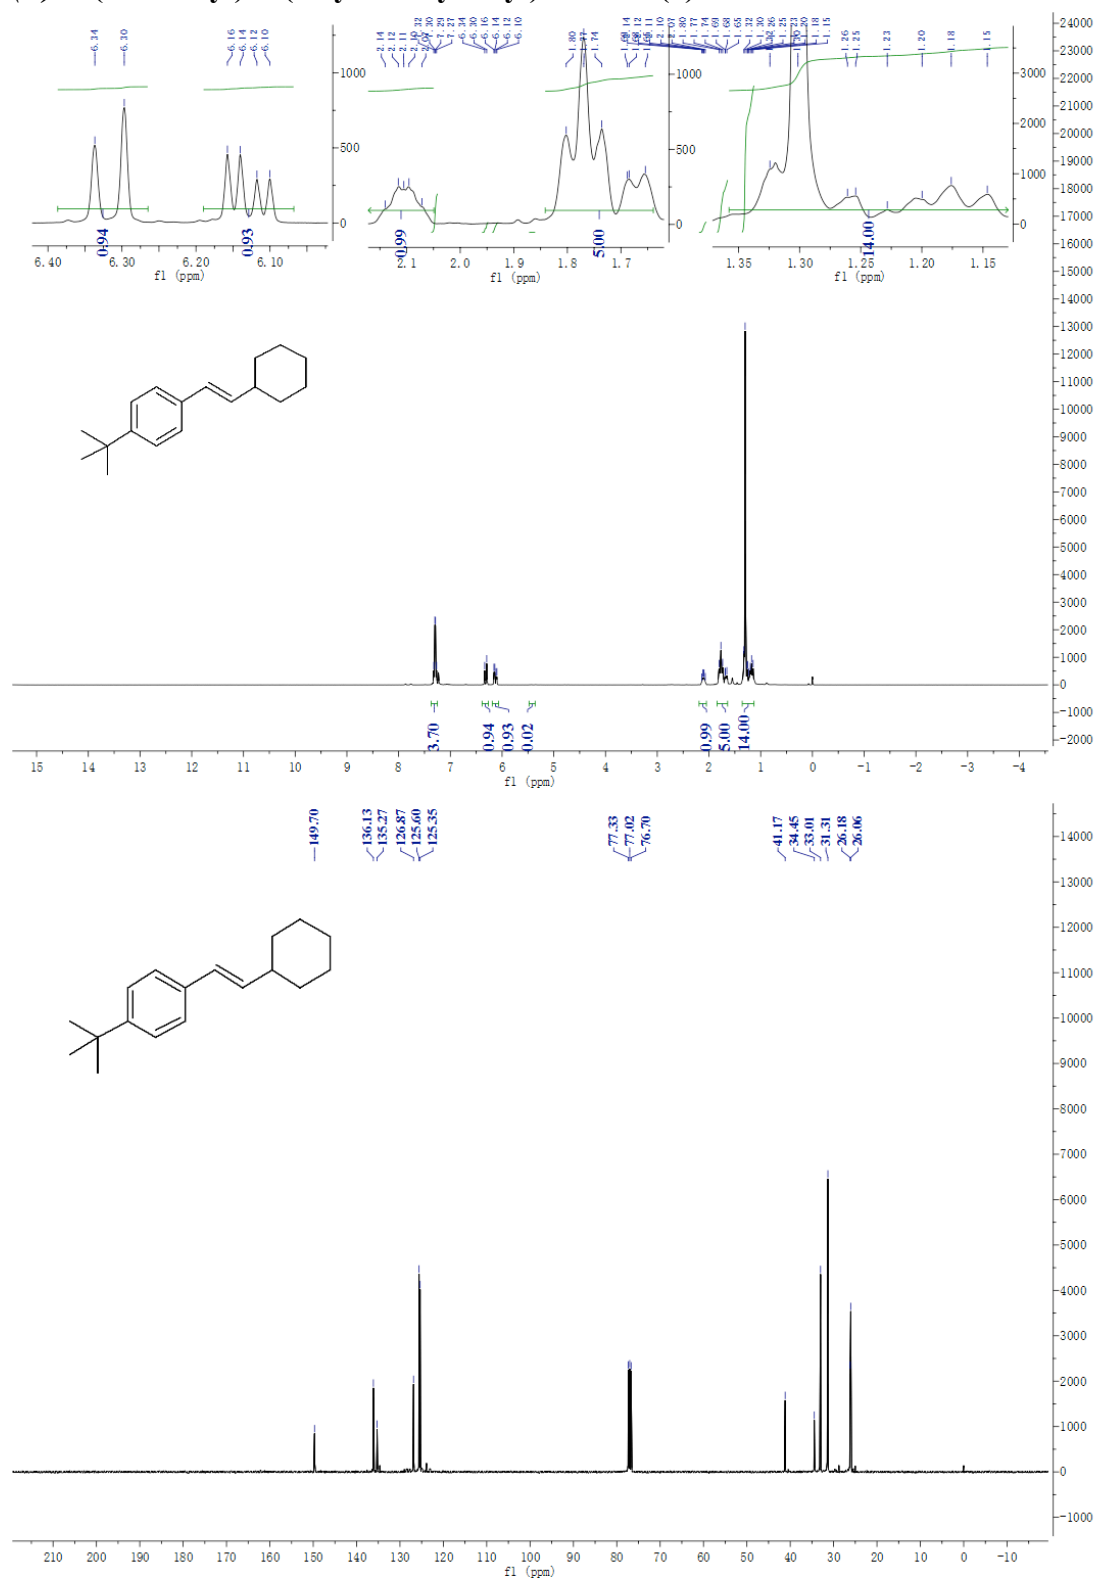

**(E)-1-bromo-4-(2-cyclohexylvinyl)benzene (4)**

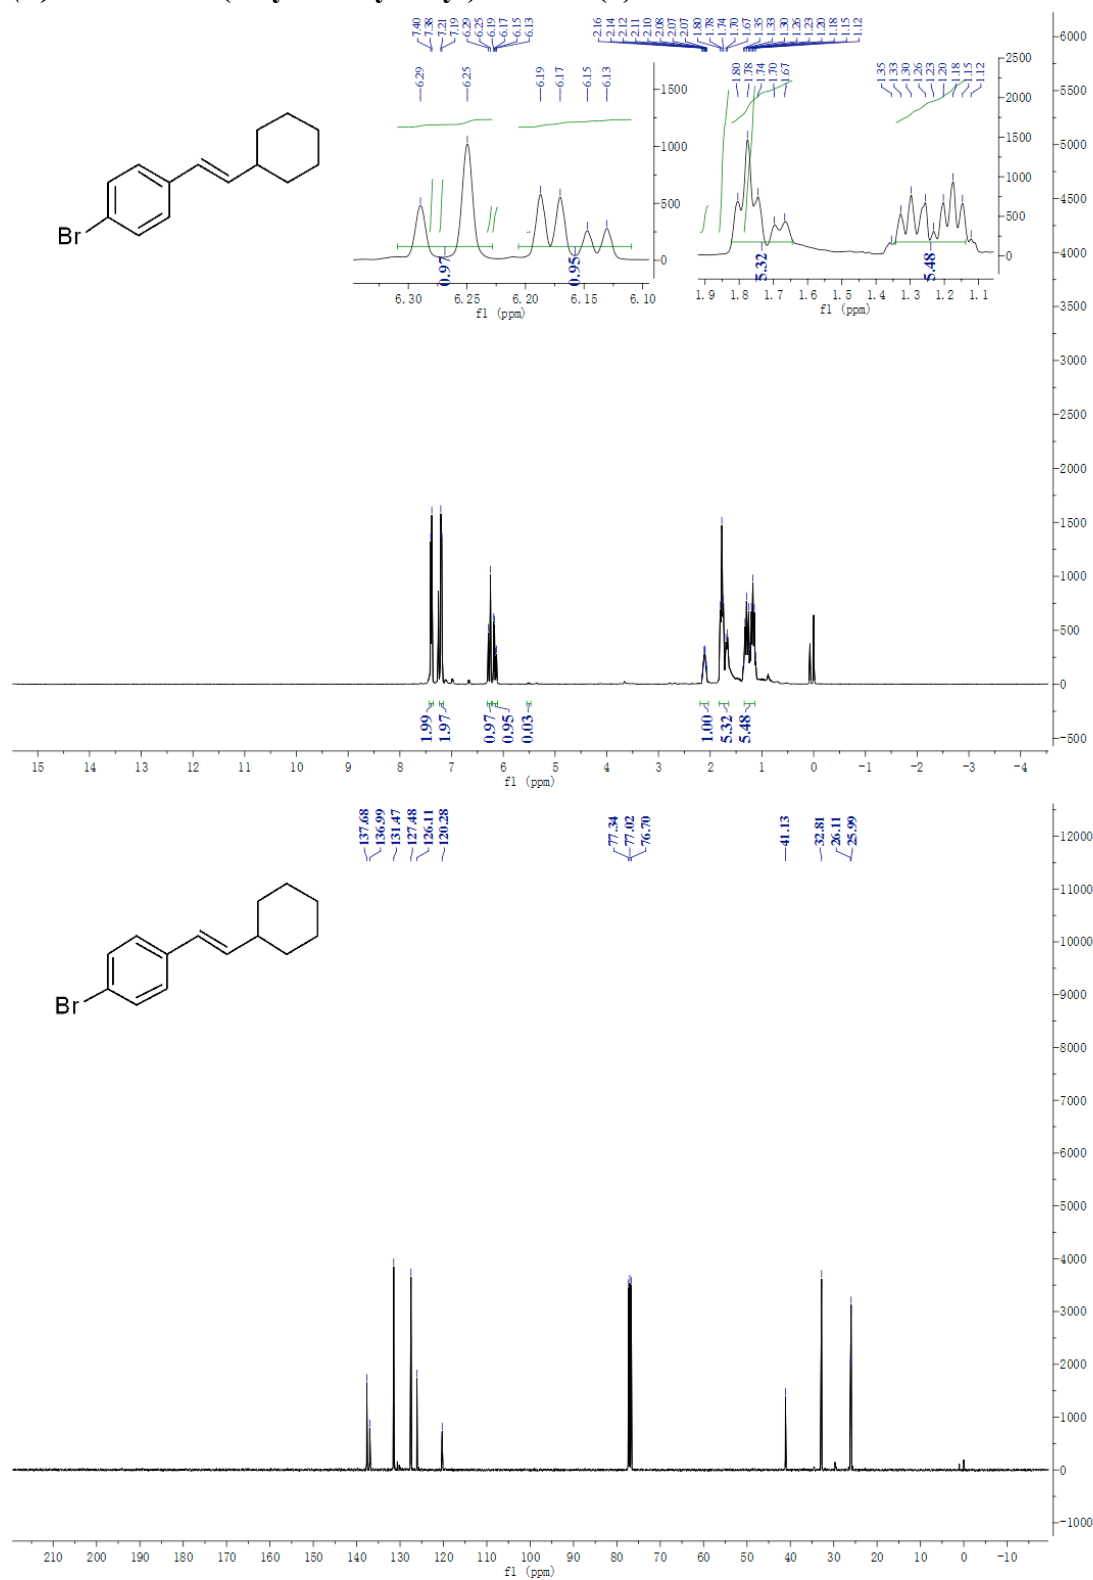

**(E)-1-chloro-4-(2-cyclohexylvinyl)benzene (5)**

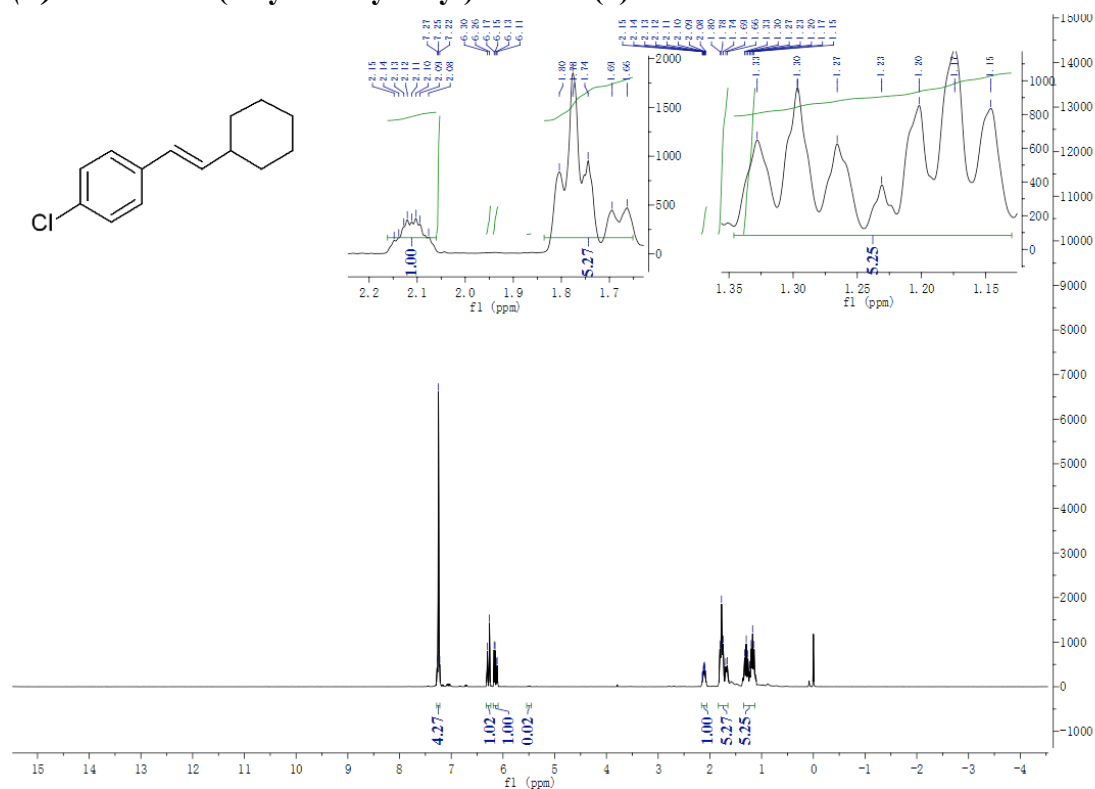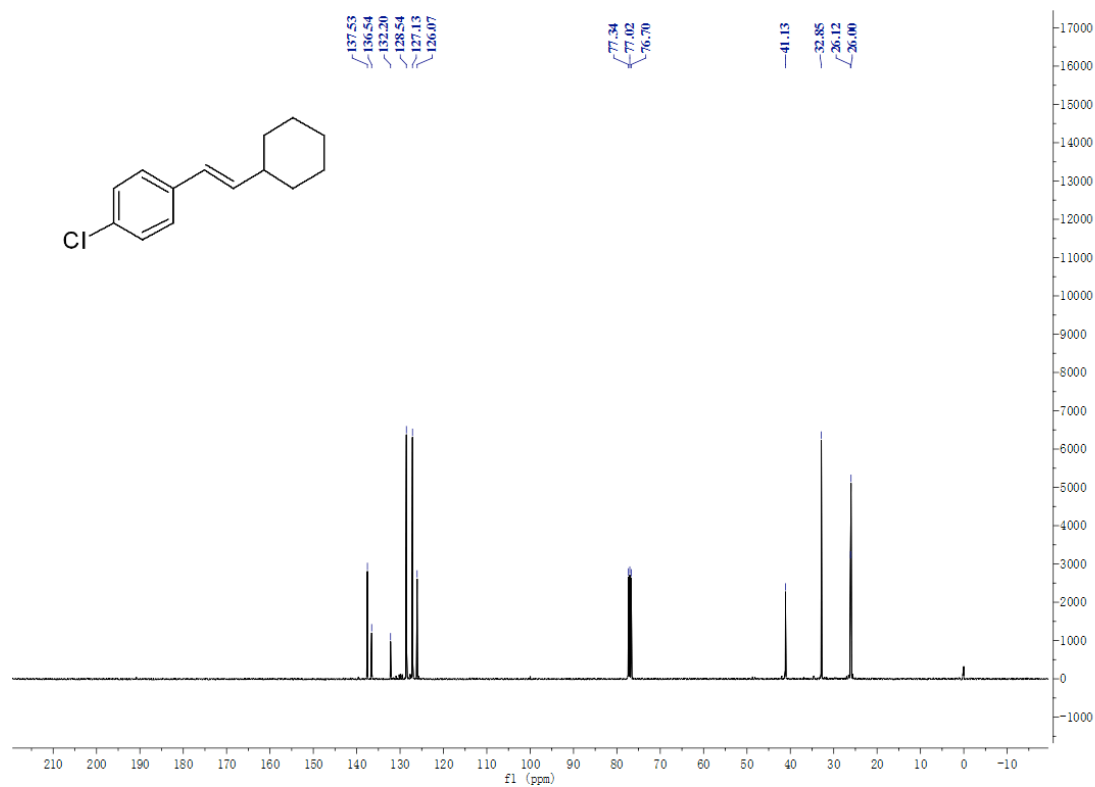

**(E)-1-(2-cyclohexylvinyl)-4-fluorobenzene (6)**

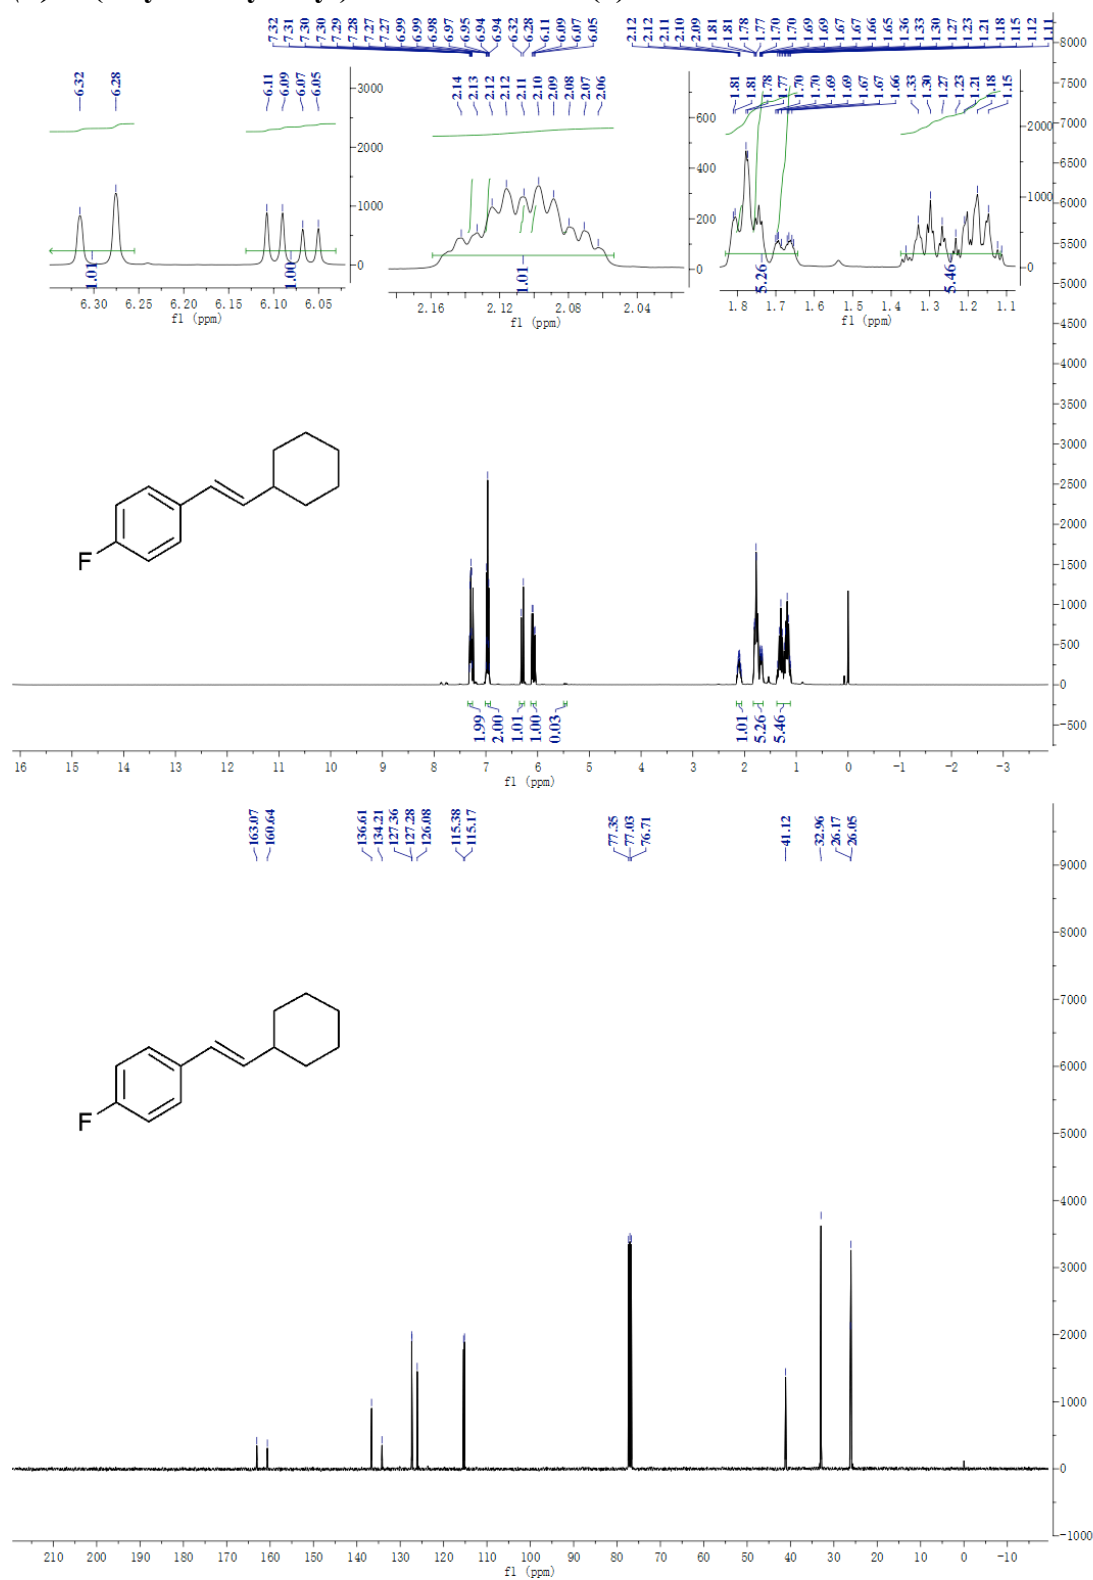



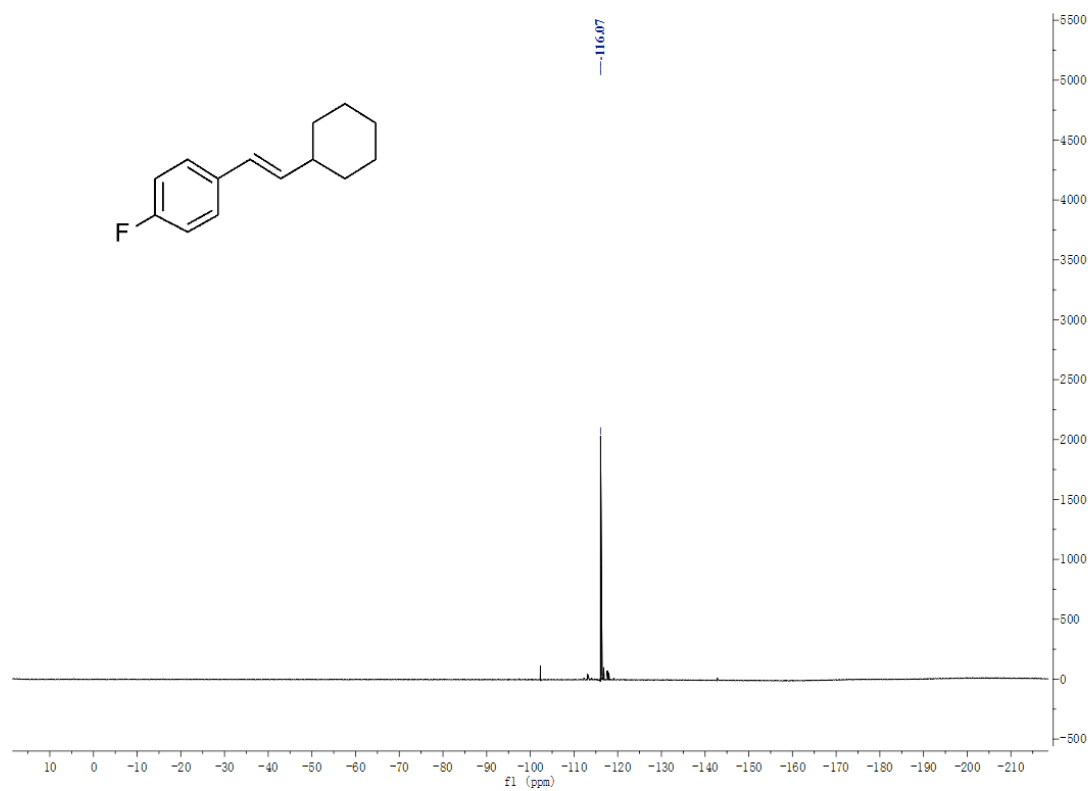

**(E)-4-(2-cyclohexylvinyl)-N, N-diphenylaniline (7)**

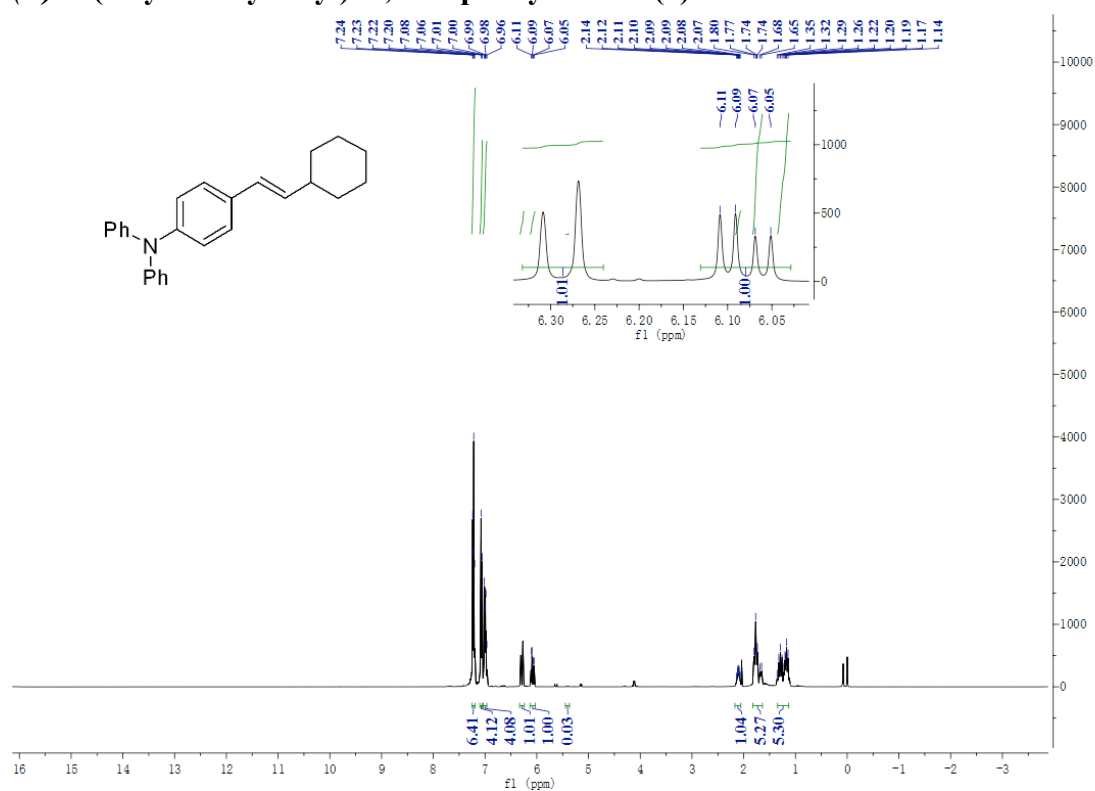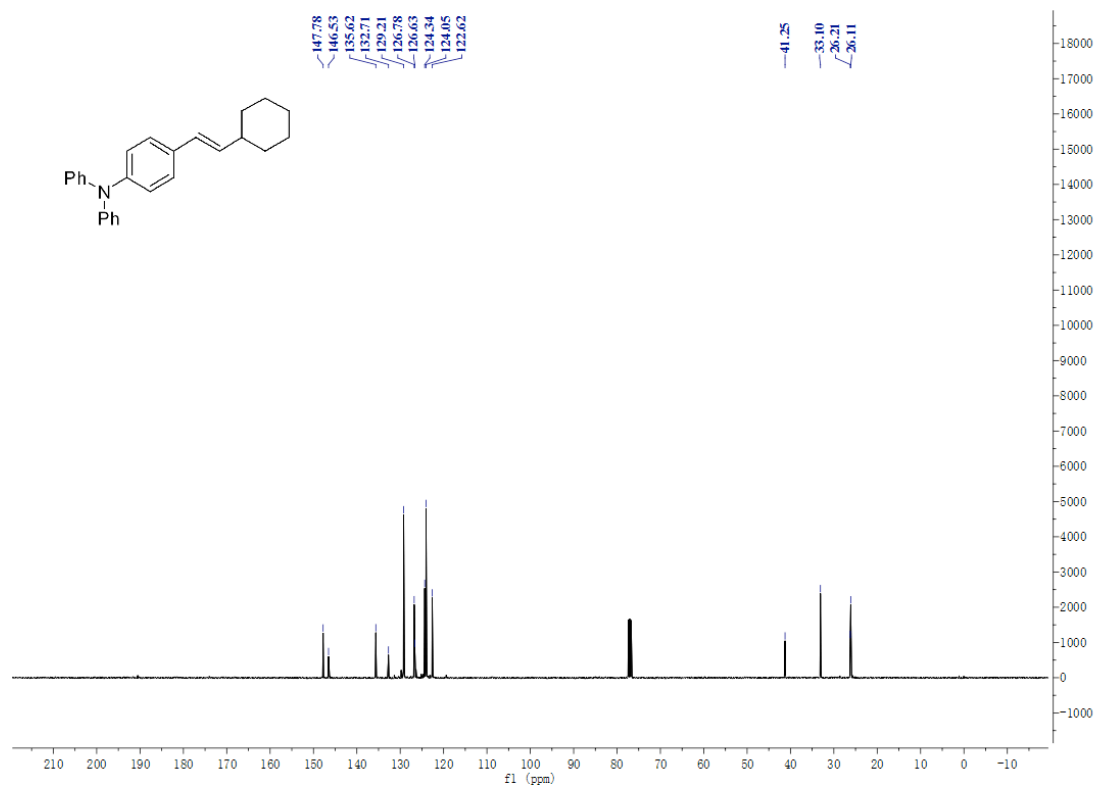

**(E)-2-(4-(2-cyclohexylvinyl)phenyl)-4,4,5,5-tetramethyl-1,3,2-dioxaborolane(8)**

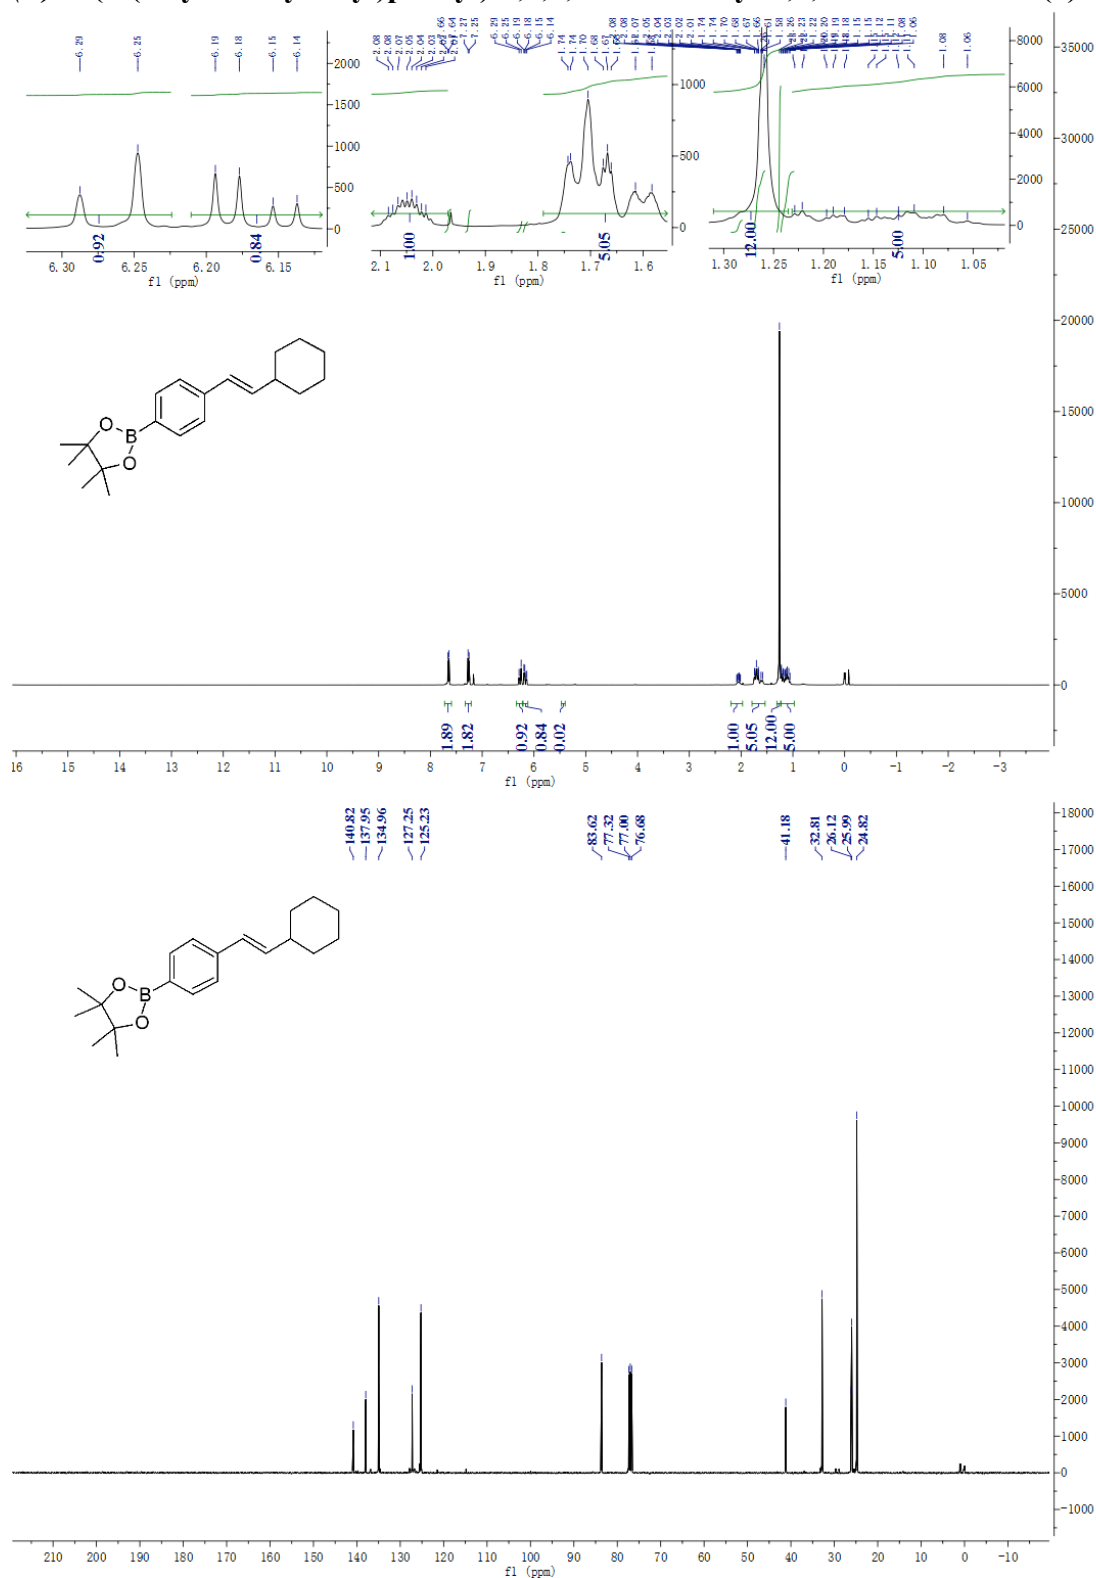

**(E)-1-chloro-3-(2-cyclohexylvinyl) benzene (9)**

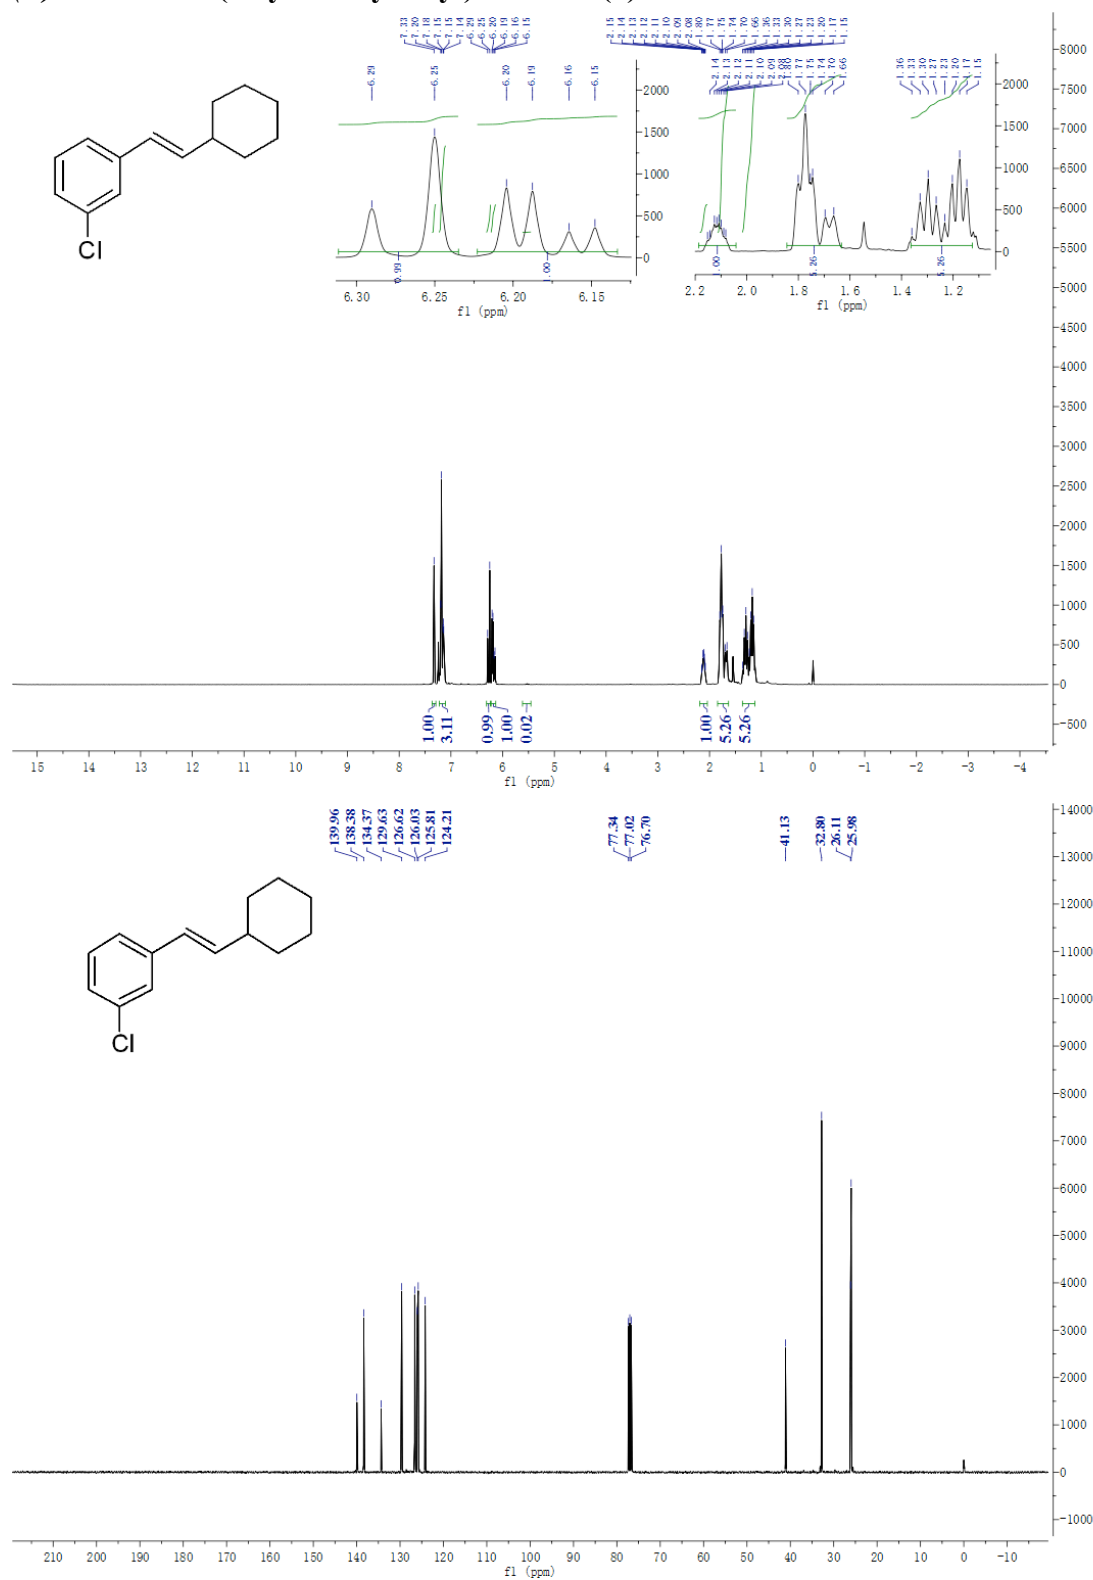

**(E)-2-(2-cyclohexylvinyl)naphthalene(10)**

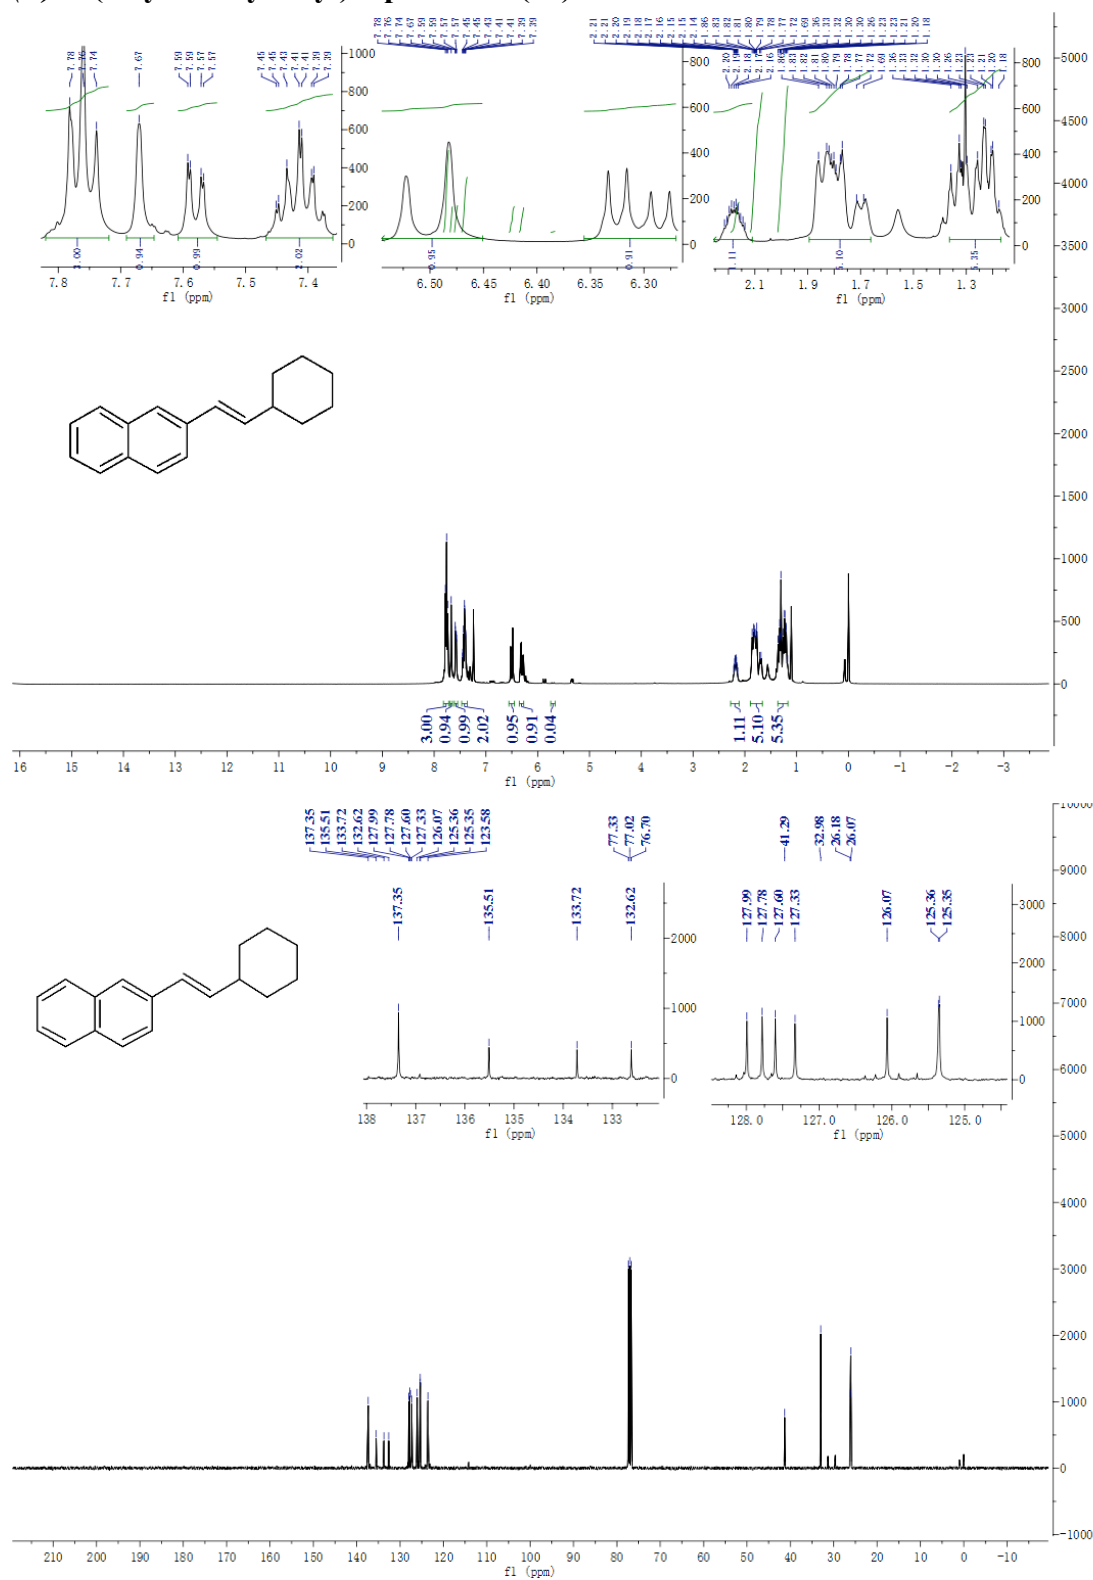

**(E)-5-(2-cyclohexylvinyl)-2,2-difluorobenzo[d][1,3]dioxole (11)**

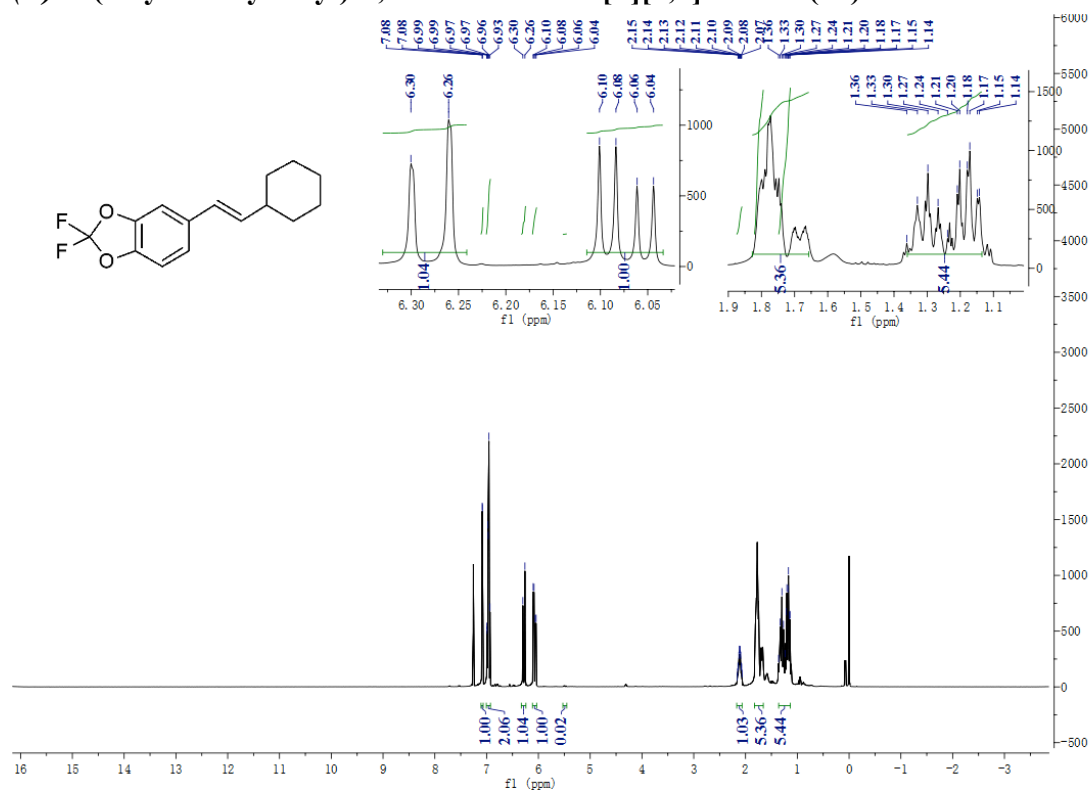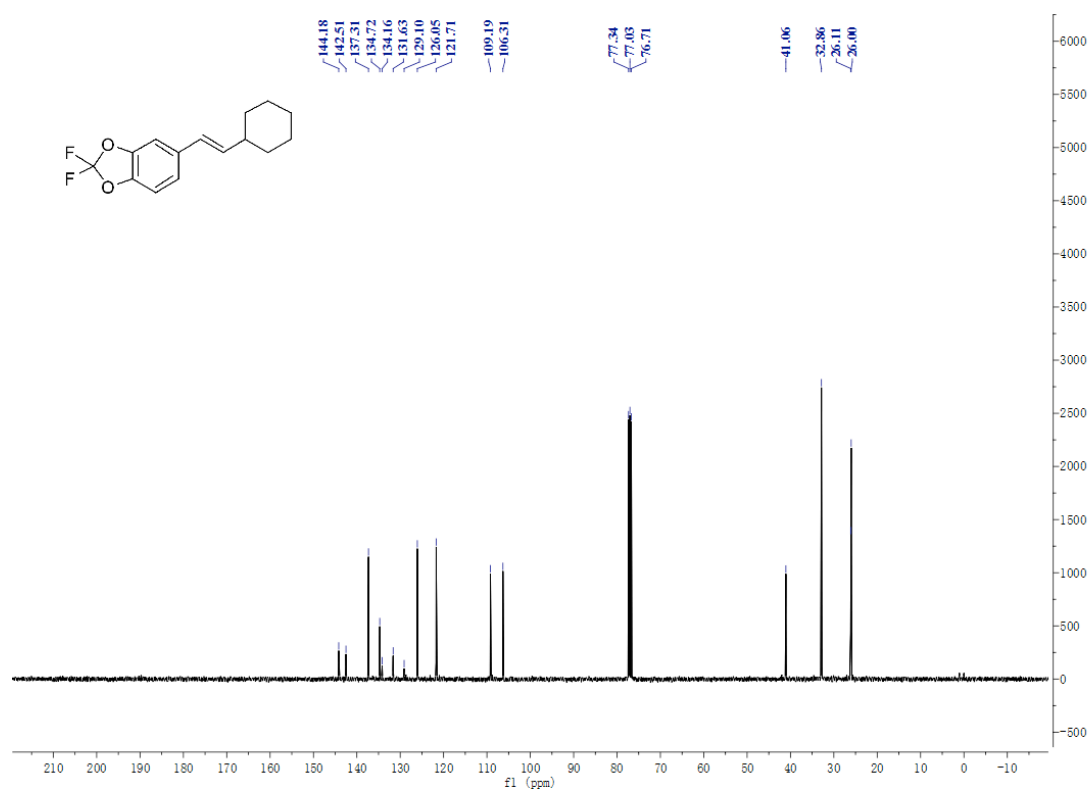

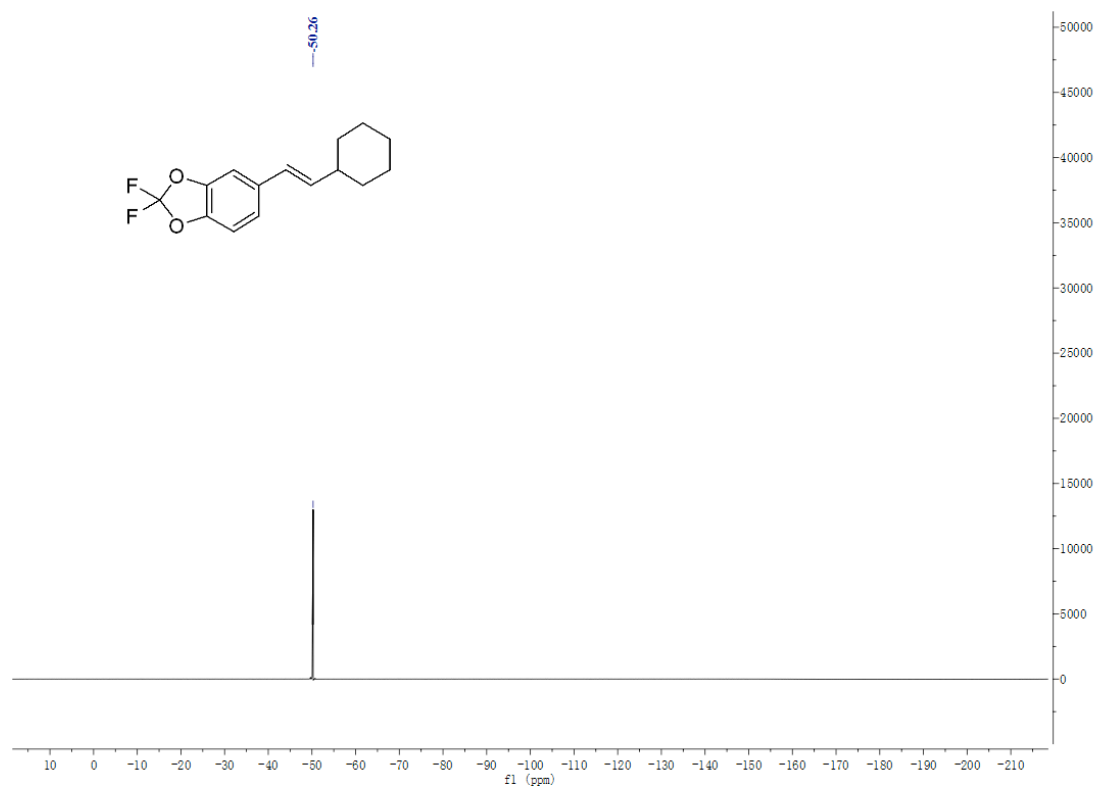

**(E)-1-(2-cyclohexylvinyl)-2,3,4,5,6-pentafluorobenzene (12)**

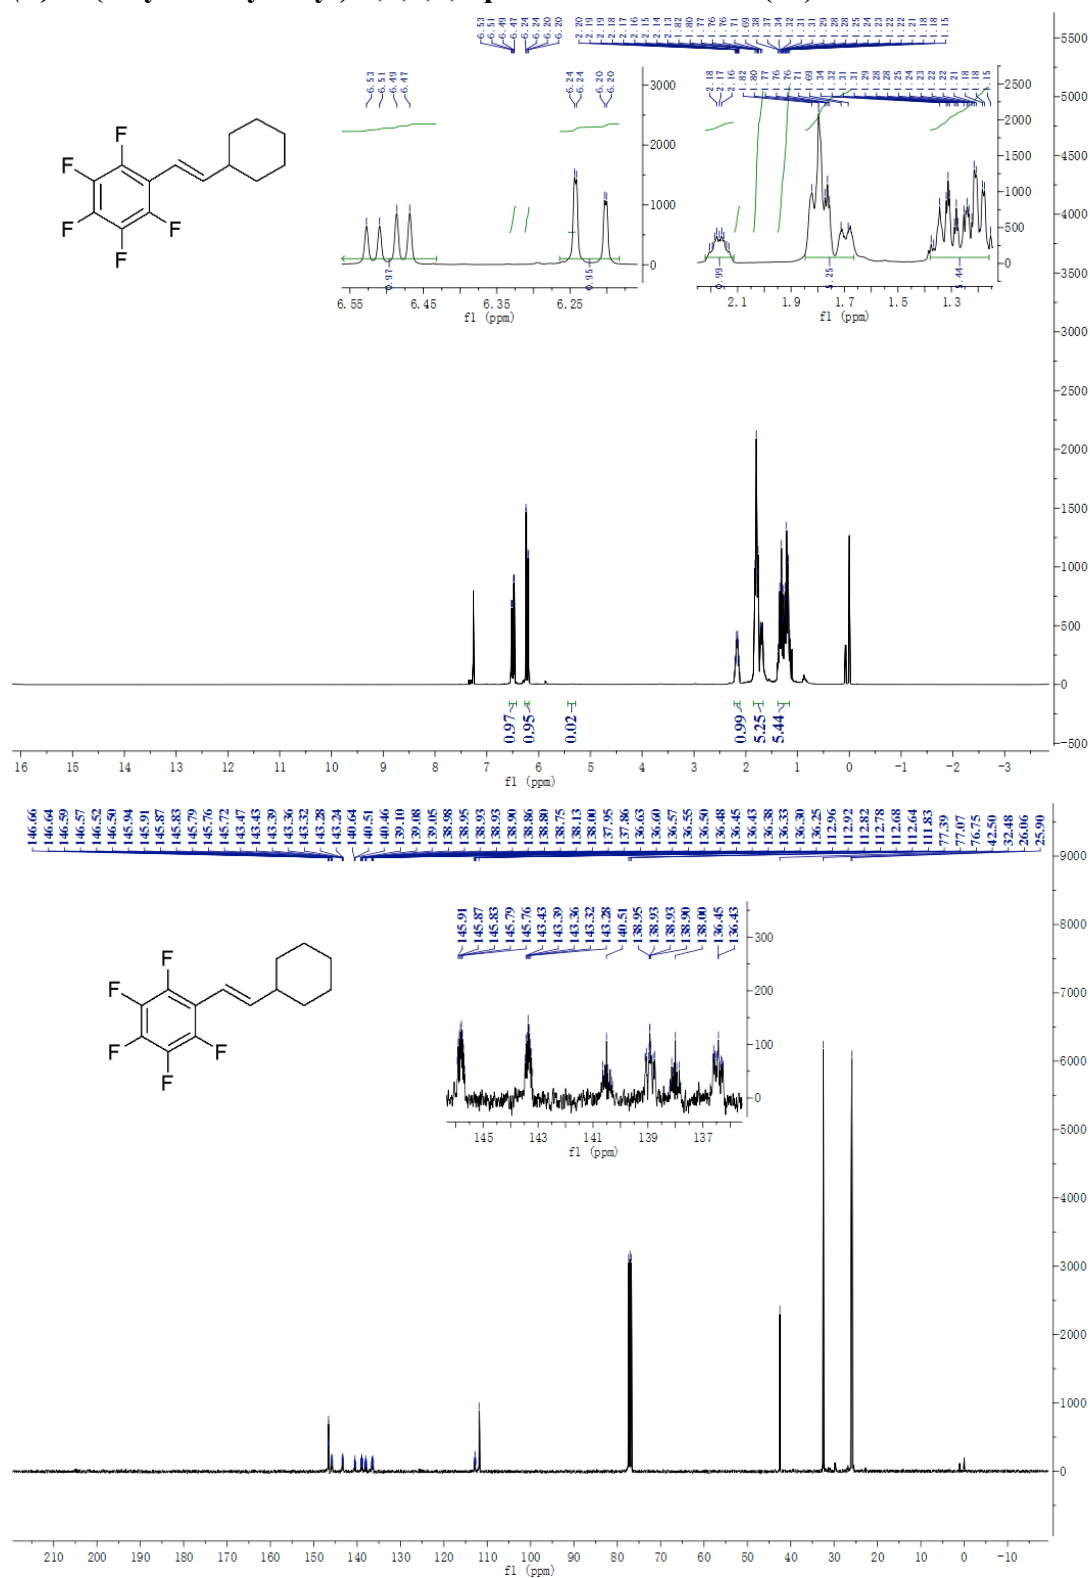



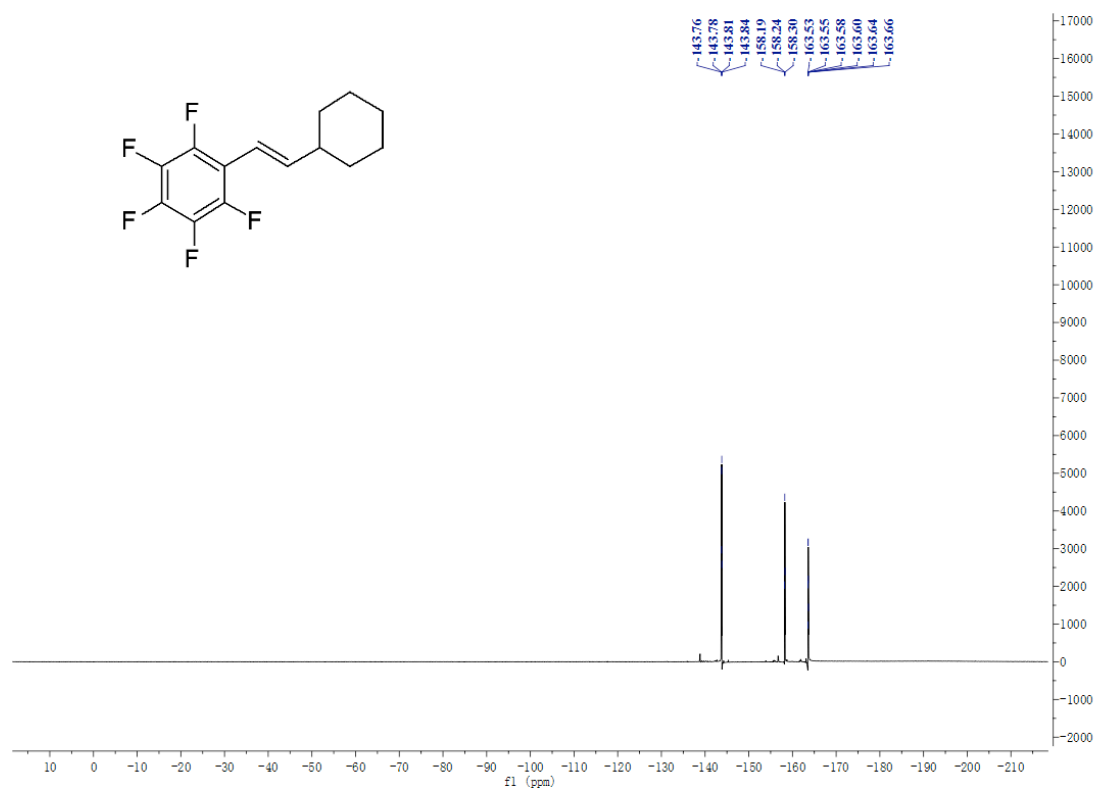

**(E)-2-(4-(2-cyclohexylvinyl)phenyl)thiophene (13)**

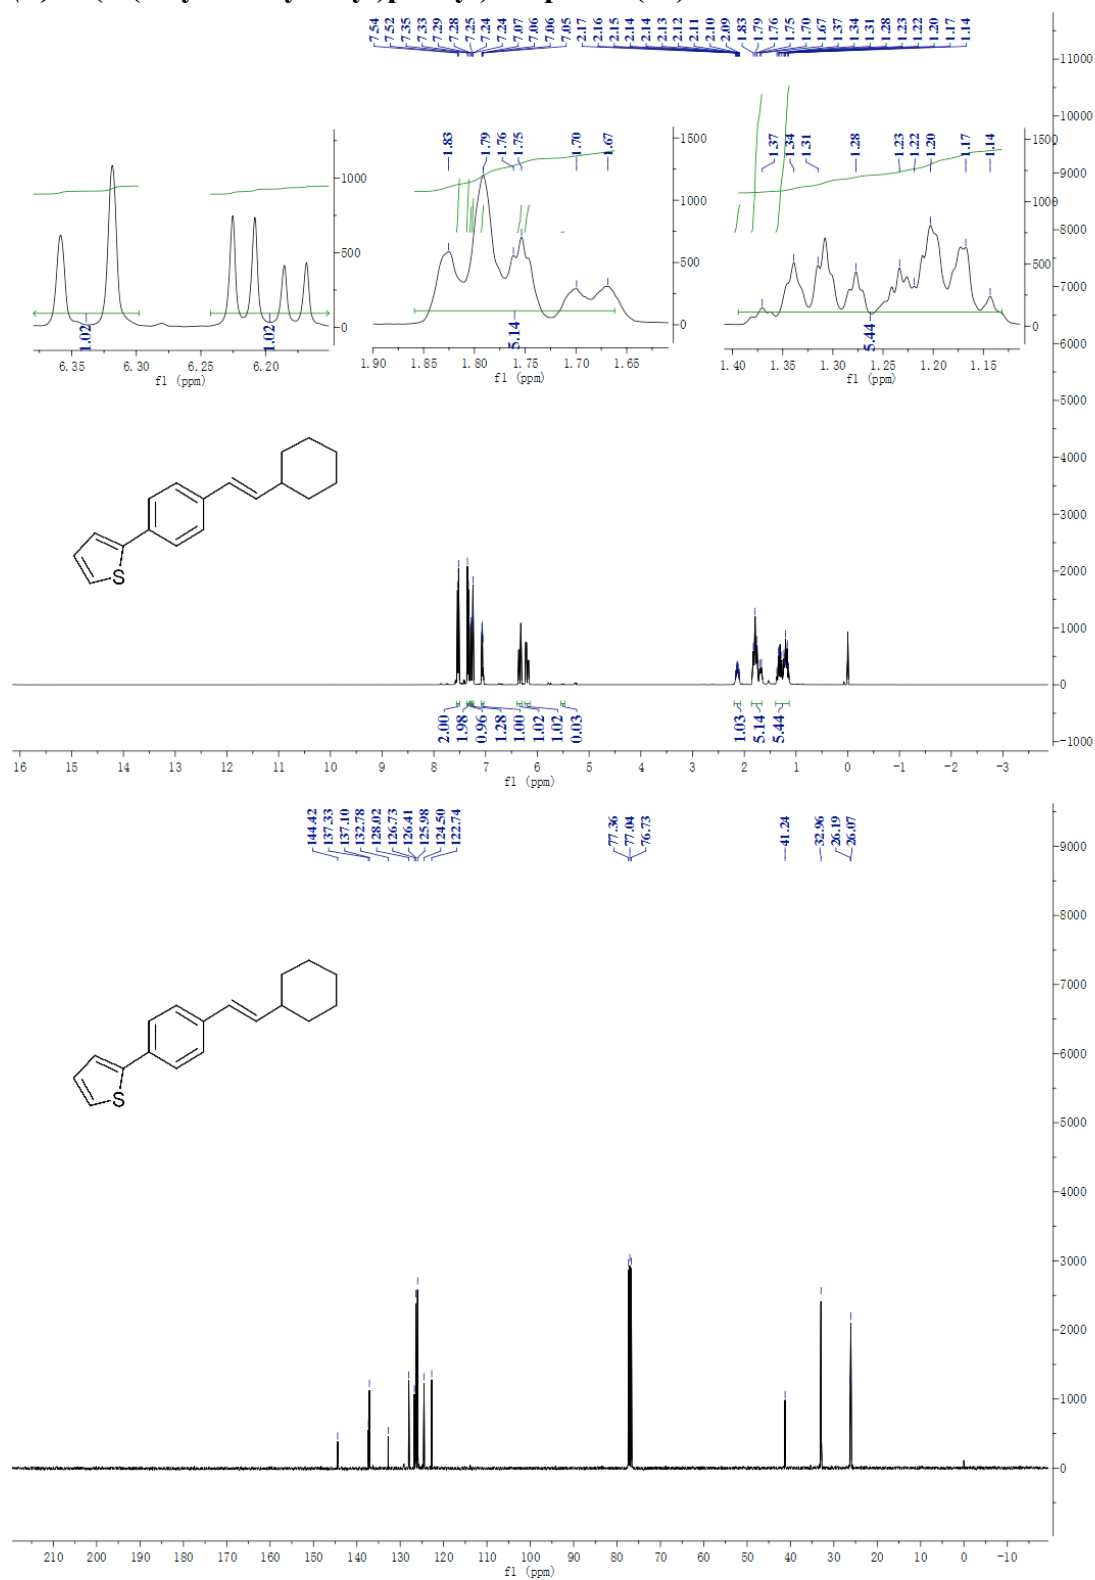

**(E)-2-(2-cyclohexylvinyl)pyridine (14)**

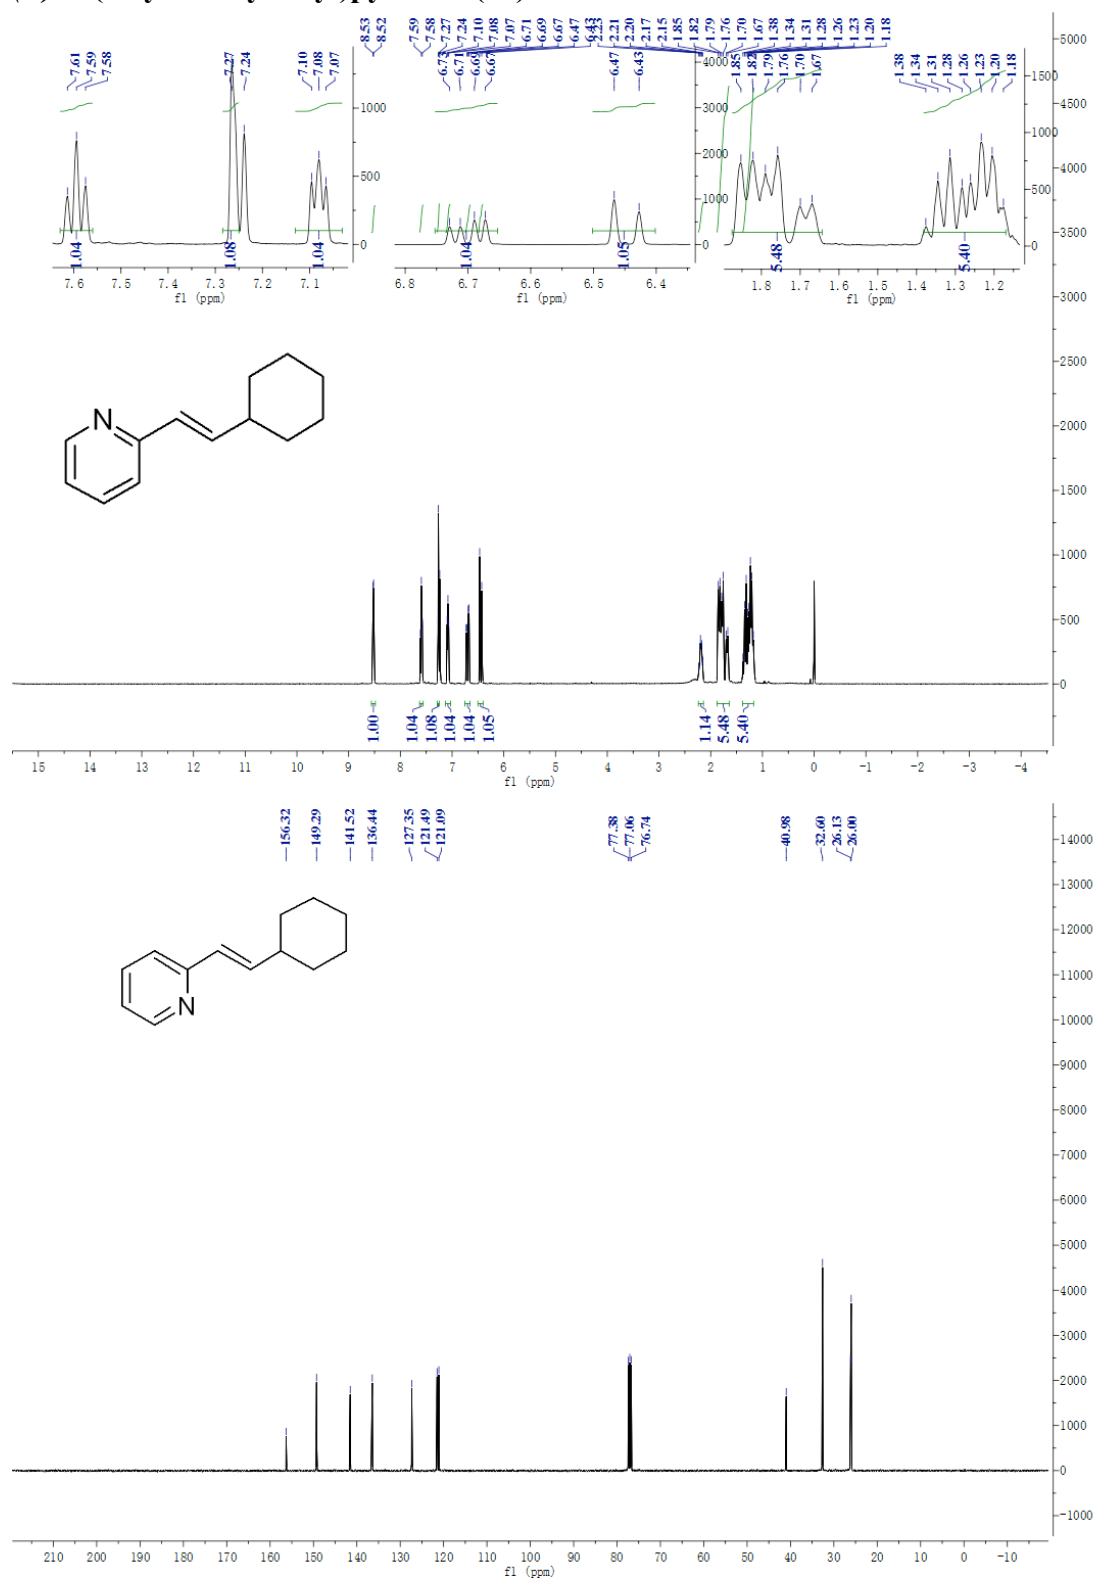

# 4-(2,2-diphenylvinyl)tetrahydro-2H-pyran (15)

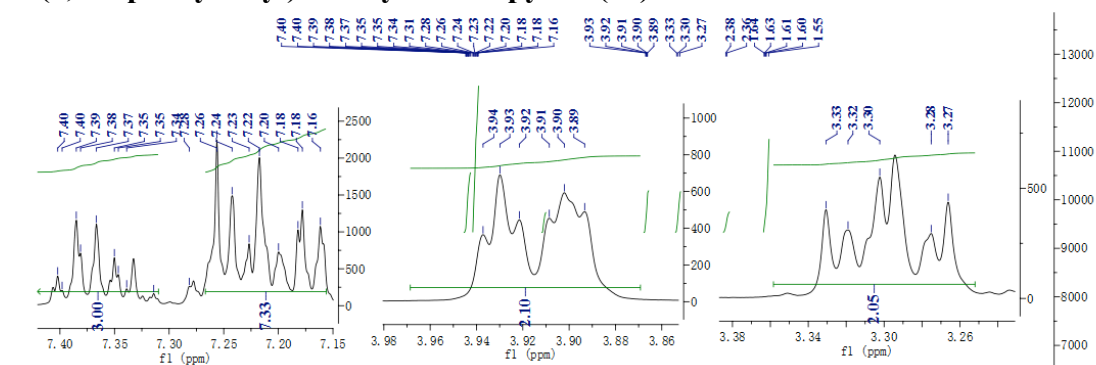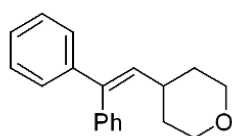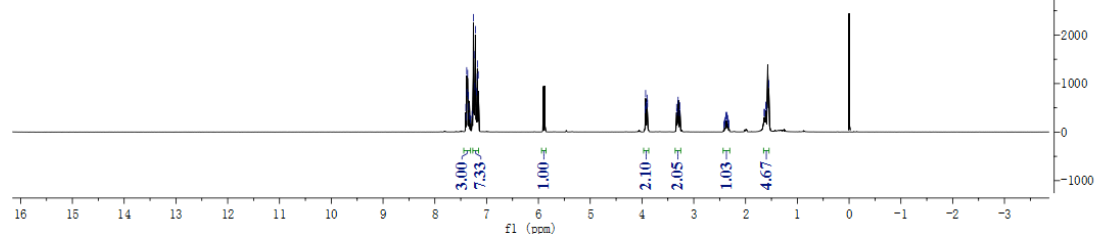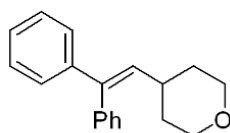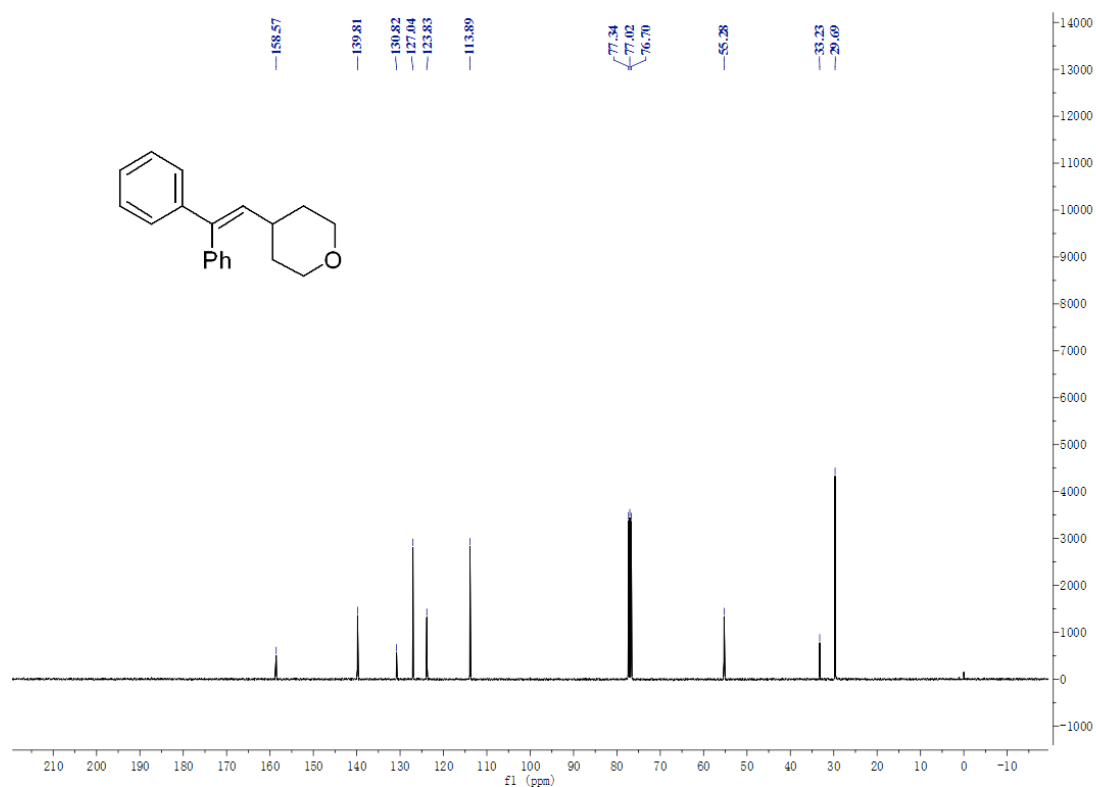

**(8R, 9S, 10R, 13S, 14S, 17S)-10, 13-dimethyl-3-oxo-2, 3, 6,7,8,9,10,11,12,13,14,15, 16, 17-tetradecahydro-1H-cyclopenta[a]phenanthren-17-yl 4-((E)-2-cyclohexyl vinyl) benzoate (16)**

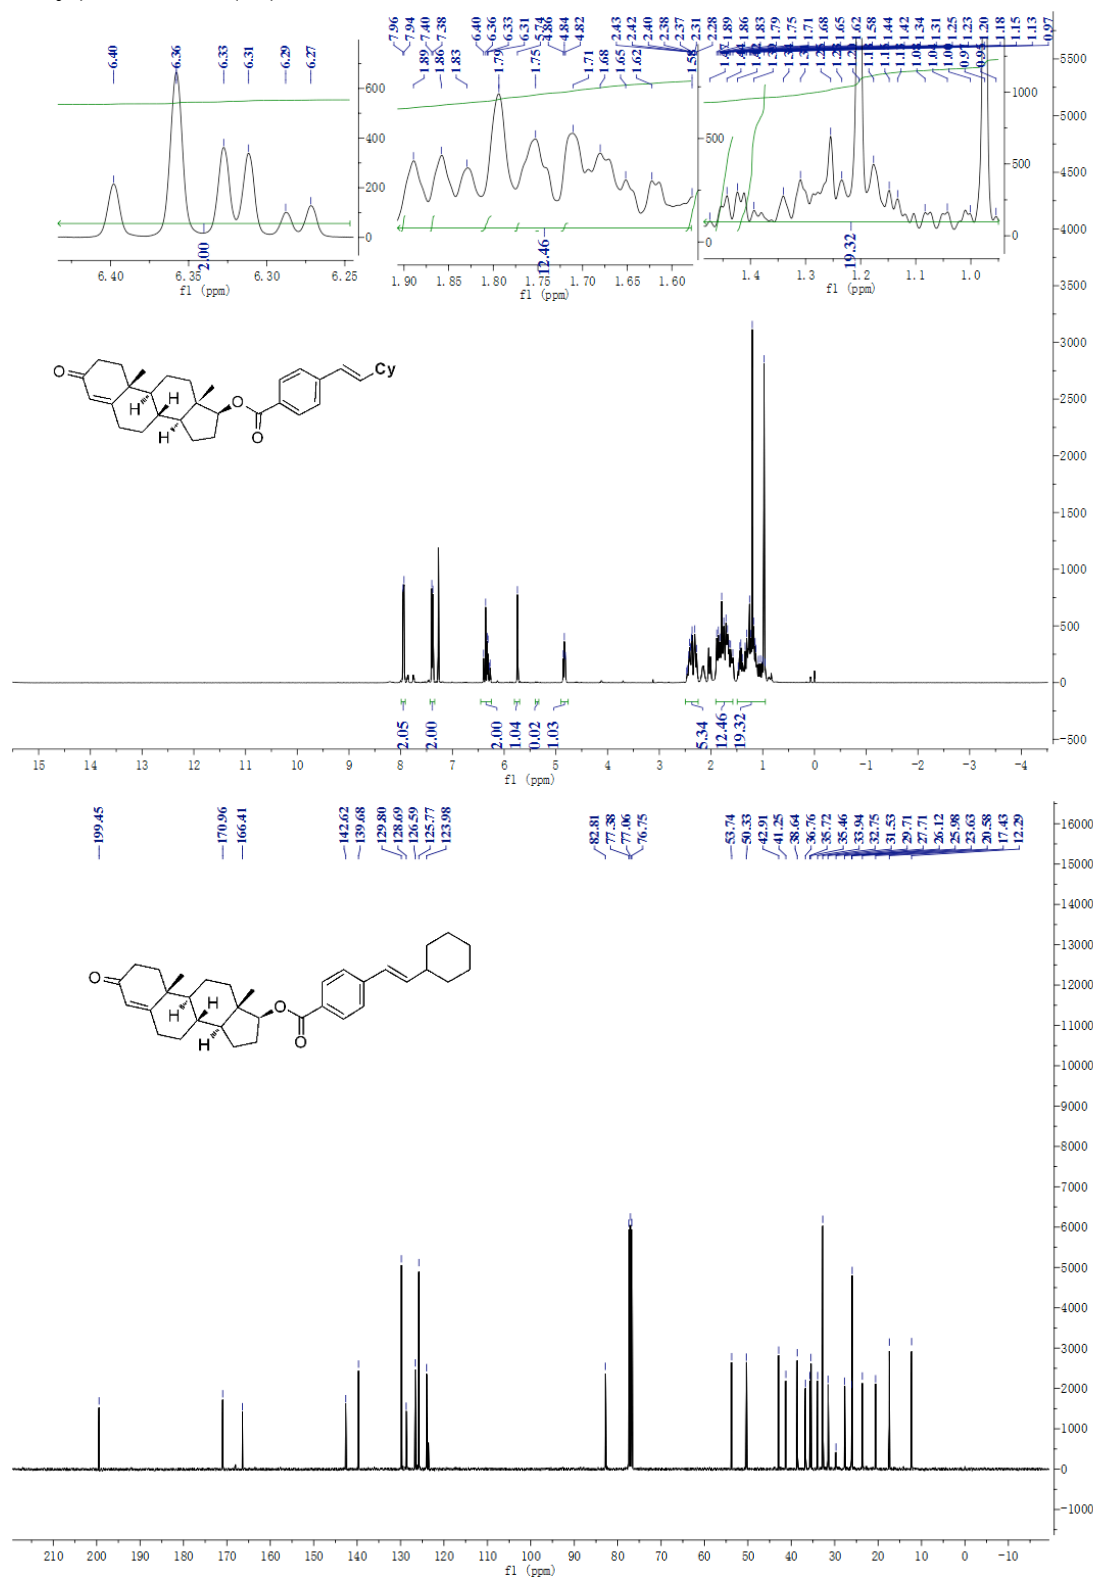

**(E)-4-(3,3-dimethylbut-1-en-1-yl)-1,1'-biphenyl (17)**

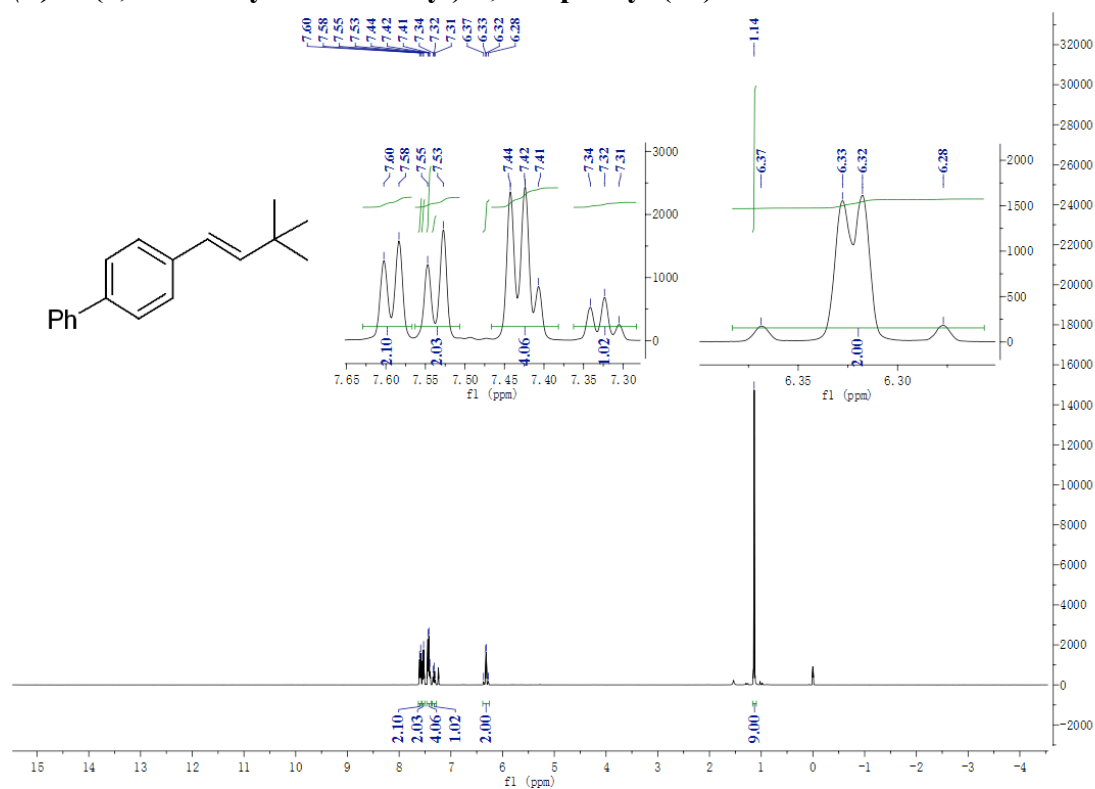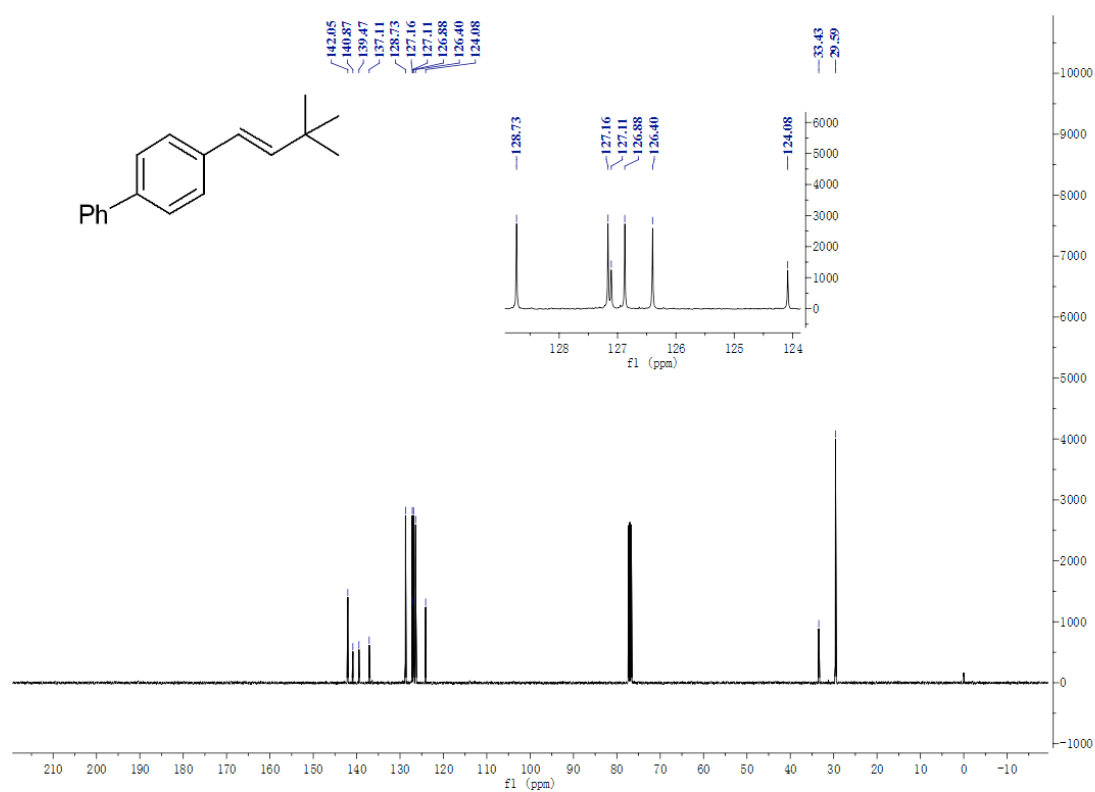

**(E)-tert-butyl 4-methyl-4-styrylpiperidine-1-carboxylate (18)**

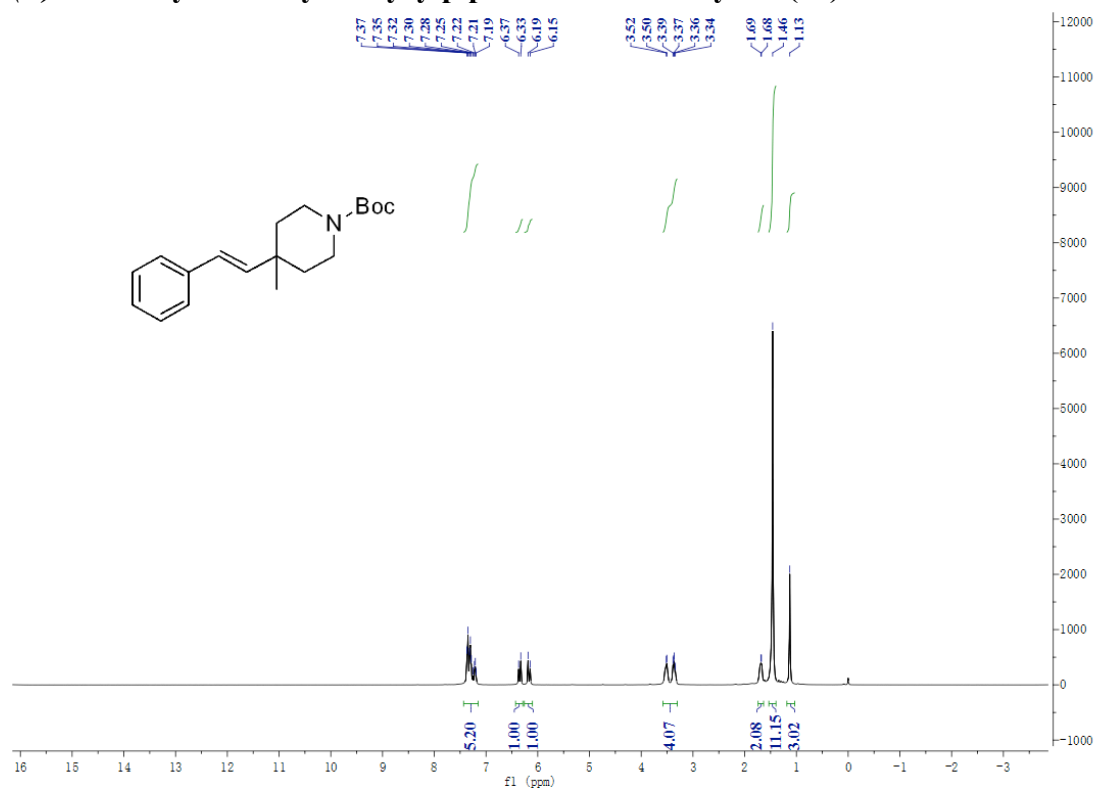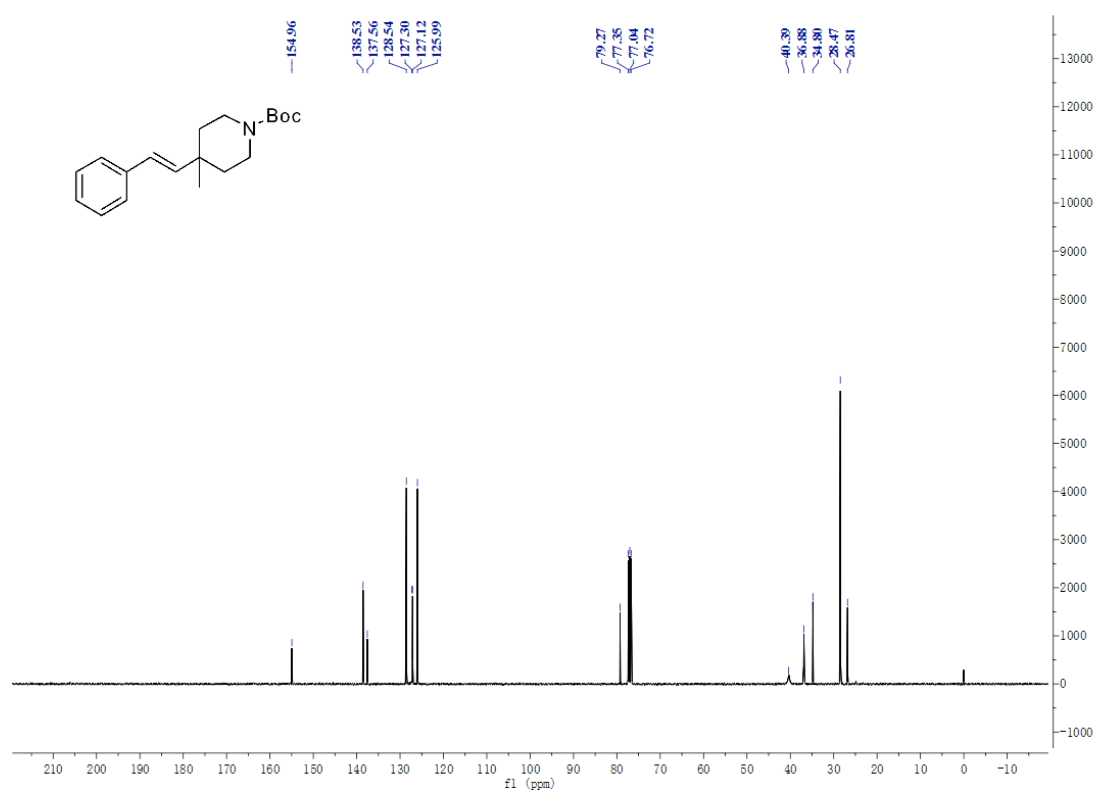

**(*E*)-2-(4-(3,3-dimethylbut-1-en-1-yl)phenyl)-4,4,5,5-tetramethyl-1,3,2-dioxaborolane (19)**

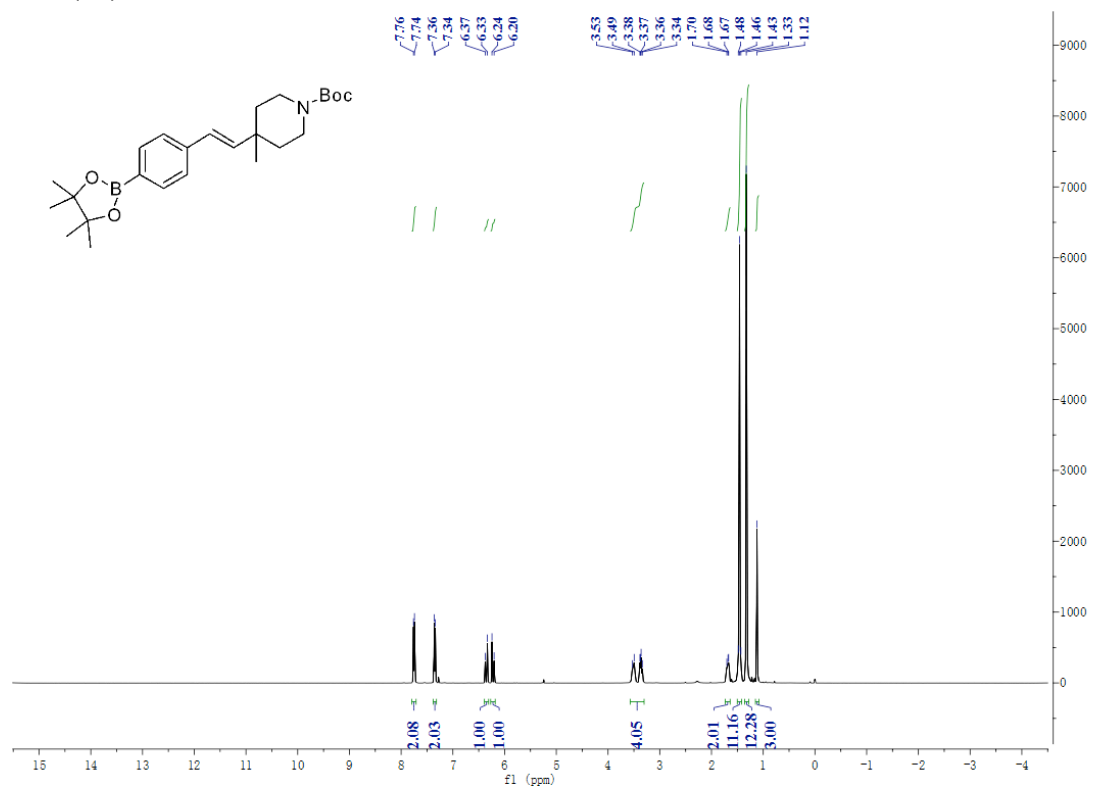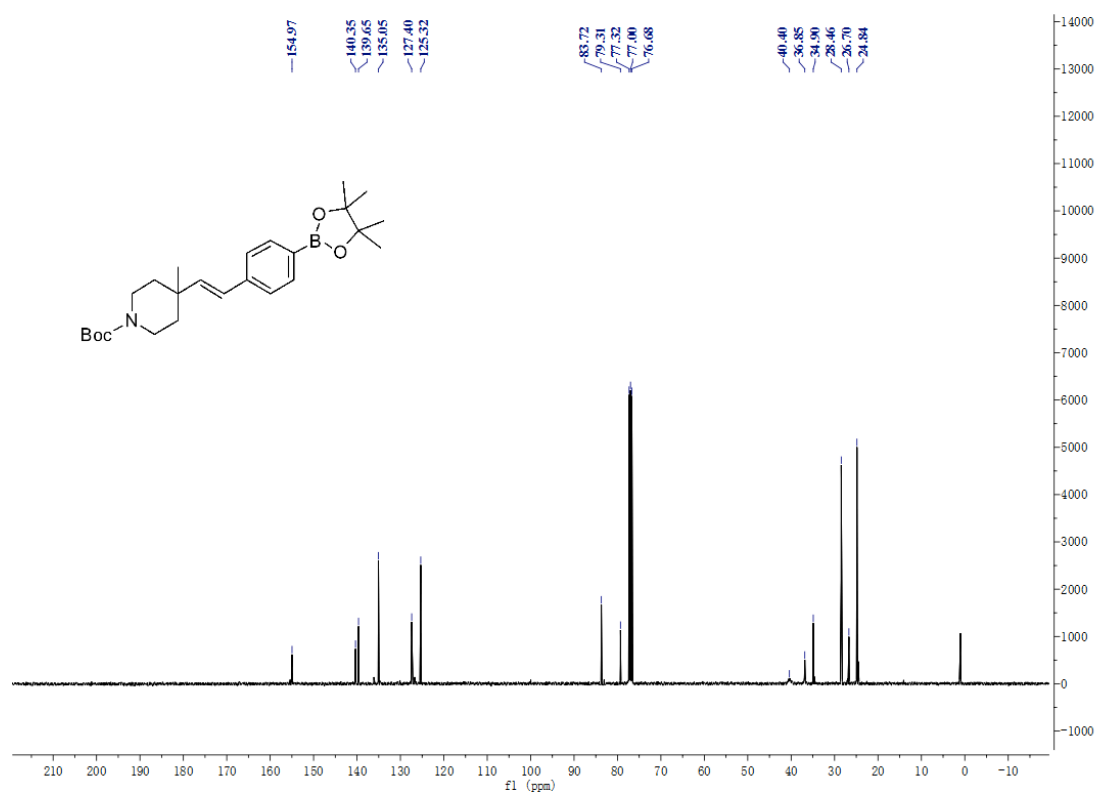



**(3r,5r,7r)-1-((*E*)-styryl)adamantane (20)**

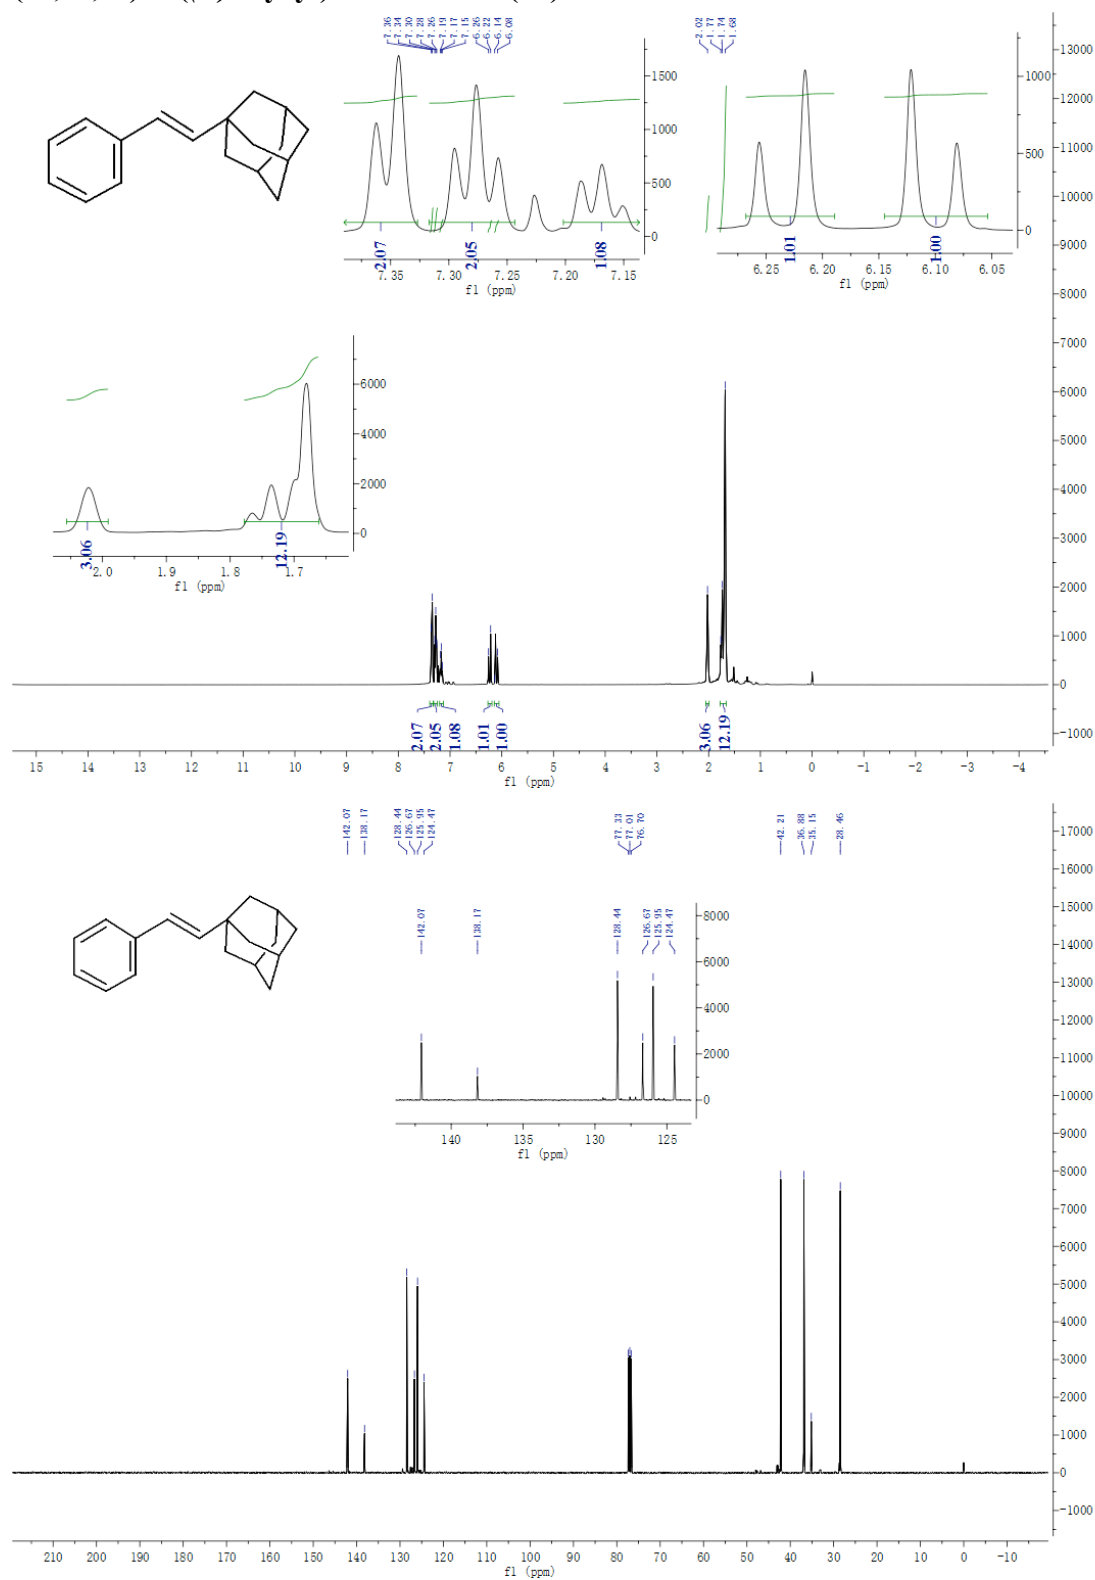

**(E)-2-((4,4-dimethyl-6-phenylhex-5-en-1-yl)oxy)-1,4-dimethylbenzene (21)**

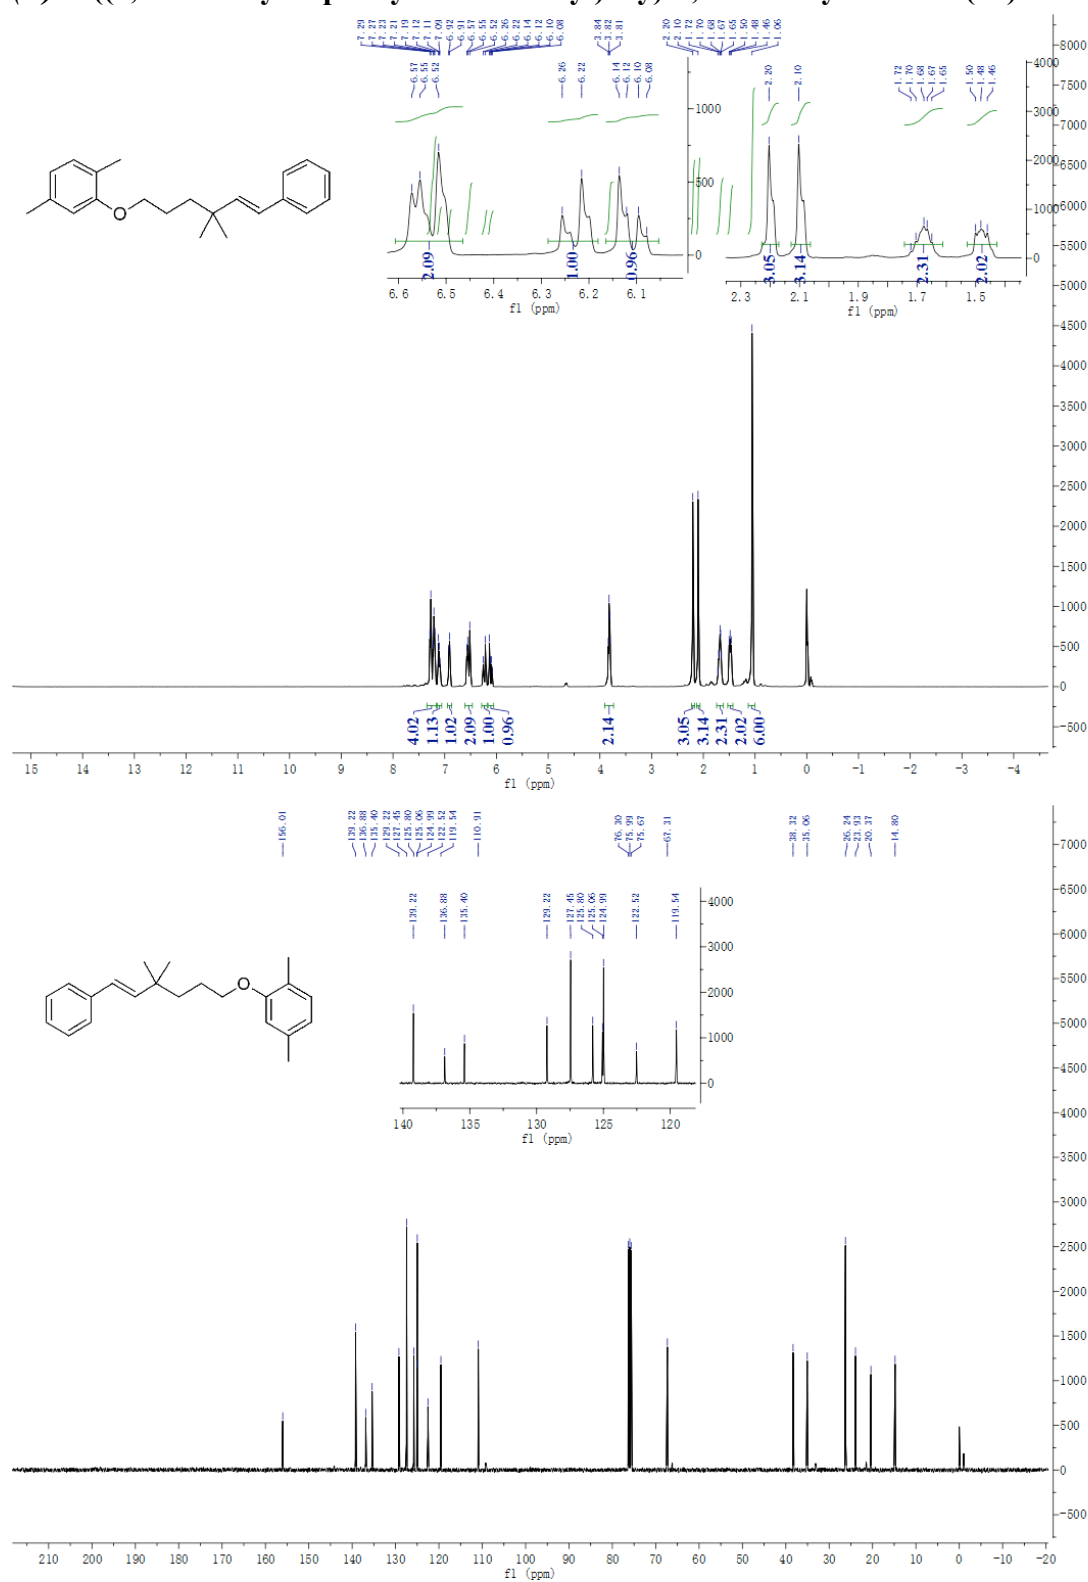

**<sup>1</sup>H NMR Spectrum (Top):**

- Chemical Shift (ppm):** 7.5 to 7.0 (aromatic), 7.4 to 6.5 (alkene), 2.4 to 1.0 (aliphatic).
- Integration:** 1.96, 2.39, 1.00, 2.91, 5.94, 6.19.

**<sup>13</sup>C NMR Spectrum (Bottom):**

- Chemical Shift (ppm):** 177.40 (C=O), 138.78, 138.13, 137.46, 136.78, 134.94, 134.79, 76.23, 75.70, 50.66, 38.07, 32.85, 29.70, 27.25.

**(E)-(3-ethylhept-1-en-1-yl)benzene (23)**

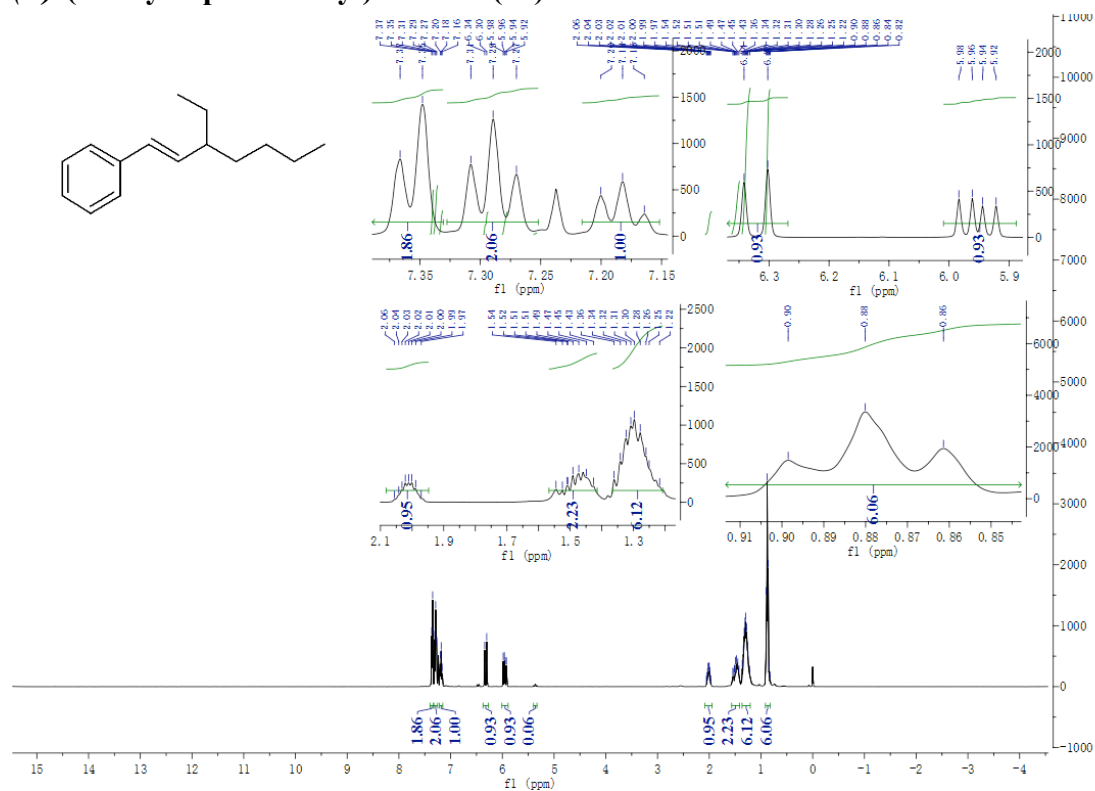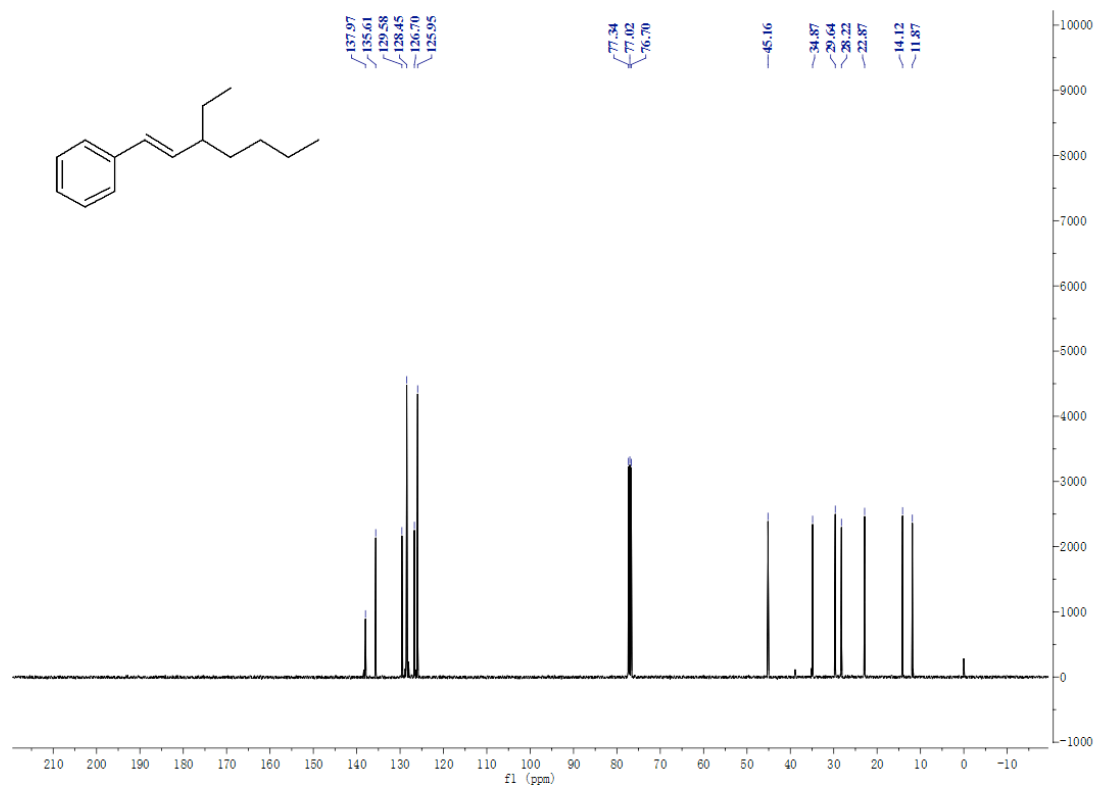

**<sup>1</sup>H NMR (400 MHz, CDCl<sub>3</sub>)**

| Chemical Shift (ppm) | Integration |
|----------------------|-------------|
| 6.20                 | 2.00        |
| 6.16                 | 2.00        |
| 6.13                 | 2.00        |
| 6.12                 | 2.00        |
| 6.09                 | 2.00        |
| 6.08                 | 2.00        |
| 3.72                 | 3.11        |
| 2.99                 | 0.98        |
| 2.12                 | 1.99        |
| 2.11                 | 4.08        |
| 2.10                 | 1.99        |
| 2.09                 | 4.08        |
| 2.08                 | 1.99        |
| 2.07                 | 4.08        |
| 2.06                 | 1.99        |
| 1.89                 | 1.99        |
| 1.87                 | 4.08        |
| 1.85                 | 1.99        |
| 1.84                 | 4.08        |
| 1.83                 | 1.99        |
| 1.80                 | 4.08        |
| 1.77                 | 1.99        |
| 1.74                 | 4.08        |
| 1.72                 | 1.99        |

**<sup>13</sup>C NMR (100 MHz, CDCl<sub>3</sub>)**

| Chemical Shift (ppm) |
|----------------------|
| 158.62               |
| 133.19               |
| 130.56               |
| 127.02               |
| 126.92               |
| 113.88               |
| 77.32                |
| 77.00                |
| 76.68                |
| 55.25                |
| 38.78                |
| 28.87                |
| 18.54                |

**(*E*)-tert-butyl (1-styrylcyclobutyl)carbamate (25)**

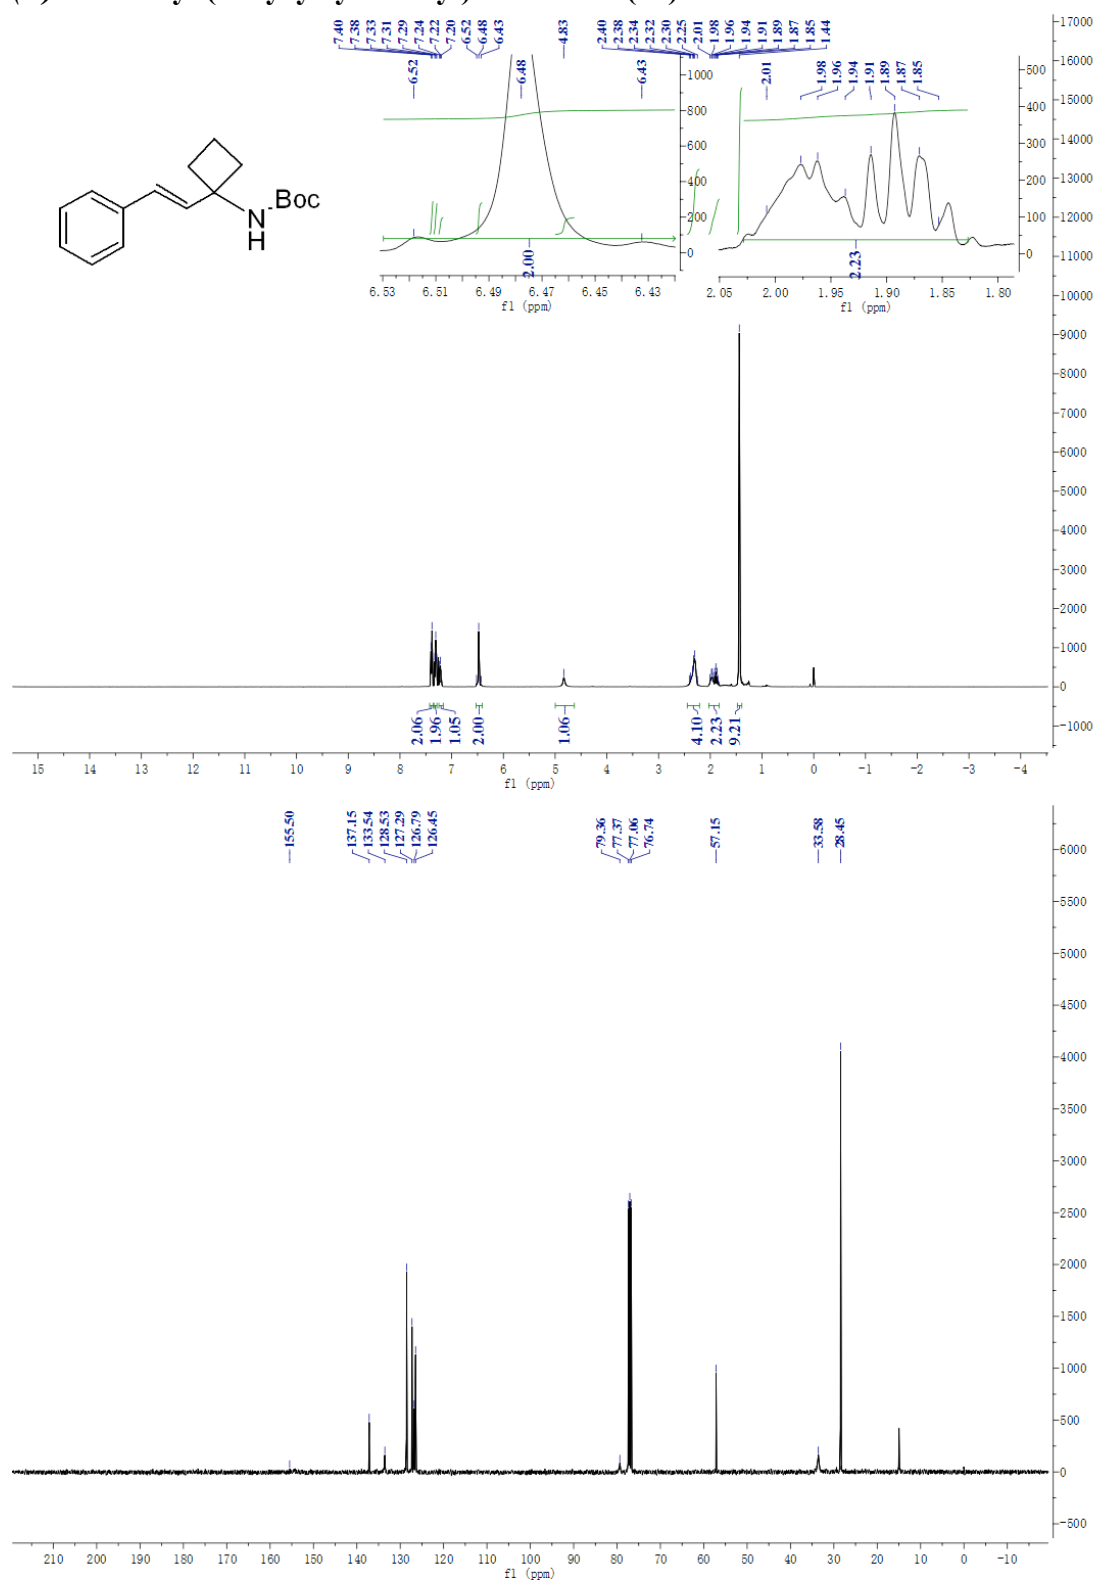

**(E)-2-(4-methoxystyryl)tetrahydrofuran (26)**

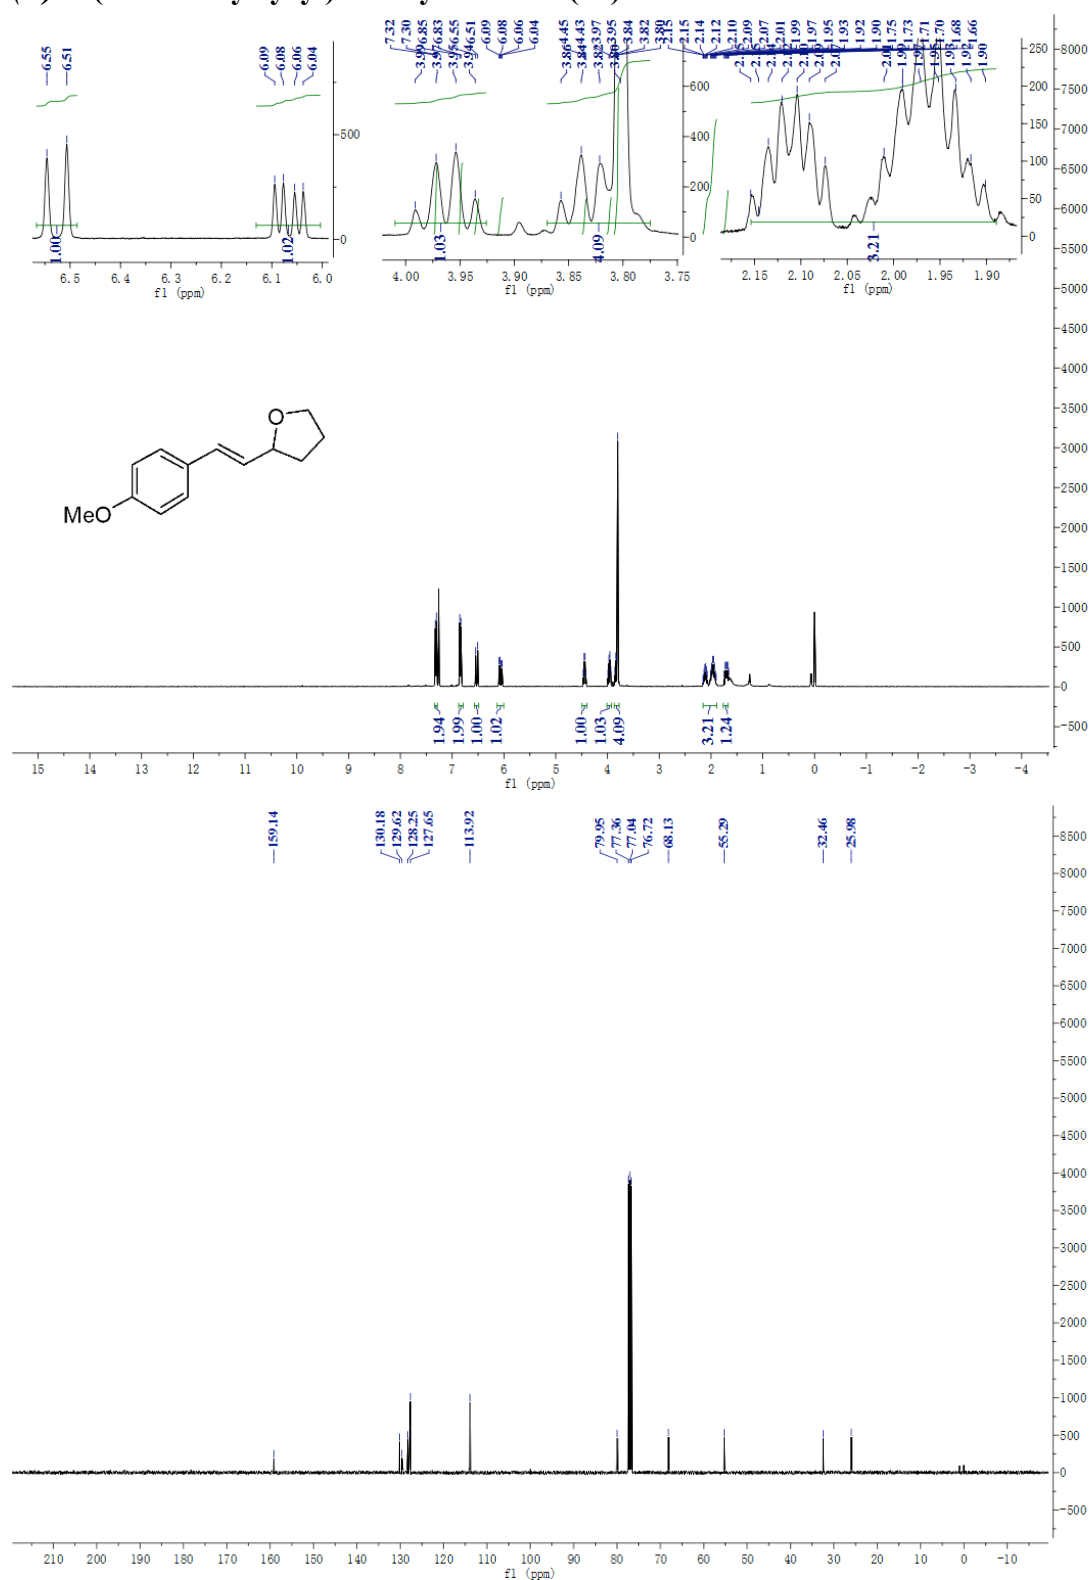

**(E)-tert-butyl 2-styrylpyrrolidine-1-carboxylate (27)**

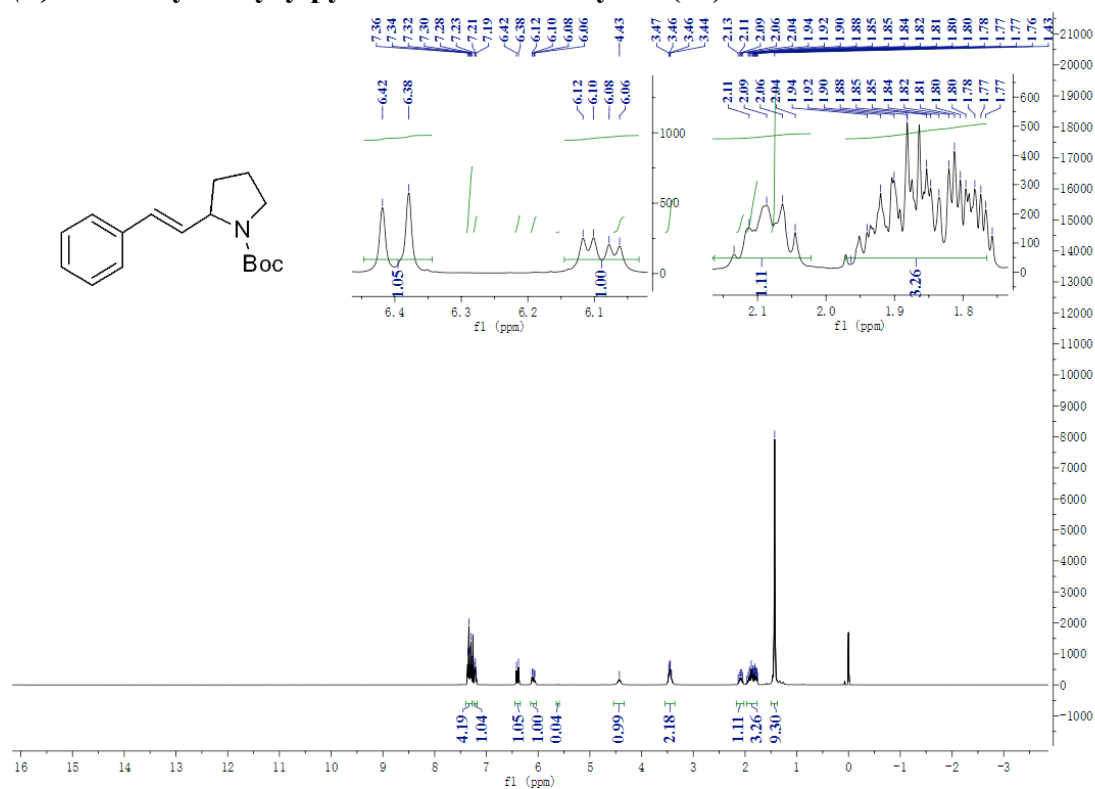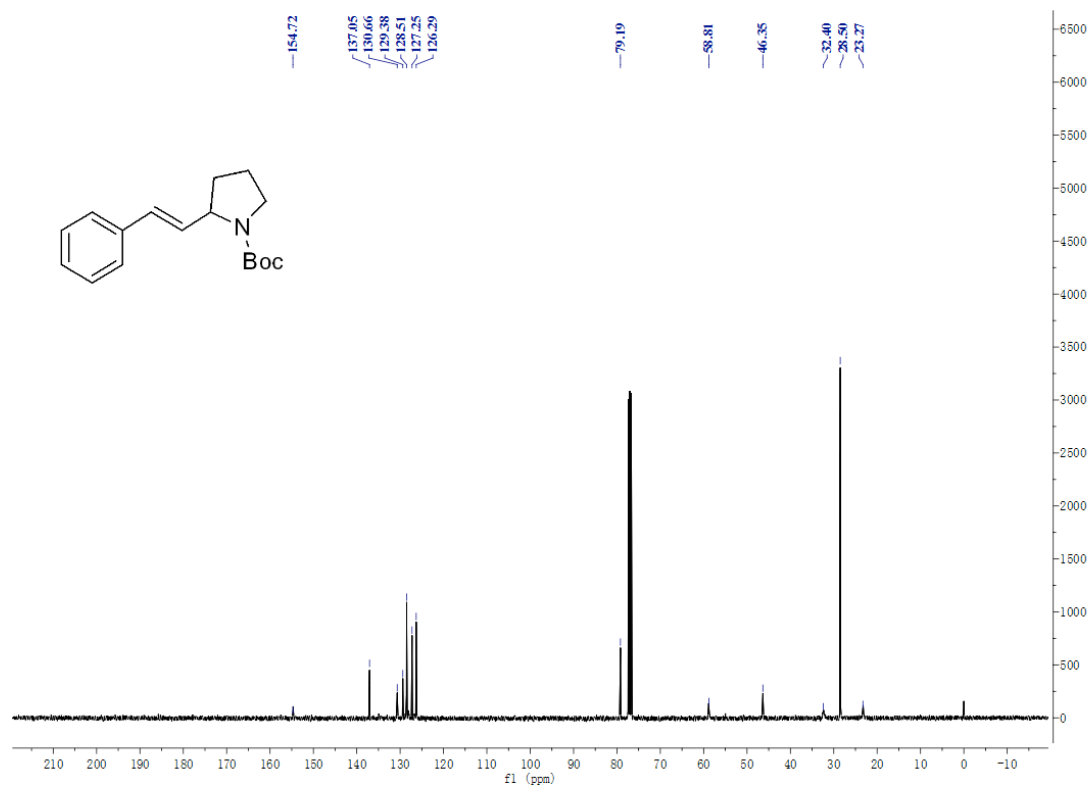



**(*E*)-tert-butyl (1,5-diphenylpent-1-en-3-yl)carbamate (28)**

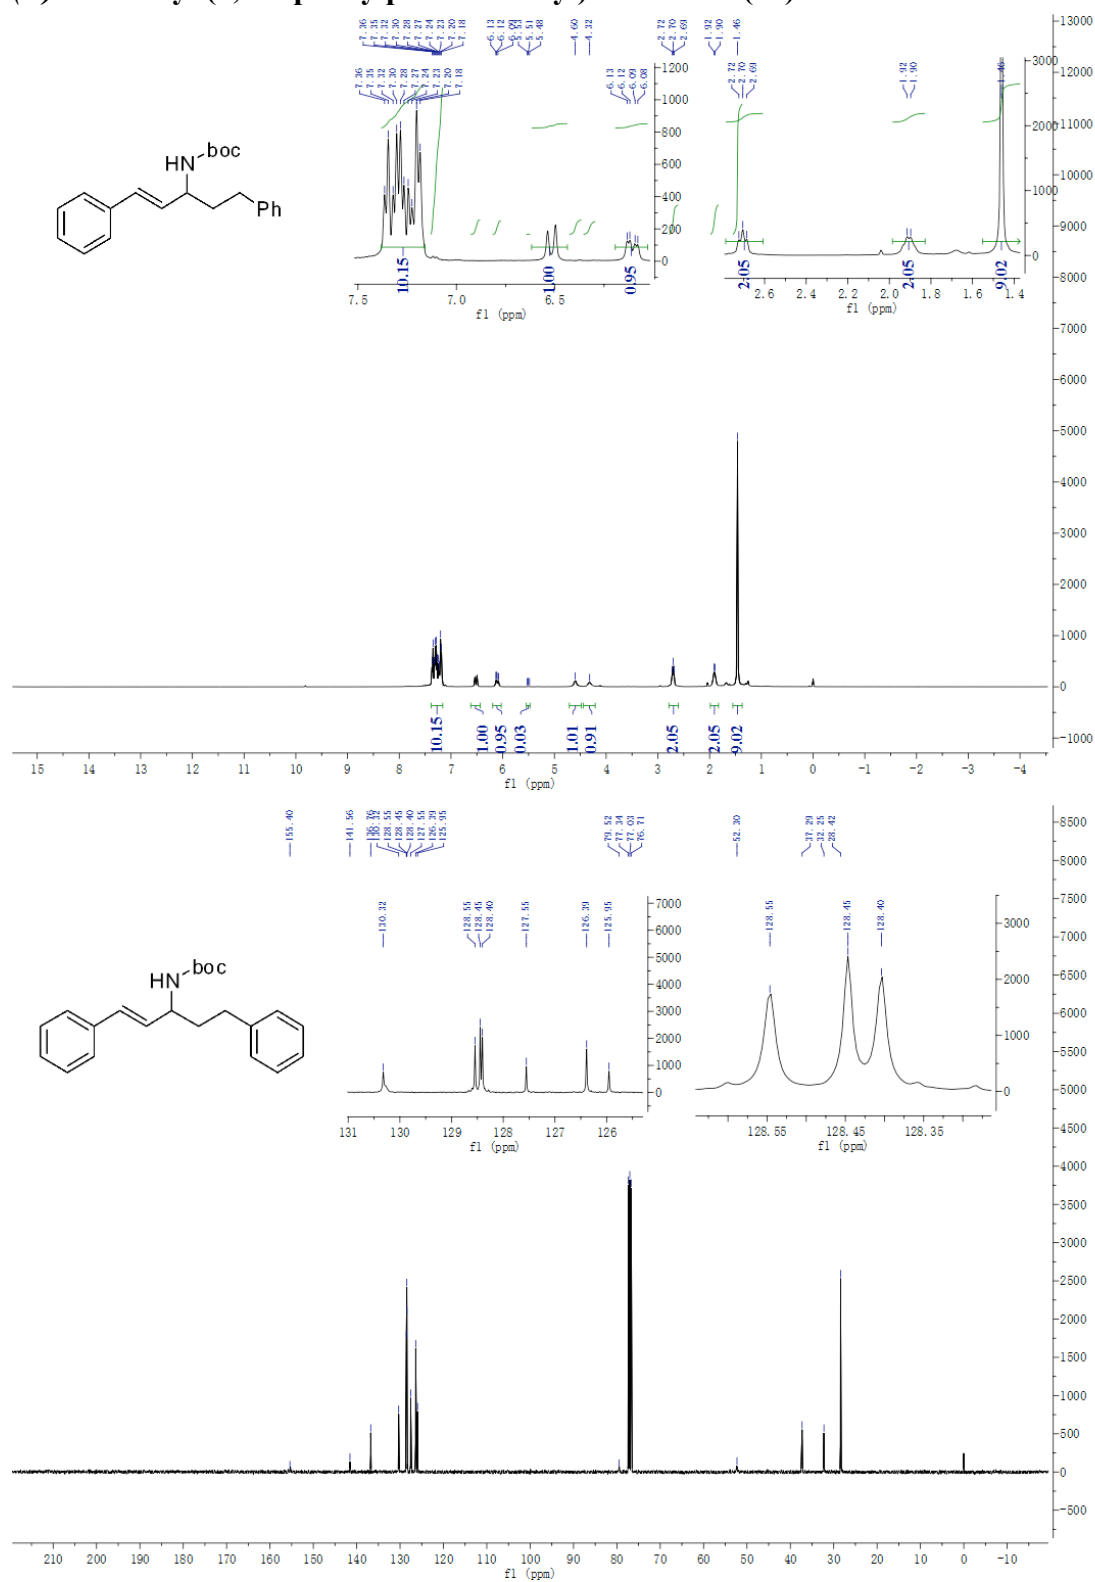

**(E)-1,6-diphenylhex-5-en-1-one (29)**

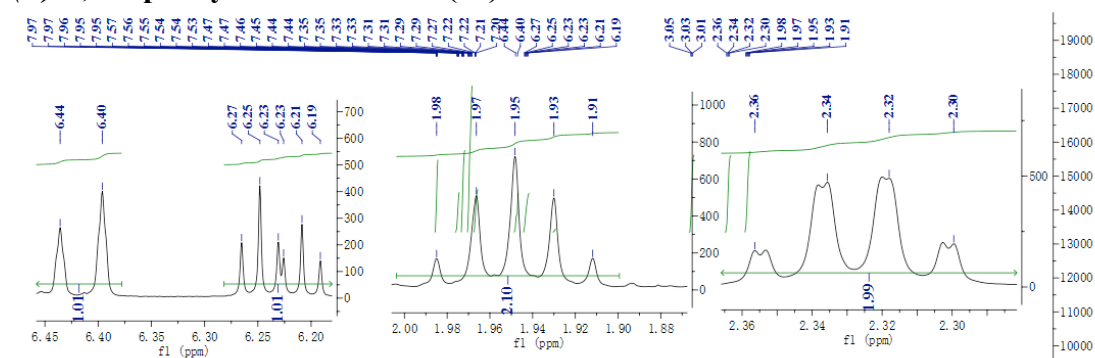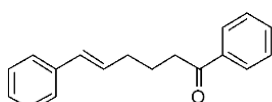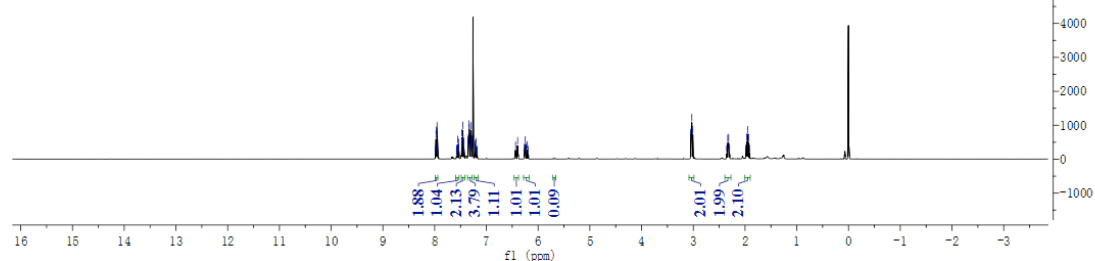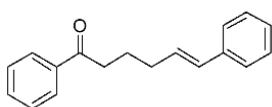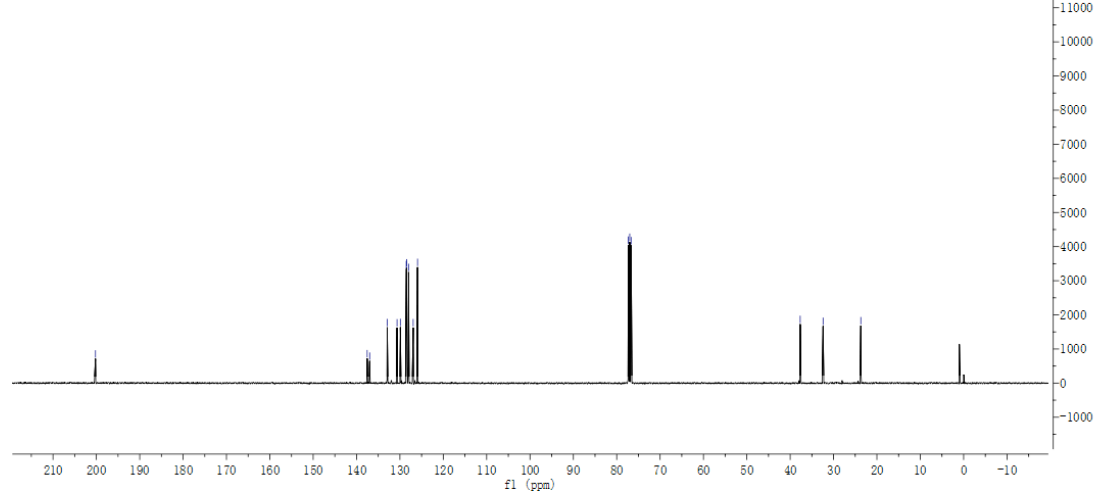

**(E)-1-(tert-butyl)-4-(hexa-1,5-dien-1-yl)benzene (30)**

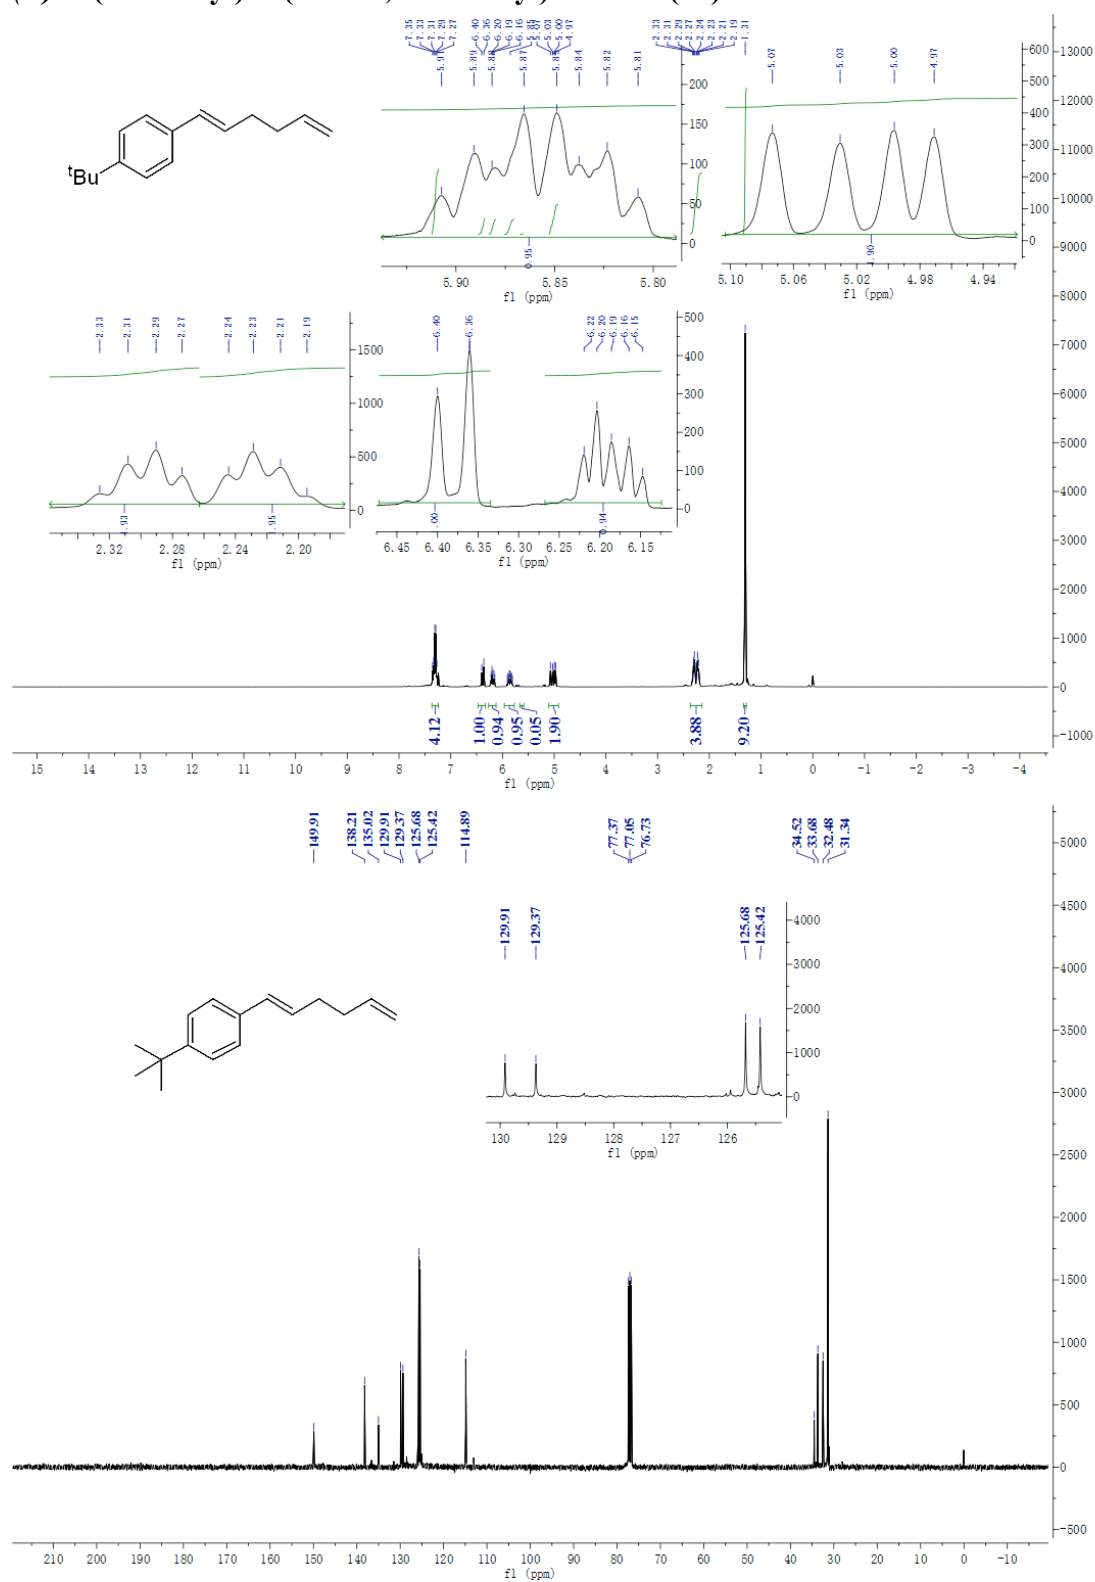

**(E)-pent-1-ene-1,5-diylidibenzene (31)**

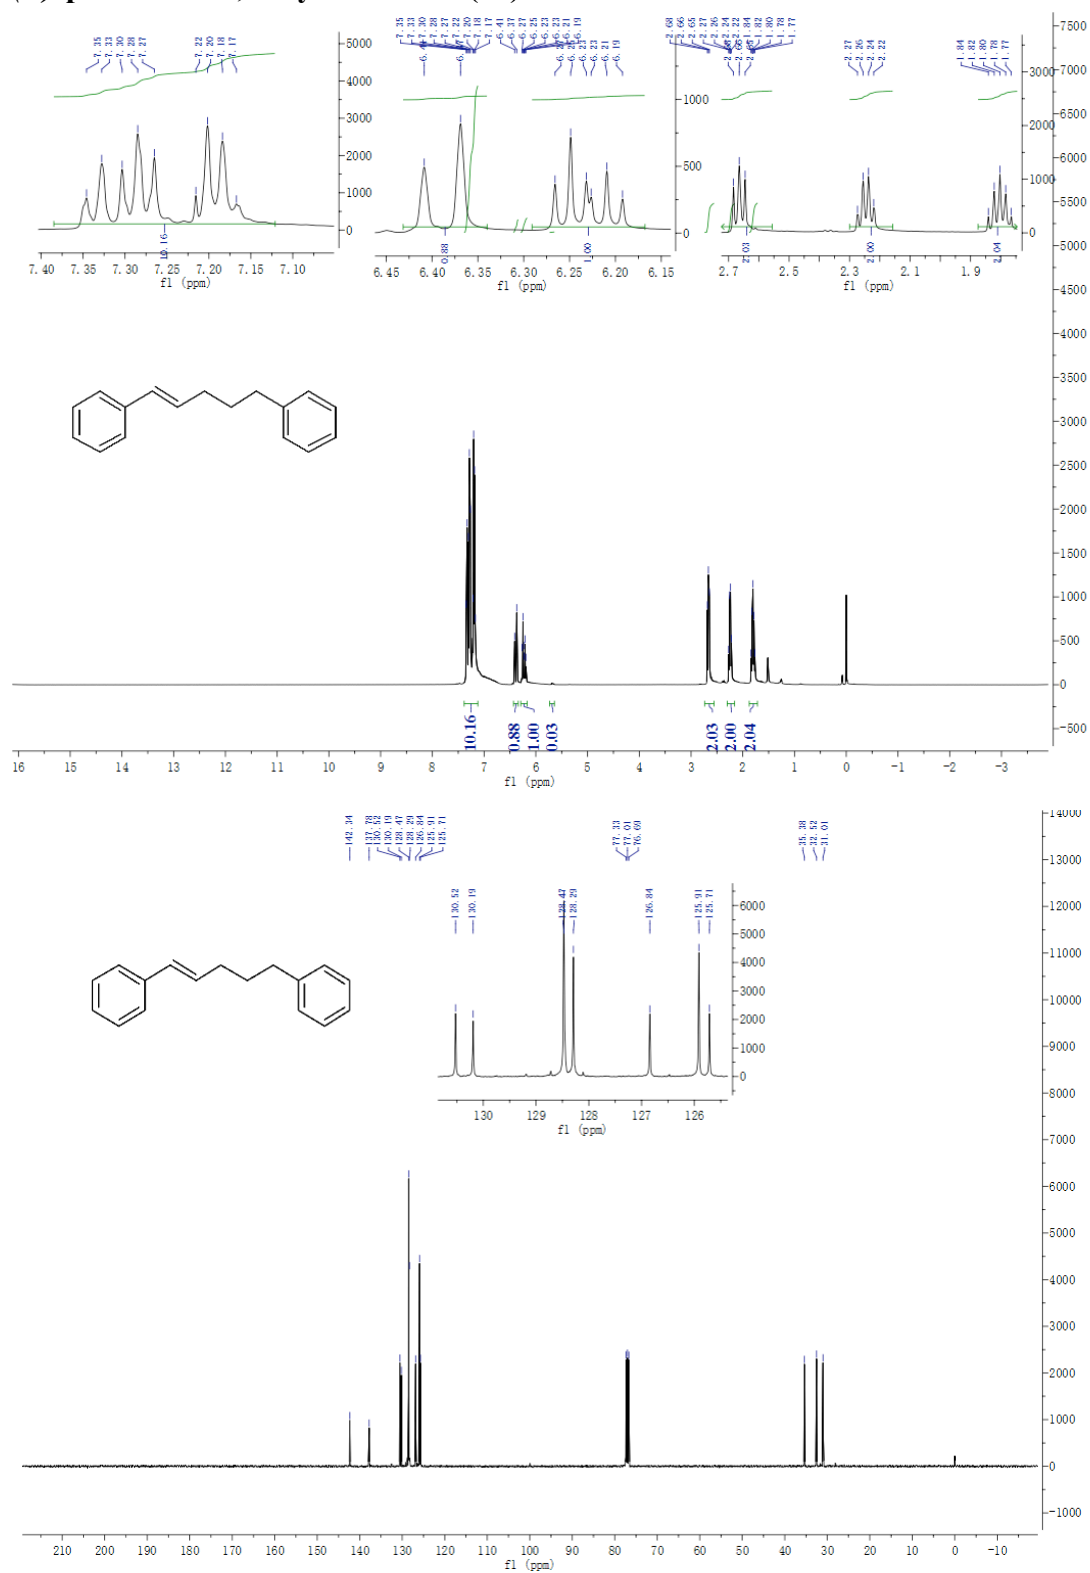

**(E)-hept-1-en-6-yn-1-ylbenzene (32)**

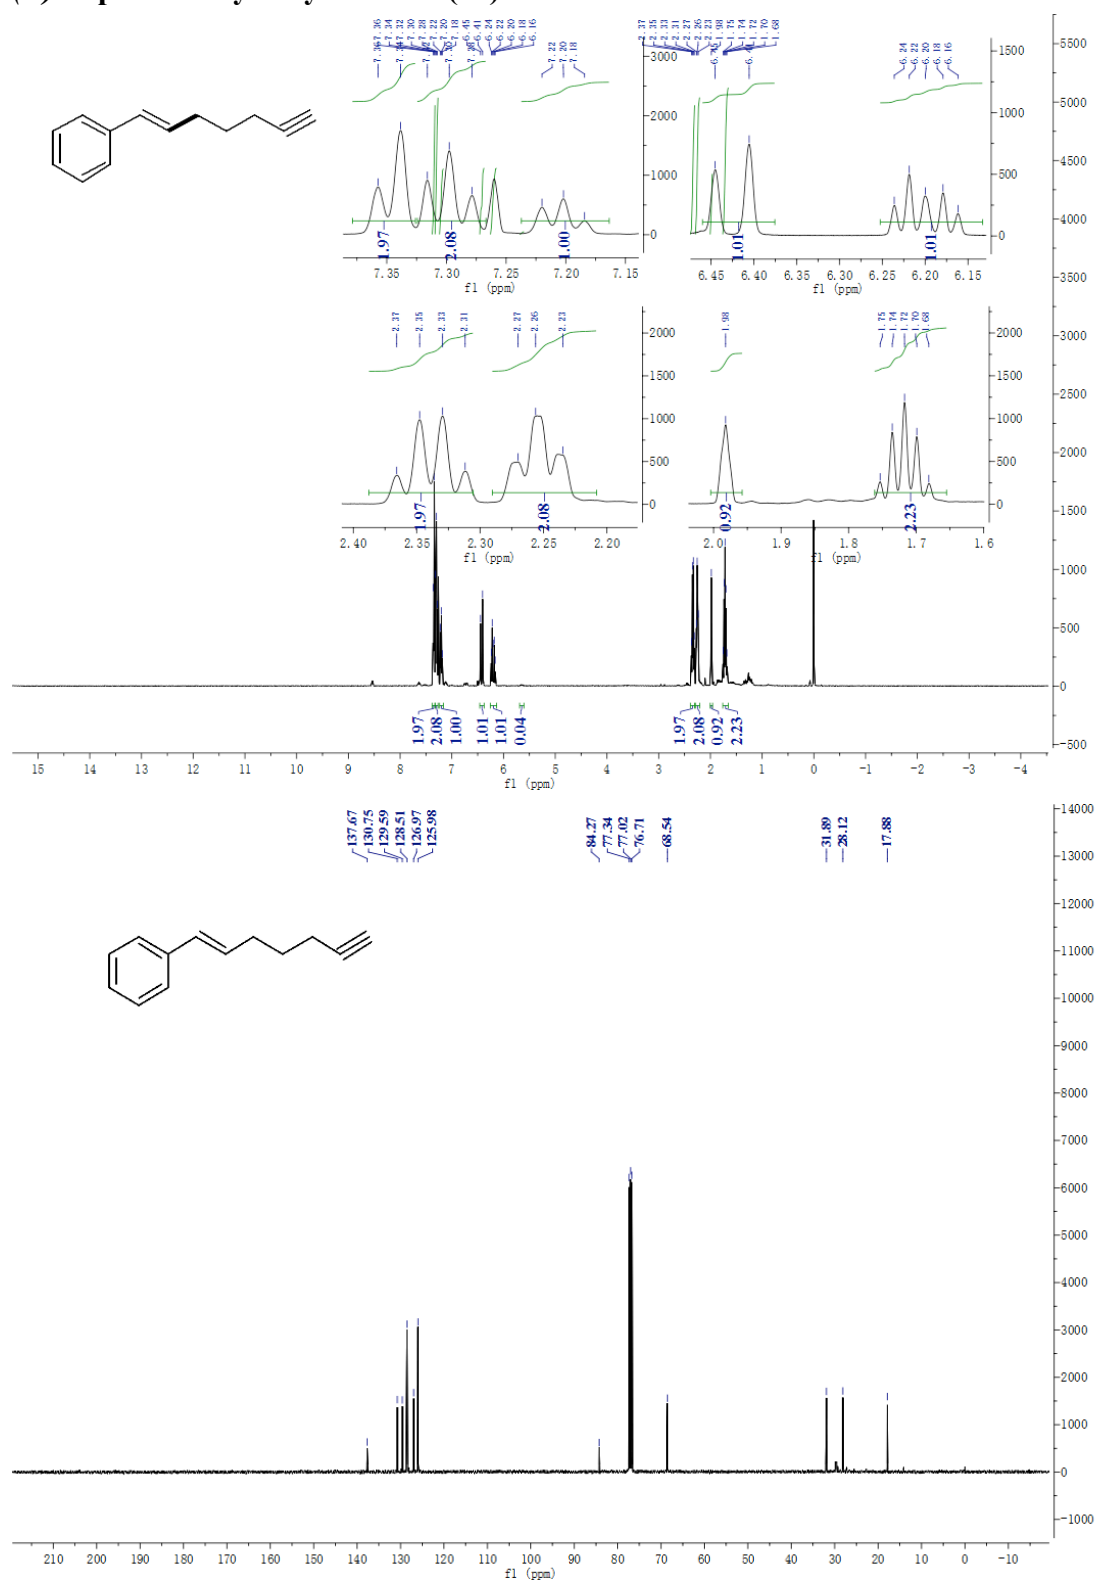

**(E)-(6-chlorohex-1-en-1-yl)benzene (33)**

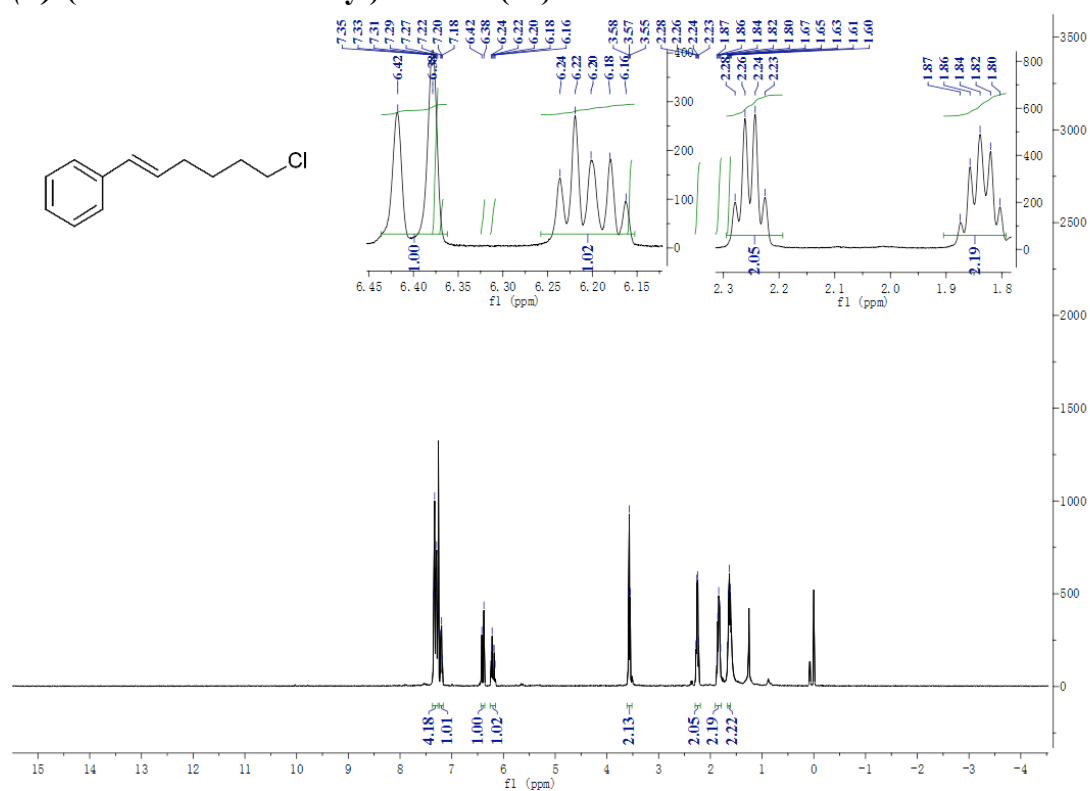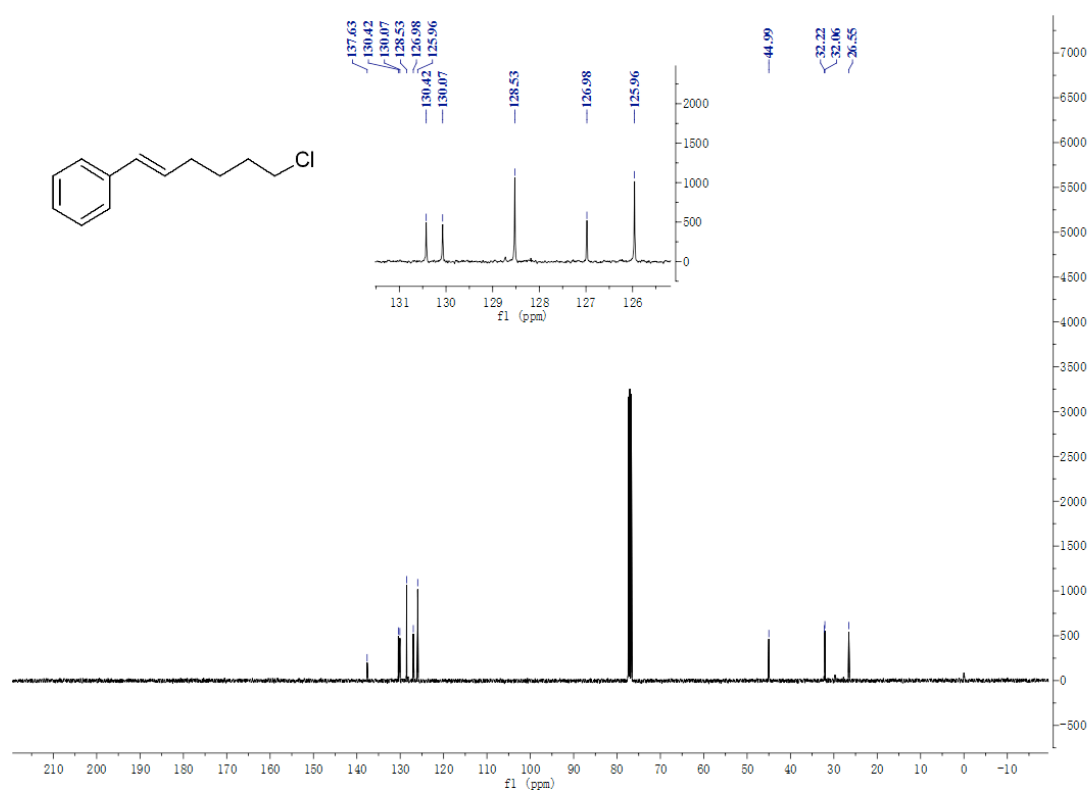

Supplement: Supplementary file 1 [file 10246515]
